# Supplementary material for: Atmospheric breakdown chemistry of the new “green” solvent 2,2,5,5-tetramethyloxolane via gas-phase reactions with OH and Cl radicals
Source: Copernicus journal article supplement (doi:10.5194/acp-22-14589-2022), 2022-11-17
Supplement: Supplementary file 1 [file acp-22-14589-2022-supplement.zip]

Archive with 3 entries (3 files):
- Supplement_ PLP-LIF and RR.xlsx
- acp-22-14589-2022-supplement-title-page.pdf
- acp-2022-446-supplement-QCC-version2.docx
