# Supplementary material for: Atmospheric breakdown chemistry of the new “green” solvent 2,2,5,5-tetramethyloxolane via gas-phase reactions with OH and Cl radicals
Source: Copernicus journal article supplement (doi:10.5194/acp-22-14589-2022), 2022-11-17
Supplement: Supplementary file 1 [file acp-22-14589-2022-supplement.zip › acp-22-14589-2022-supplement-title-page.pdf]

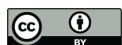

*Supplement of*

**Atmospheric breakdown chemistry of the new “green” solvent 2,2,5,5-tetramethyloxolane via gas-phase reactions with OH and Cl radicals**

**Caterina Mapelli et al.**

*Correspondence to:* Terry J. Dillon ([terry.dillon@york.ac.uk](mailto:terry.dillon@york.ac.uk))

- [acp-22-14589-2022-supplement-title-page.pdf](#)
- [Supplement\\_PLP-LIF and RR.xlsx](#)
- [acp-2022-446-supplement-QCC-version2.docx](#)

The copyright of individual parts of the supplement might differ from the article licence.
