# Supplementary material for: Atmospheric breakdown chemistry of the new “green” solvent 2,2,5,5-tetramethyloxolane via gas-phase reactions with OH and Cl radicals
Source: Copernicus journal article supplement (doi:10.5194/acp-22-14589-2022), 2022-11-17
Supplement: Supplementary file 1 [file acp-22-14589-2022-supplement.zip › acp-2022-446-supplement-QCC-version2.docx]

# Supplementary Information

**Table S1.** Optimised Cartesian coordinates in Ångström (Å) and energy, *E*SCF, in atomic units (a.u.) of OH as calculated at the B3LYP/CBSB7 level.

| *E*SCF = −75.754527 | | | |
| --- | --- | --- | --- |
| O | 0.000000 | 0.000000 | 0.108324 |
| H | 0.000000 | 0.000000 | −0.866592 |

**Table S2.** Optimised Cartesian coordinates in Ångström (Å) and energy, *E*SCF, in atomic units (a.u.) of H2O as calculated at the B3LYP/CBSB7 level.

| *E*SCF = *−*76.447449 | | | |
| --- | --- | --- | --- |
| O | 0.000000 | 0.000000 | 0.118711 |
| H | 0.000000 | 0.757022 | −0.474845 |
| H | 0.000000 | −0.757022 | −0.474845 |

**Table S3.** Optimised Cartesian coordinates in Ångström (Å) and energy, *E*SCF, in atomic units (a.u.) of TMO as calculated at the B3LYP/CBSB7 level.

| *E*SCF = *−*389.829529 | | | |
| --- | --- | --- | --- |
| O | 0.000000 | 0.000000 | 0.880658 |
| C | 0.444091 | 1.117813 | 0.075364 |
| C | 0.000000 | 0.765959 | −1.361051 |
| C | 0.000000 | −0.765959 | −1.361051 |
| C | −0.444091 | −1.117813 | 0.075364 |
| C | −0.224917 | 2.380194 | 0.618952 |
| C | 1.971090 | 1.220117 | 0.195063 |
| C | −1.971090 | −1.220117 | 0.195063 |
| C | 0.224917 | −2.380194 | 0.618952 |
| H | 0.063306 | 2.544707 | 1.660081 |
| H | 0.068835 | 3.259493 | 0.037804 |
| H | −1.311980 | 2.282336 | 0.578253 |
| H | 2.459733 | 0.339444 | −0.228960 |
| H | 2.349020 | 2.106142 | −0.324106 |
| H | 2.254977 | 1.287260 | 1.247777 |
| H | −2.254977 | −1.287260 | 1.247777 |
| H | −2.459733 | −0.339444 | −0.228960 |
| H | −2.349020 | −2.106142 | −0.324106 |
| H | −0.068835 | −3.259493 | 0.037804 |
| H | 1.311980 | −2.282336 | 0.578253 |
| H | −0.063306 | −2.544707 | 1.660081 |
| H | 0.662029 | 1.195715 | −2.115869 |
| H | −1.006676 | 1.150984 | −1.547582 |
| H | 1.006676 | −1.150984 | −1.547582 |
| H | −0.662029 | −1.195715 | −2.115869 |

**Table S4.** Optimised Cartesian coordinates in Ångström (Å) and energy, *E*SCF, in atomic units (a.u.) of the primary TMO radical as calculated at the B3LYP/CBSB7 level.

| *E*SCF = *−*389.155803 | | | |
| --- | --- | --- | --- |
| O | −0.028314 | 0.052211 | −0.887708 |
| C | 1.172926 | 0.000485 | −0.072543 |
| C | 0.667329 | −0.112559 | 1.387075 |
| C | −0.760742 | 0.435521 | 1.315474 |
| C | −1.222323 | −0.037403 | −0.079379 |
| C | 2.001600 | −1.209056 | −0.507441 |
| C | 1.938327 | 1.305610 | −0.317342 |
| C | −1.708558 | −1.456138 | −0.056377 |
| C | −2.268778 | 0.887615 | −0.719632 |
| H | 2.281086 | −1.119812 | −1.560154 |
| H | 2.917375 | −1.289724 | 0.086588 |
| H | 1.424940 | −2.128250 | −0.382502 |
| H | 1.364557 | 2.165654 | 0.036889 |
| H | 2.904313 | 1.297748 | 0.196440 |
| H | 2.115158 | 1.436754 | −1.387404 |
| H | −1.553592 | −2.078019 | −0.929124 |
| H | −2.363832 | −1.809858 | 0.731776 |
| H | −3.200027 | 0.875754 | −0.146974 |
| H | −1.885469 | 1.910844 | −0.756887 |
| H | −2.485325 | 0.561423 | −1.738884 |
| H | 1.304715 | 0.435440 | 2.084238 |
| H | 0.652046 | −1.160254 | 1.699783 |
| H | −0.763192 | 1.528892 | 1.350602 |
| H | −1.404926 | 0.071252 | 2.118262 |

**Table S5.** Optimised Cartesian coordinates in Ångström (Å) and energy, *E*SCF, in atomic units (a.u.) of the secondary TMO radical as calculated at the B3LYP/CBSB7 level.

| *E*SCF = *−*389.162967 | | | |
| --- | --- | --- | --- |
| O | 0.016323 | 0.101151 | −0.853895 |
| C | −1.194676 | 0.015296 | −0.065581 |
| C | −0.756851 | 0.405220 | 1.369830 |
| C | 0.693050 | 0.078949 | 1.369559 |
| C | 1.206649 | 0.005866 | −0.037015 |
| C | −2.194140 | 0.991622 | −0.681275 |
| C | −1.732589 | −1.421653 | −0.113550 |
| C | 2.102351 | 1.205954 | −0.399227 |
| C | 1.940360 | −1.311722 | −0.346606 |
| H | −2.411079 | 0.710893 | −1.714746 |
| H | −3.133345 | 0.993567 | −0.120427 |
| H | −1.783531 | 2.003604 | −0.681876 |
| H | −1.044459 | −2.113453 | 0.378015 |
| H | −2.702877 | −1.494242 | 0.387400 |
| H | −1.853142 | −1.738066 | −1.152105 |
| H | 2.338371 | 1.180744 | −1.466569 |
| H | 1.587390 | 2.144035 | −0.183346 |
| H | 3.038286 | 1.180456 | 0.165808 |
| H | 2.853963 | −1.395758 | 0.249273 |
| H | 1.305662 | −2.171501 | −0.127176 |
| H | 2.212407 | −1.344150 | −1.404847 |
| H | −1.326246 | −0.126881 | 2.139716 |
| H | −0.930813 | 1.480263 | 1.543761 |
| H | 1.333904 | 0.064088 | 2.241472 |

**Table S6.** Optimised Cartesian coordinates in Ångström (Å) and energy, *E*SCF, in atomic units (a.u.) of the TMO∙∙∙OH pre-reaction complex for as calculated at the B3LYP/CBSB7 level.

| *E*SCF = *−*465.599910 | | | |
| --- | --- | --- | --- |
| O | −0.100815 | 0.444138 | 0.252855 |
| C | 1.304549 | 0.154229 | 0.000247 |
| C | 1.286785 | −1.238327 | −0.664278 |
| C | 0.010622 | −1.885006 | −0.114051 |
| C | −0.969799 | −0.702594 | 0.006727 |
| C | 1.854680 | 1.252599 | −0.908311 |
| C | 2.032204 | 0.143071 | 1.349392 |
| C | −1.745085 | −0.449261 | −1.292445 |
| C | −1.923773 | −0.814745 | 1.194031 |
| H | 1.767703 | 2.229353 | −0.425935 |
| H | 2.910270 | 1.075026 | −1.133065 |
| H | 1.300726 | 1.286042 | −1.849010 |
| H | 1.660727 | −0.659172 | 1.991265 |
| H | 3.108039 | 0.002537 | 1.210083 |
| H | 1.872353 | 1.091271 | 1.867660 |
| H | −2.277634 | 0.501526 | −1.222880 |
| H | −1.073643 | −0.402664 | −2.153345 |
| H | −2.474626 | −1.244638 | −1.469864 |
| H | −2.597586 | −1.667097 | 1.069012 |
| H | −1.365024 | −0.944772 | 2.123444 |
| H | −2.528217 | 0.091367 | 1.278144 |
| H | 2.187978 | −1.811051 | −0.436379 |
| H | 1.228121 | −1.134671 | −1.751187 |
| H | 0.193776 | −2.321406 | 0.871889 |
| H | −0.379026 | −2.675753 | −0.758252 |
| O | −1.605913 | 2.781138 | 0.138916 |
| H | −0.981205 | 2.022102 | 0.226380 |

**Table S7.** Optimised Cartesian coordinates in Ångström (Å) and energy, *E*SCF, in atomic units (a.u.) of the TMO∙∙∙OH pre-reaction complex for as calculated at the B3LYP/CBSB7 level.

| *E*SCF = *−*465.588421 | | | |
| --- | --- | --- | --- |
| O | −0.588105 | 0.073998 | −0.897117 |
| C | 0.655136 | 0.079173 | −0.154084 |
| C | 0.252520 | −0.276025 | 1.293465 |
| C | −1.192593 | 0.223644 | 1.386399 |
| C | −1.745183 | −0.030503 | −0.032038 |
| C | 1.575599 | −0.962219 | −0.790507 |
| C | 1.273051 | 1.480119 | −0.252106 |
| C | −2.333398 | −1.441065 | −0.176435 |
| C | −2.755798 | 1.023712 | −0.483190 |
| H | 1.786745 | −0.703612 | −1.831473 |
| H | 2.527669 | −1.019723 | −0.238287 |
| H | 1.115202 | −1.952685 | −0.770630 |
| H | 0.651219 | 2.221722 | 0.255173 |
| H | 2.269209 | 1.493045 | 0.197539 |
| H | 1.352825 | 1.773491 | −1.302135 |
| H | −2.544147 | −1.647098 | −1.228354 |
| H | −1.633044 | −2.199809 | 0.181130 |
| H | −3.264352 | −1.539401 | 0.390182 |
| H | −3.651078 | 1.000058 | 0.145380 |
| H | −2.315231 | 2.021454 | −0.426046 |
| H | −3.057594 | 0.842990 | −1.517797 |
| H | 0.916805 | 0.182267 | 2.028536 |
| H | 0.296228 | −1.358806 | 1.441237 |
| H | −1.216402 | 1.294019 | 1.610663 |
| H | −1.775235 | −0.287646 | 2.155788 |
| O | 4.305323 | −0.186454 | 0.247146 |
| H | 4.427437 | 0.198367 | −0.640170 |

**Table S8.** Optimised Cartesian coordinates in Ångström (Å) and energy, *E*SCF, in atomic units (a.u.) of the TMO∙∙∙OH pre-reaction complex for as calculated at the B3LYP/CBSB7 level.

| *E*SCF = *−*465.599910 | | | |
| --- | --- | --- | --- |
| O | −0.100809 | −0.444008 | −0.253111 |
| C | −0.969891 | 0.702544 | −0.006762 |
| C | 0.010388 | 1.885089 | 0.113840 |
| C | 1.286659 | 1.238604 | 0.664056 |
| C | 1.304480 | −0.154070 | −0.000278 |
| C | −1.924161 | 0.814539 | −1.193863 |
| C | −1.744924 | 0.449115 | 1.292569 |
| C | 2.032361 | −0.143114 | −1.349302 |
| C | 1.854524 | −1.252264 | 0.908555 |
| H | −2.528186 | −0.091846 | −1.278017 |
| H | −2.598319 | 1.666559 | −1.068518 |
| H | −1.365653 | 0.944995 | −2.123358 |
| H | −1.073319 | 0.402585 | 2.153345 |
| H | −2.474511 | 1.244411 | 1.470123 |
| H | −2.277364 | −0.501738 | 1.223088 |
| H | 1.872564 | −1.091381 | −1.867465 |
| H | 1.660987 | 0.659048 | −1.991333 |
| H | 3.108174 | −0.002590 | −1.209836 |
| H | 2.910056 | −1.074560 | 1.133477 |
| H | 1.300404 | −1.285599 | 1.849159 |
| H | 1.767729 | −2.229106 | 0.426326 |
| H | −0.379310 | 2.675862 | 0.757973 |
| H | 0.193437 | 2.321386 | −0.872166 |
| H | 1.228116 | 1.135109 | 1.750983 |
| H | 2.187784 | 1.811360 | 0.435980 |
| O | −1.605250 | −2.781586 | −0.138917 |
| H | −0.980739 | −2.022395 | −0.226415 |

**Table S9.** Optimised Cartesian coordinates in Ångström (Å) and energy, *E*SCF, in atomic units (a.u.) of the TMO∙∙∙OH pre-reaction complex for as calculated at the B3LYP/CBSB7 level.

| *E*SCF = *−*465.588538 | | | |
| --- | --- | --- | --- |
| O | −0.736393 | 0.621839 | 0.728616 |
| C | 0.610165 | 0.616905 | 0.198010 |
| C | 0.503612 | −0.134550 | −1.144704 |
| C | −0.678567 | −1.082890 | −0.919174 |
| C | −1.616433 | −0.269065 | −0.000889 |
| C | 1.065766 | 2.066716 | 0.047012 |
| C | 1.505256 | −0.129145 | 1.197809 |
| C | −2.602183 | 0.590646 | −0.804248 |
| C | −2.359806 | −1.131651 | 1.018868 |
| H | 1.049564 | 2.573673 | 1.014993 |
| H | 2.083595 | 2.112208 | −0.350428 |
| H | 0.399987 | 2.605378 | −0.630848 |
| H | 1.190534 | −1.169803 | 1.308576 |
| H | 2.554530 | −0.108651 | 0.855445 |
| H | 1.461056 | 0.345282 | 2.181306 |
| H | −3.118777 | 1.282837 | −0.135475 |
| H | −2.082044 | 1.180706 | −1.562632 |
| H | −3.349506 | −0.032214 | −1.305252 |
| H | −3.036788 | −1.831078 | 0.519129 |
| H | −1.651691 | −1.703532 | 1.622793 |
| H | −2.949686 | −0.503118 | 1.690465 |
| H | 1.435610 | −0.642469 | −1.397665 |
| H | 0.281611 | 0.571408 | −1.950077 |
| H | −0.352872 | −1.994425 | −0.408984 |
| H | −1.170268 | −1.384671 | −1.846495 |
| O | 3.863827 | −0.948346 | −0.366694 |
| H | 3.668806 | −1.851283 | −0.056316 |

**Table S10.** Optimised Cartesian coordinates in Ångström (Å) and energy, *E*SCF, in atomic units (a.u.) of the TMO∙∙∙OH pre-reaction complex for as calculated at the B3LYP/CBSB7 level.

| *E*SCF = *−*465.588863 | | | |
| --- | --- | --- | --- |
| O | 0.448024 | −0.690825 | −0.799519 |
| C | −0.793539 | −0.946583 | −0.104828 |
| C | −0.823725 | 0.087459 | 1.037979 |
| C | 0.653781 | 0.368293 | 1.308982 |
| C | 1.307531 | 0.228441 | −0.084081 |
| C | −1.938276 | −0.779902 | −1.103874 |
| C | −0.752989 | −2.383338 | 0.442141 |
| C | 1.326434 | 1.561431 | −0.845137 |
| C | 2.706107 | −0.385897 | −0.029780 |
| H | −1.812235 | −1.475104 | −1.937278 |
| H | −2.902195 | −0.982267 | −0.627766 |
| H | −1.953835 | 0.237812 | −1.496551 |
| H | 0.041491 | −2.502162 | 1.182918 |
| H | −1.704575 | −2.654432 | 0.908623 |
| H | −0.556286 | −3.078499 | −0.377219 |
| H | 1.617583 | 1.388265 | −1.883565 |
| H | 0.338146 | 2.025542 | −0.845246 |
| H | 2.042832 | 2.257860 | −0.397166 |
| H | 3.398746 | 0.265297 | 0.512032 |
| H | 2.677361 | −1.357246 | 0.469026 |
| H | 3.093840 | −0.533669 | −1.040559 |
| H | −1.377477 | −0.257309 | 1.913960 |
| H | −1.348426 | 1.003080 | 0.678142 |
| H | 1.060481 | −0.382616 | 1.993767 |
| H | 0.837121 | 1.347437 | 1.758023 |
| O | −1.975825 | 2.577864 | 0.148320 |
| H | −1.342106 | 3.102292 | 0.670036 |

**Table S11.** Optimised Cartesian coordinates in Ångström (Å) and energy, *E*SCF, in atomic units (a.u.) of the TMO∙∙∙OH transition state as calculated at the B3LYP/CBSB7 level.

| *E*SCF = *−*465.589052 | | | |
| --- | --- | --- | --- |
| O | 0.072973 | 0.019196 | −0.803370 |
| C | −0.911751 | −0.707614 | −0.034149 |
| C | −0.471468 | −0.496204 | 1.425992 |
| C | 1.056961 | −0.466051 | 1.318133 |
| C | 1.318263 | 0.187135 | −0.062070 |
| C | −2.275210 | −0.122557 | −0.350477 |
| C | −0.890264 | −2.193665 | −0.442246 |
| C | 1.582476 | 1.691567 | 0.057963 |
| C | 2.439701 | −0.497967 | −0.844723 |
| H | −2.547065 | −0.206123 | −1.403557 |
| H | −3.070847 | −0.495526 | 0.297545 |
| H | −2.227097 | 1.072911 | −0.134998 |
| H | 0.061906 | −2.659873 | −0.178628 |
| H | −1.690303 | −2.748873 | 0.055698 |
| H | −1.023775 | −2.282517 | −1.522371 |
| H | 1.620577 | 2.145126 | −0.936460 |
| H | 0.792849 | 2.182281 | 0.630553 |
| H | 2.539609 | 1.879501 | 0.552709 |
| H | 3.395479 | −0.396912 | −0.321528 |
| H | 2.228192 | −1.561565 | −0.974090 |
| H | 2.541360 | −0.048132 | −1.835310 |
| H | −0.840720 | −1.278885 | 2.092286 |
| H | −0.853271 | 0.464413 | 1.778911 |
| H | 1.468736 | −1.478545 | 1.344757 |
| H | 1.525567 | 0.097471 | 2.127086 |
| O | −1.816929 | 2.326782 | −0.106840 |
| H | −1.061802 | 2.179553 | −0.701465 |

**Table S12.** Optimised Cartesian coordinates in Ångström (Å) and energy, *E*SCF, in atomic units (a.u.) of the TMO∙∙∙OH transition state as calculated at the B3LYP/CBSB7 level.

| *E*SCF = *−*465.586683 | | | |
| --- | --- | --- | --- |
| O | −0.575802 | 0.233281 | −0.887253 |
| C | 0.685687 | 0.253772 | −0.172121 |
| C | 0.347638 | −0.214688 | 1.261234 |
| C | −1.139958 | 0.124988 | 1.401144 |
| C | −1.688888 | −0.103353 | −0.021028 |
| C | 1.616324 | −0.702564 | −0.905261 |
| C | 1.237852 | 1.681121 | −0.204669 |
| C | −2.084690 | −1.566635 | −0.262261 |
| C | −2.838956 | 0.834062 | −0.385848 |
| H | 1.843458 | −0.373322 | −1.920770 |
| H | 2.647109 | −0.722275 | −0.304143 |
| H | 1.261960 | −1.734806 | −0.904781 |
| H | 0.603684 | 2.359071 | 0.371491 |
| H | 2.247528 | 1.699810 | 0.212327 |
| H | 1.270350 | 2.043517 | −1.235224 |
| H | −2.291213 | −1.723578 | −1.323375 |
| H | −1.283443 | −2.249485 | 0.030068 |
| H | −2.980834 | −1.828635 | 0.308076 |
| H | −3.708992 | 0.645425 | 0.249877 |
| H | −2.533823 | 1.875208 | −0.261900 |
| H | −3.135611 | 0.686375 | −1.427050 |
| H | 0.976338 | 0.274198 | 2.006634 |
| H | 0.509226 | −1.291631 | 1.356507 |
| H | −1.270827 | 1.173423 | 1.684601 |
| H | −1.650651 | −0.486691 | 2.147997 |
| O | 3.871711 | −0.493917 | 0.289845 |
| H | 4.318413 | −0.101730 | −0.478220 |

**Table S13.** Optimised Cartesian coordinates in Ångström (Å) and energy, *E*SCF, in atomic units (a.u.) of the TMO∙∙∙OH transition state as calculated at the B3LYP/CBSB7 level.

| *E*SCF = *−*465.589697 | | | |
| --- | --- | --- | --- |
| O | −0.027693 | −0.558560 | 0.155620 |
| C | −0.811527 | 0.650456 | −0.037074 |
| C | 0.200918 | 1.678875 | −0.593083 |
| C | 1.531606 | 1.215912 | 0.010962 |
| C | 1.400034 | −0.321587 | 0.034143 |
| C | −1.920296 | 0.311935 | −1.015558 |
| C | −1.391203 | 1.073639 | 1.318527 |
| C | 1.882458 | −0.961063 | −1.273977 |
| C | 2.084812 | −0.965431 | 1.238752 |
| H | −2.490477 | −0.673227 | −0.567707 |
| H | −2.698084 | 1.073717 | −1.093065 |
| H | −1.554890 | −0.003124 | −1.993363 |
| H | −0.595645 | 1.296440 | 2.032829 |
| H | −2.019839 | 1.962801 | 1.212787 |
| H | −2.001595 | 0.261427 | 1.715804 |
| H | 1.610915 | −2.018998 | −1.292964 |
| H | 1.424191 | −0.480745 | −2.141847 |
| H | 2.969209 | −0.881179 | −1.371301 |
| H | 3.165090 | −0.795913 | 1.207209 |
| H | 1.693271 | −0.547611 | 2.168617 |
| H | 1.908762 | −2.043909 | 1.247772 |
| H | −0.064253 | 2.701534 | −0.318915 |
| H | 0.234267 | 1.625971 | −1.684681 |
| H | 1.644157 | 1.598572 | 1.029087 |
| H | 2.398934 | 1.546298 | −0.564425 |
| O | −2.689563 | −1.787386 | 0.098987 |
| H | −1.746780 | −1.950913 | 0.281165 |

**Table S14.** Optimised Cartesian coordinates in Ångström (Å) and energy, *E*SCF, in atomic units (a.u.) of the TMO∙∙∙OH transition state as calculated at the B3LYP/CBSB7 level.

| *E*SCF = *−*465.586435 | | | |
| --- | --- | --- | --- |
| O | −0.737150 | 0.893686 | 0.450351 |
| C | 0.669113 | 0.805966 | 0.108352 |
| C | 0.766201 | −0.455999 | −0.766940 |
| C | −0.406701 | −1.320912 | −0.331443 |
| C | −1.486255 | −0.271252 | 0.024725 |
| C | 1.062586 | 2.077798 | −0.643265 |
| C | 1.467690 | 0.676017 | 1.411870 |
| C | −2.332158 | 0.111820 | −1.197008 |
| C | −2.377361 | −0.697834 | 1.189685 |
| H | 0.896835 | 2.954474 | −0.012825 |
| H | 2.118543 | 2.048524 | −0.926603 |
| H | 0.460578 | 2.190340 | −1.547588 |
| H | 1.179103 | −0.228485 | 1.954591 |
| H | 2.539933 | 0.633665 | 1.208618 |
| H | 1.258702 | 1.531003 | 2.058436 |
| H | −2.959354 | 0.972531 | −0.954311 |
| H | −1.700297 | 0.384517 | −2.045764 |
| H | −2.979940 | −0.715083 | −1.503335 |
| H | −2.964406 | −1.583575 | 0.929571 |
| H | −1.771349 | −0.925012 | 2.069422 |
| H | −3.067966 | 0.107629 | 1.451035 |
| H | 1.805499 | −0.992236 | −0.630251 |
| H | 0.760630 | −0.228002 | −1.836271 |
| H | −0.150827 | −1.905354 | 0.557709 |
| H | −0.737287 | −2.018731 | −1.102509 |
| O | 3.028733 | −1.626532 | −0.327447 |
| H | 2.800240 | −1.917070 | 0.570994 |

**Table S15.** Optimised Cartesian coordinates in Ångström (Å) and energy, *E*SCF, in atomic units (a.u.) of the TMO∙∙∙OH transition state as calculated at the B3LYP/CBSB7 level.

| *E*SCF = *−*465.588766 | | | |
| --- | --- | --- | --- |
| O | 0.385773 | −0.742048 | −0.783288 |
| C | −0.888116 | −0.834265 | −0.109890 |
| C | −0.812965 | 0.210626 | 1.016679 |
| C | 0.678200 | 0.349618 | 1.297415 |
| C | 1.328559 | 0.105852 | −0.083052 |
| C | −1.991205 | −0.557660 | −1.132004 |
| C | −1.026015 | −2.254269 | 0.468480 |
| C | 1.489817 | 1.409619 | −0.876550 |
| C | 2.654931 | −0.647971 | 0.005193 |
| H | −1.931894 | −1.282655 | −1.947060 |
| H | −2.979046 | −0.636557 | −0.669020 |
| H | −1.883078 | 0.445616 | −1.545232 |
| H | −0.260680 | −2.449849 | 1.223372 |
| H | −2.009474 | −2.401087 | 0.923905 |
| H | −0.901265 | −2.983506 | −0.335259 |
| H | 1.767530 | 1.180277 | −1.907690 |
| H | 0.555573 | 1.973873 | −0.891435 |
| H | 2.272804 | 2.038122 | −0.439697 |
| H | 3.405645 | −0.056945 | 0.538398 |
| H | 2.521404 | −1.597644 | 0.528193 |
| H | 3.035094 | −0.861563 | −0.996593 |
| H | −1.424676 | −0.031265 | 1.888193 |
| H | −1.244628 | 1.196960 | 0.614882 |
| H | 0.996246 | −0.420987 | 2.008151 |
| H | 0.955927 | 1.315800 | 1.725395 |
| O | −1.684292 | 2.591350 | 0.160592 |
| H | −1.086566 | 3.087704 | 0.745446 |

**Table S16.** Optimised Cartesian coordinates in Ångström (Å) and energy, *E*SCF, in atomic units (a.u.) of the TMO∙∙∙OH post-reaction complex for as calculated at the B3LYP/CBSB7 level.

| *E*SCF = *−*465.611810 | | | |
| --- | --- | --- | --- |
| O | 0.580251 | −0.346134 | −0.877586 |
| C | −0.347882 | −1.159385 | −0.126391 |
| C | −0.430615 | −0.502741 | 1.280821 |
| C | 0.900449 | 0.248951 | 1.386406 |
| C | 1.175813 | 0.695219 | −0.063822 |
| C | −1.657046 | −1.185506 | −0.848068 |
| C | 0.237765 | −2.587401 | −0.048575 |
| C | 0.491507 | 2.028112 | −0.397640 |
| C | 2.663137 | 0.746554 | −0.407150 |
| H | −1.670930 | −0.979374 | −1.911696 |
| H | −2.510220 | −1.685337 | −0.400885 |
| H | −2.786645 | 0.796665 | −0.343134 |
| H | 1.171670 | −2.580085 | 0.520348 |
| H | −0.460800 | −3.275269 | 0.435650 |
| H | 0.452475 | −2.954030 | −1.054185 |
| H | 0.593206 | 2.235526 | −1.465941 |
| H | −0.571955 | 1.992233 | −0.153942 |
| H | 0.944857 | 2.853594 | 0.159415 |
| H | 3.172679 | 1.511345 | 0.186265 |
| H | 3.133100 | −0.219586 | −0.210683 |
| H | 2.801366 | 0.984542 | −1.464683 |
| H | −0.564648 | −1.249115 | 2.066394 |
| H | −1.270940 | 0.191608 | 1.330598 |
| H | 1.697863 | −0.418293 | 1.726704 |
| H | 0.854919 | 1.092708 | 2.077995 |
| O | −3.103038 | 1.558513 | 0.163656 |
| H | −3.002470 | 2.301009 | −0.440258 |

**Table S17.** Optimised Cartesian coordinates in Ångström (Å) and energy, *E*SCF, in atomic units (a.u.) of the TMO∙∙∙OH post-reaction complex for as calculated at the B3LYP/CBSB7 level.

| *E*SCF = *−*465.610414 | | | |
| --- | --- | --- | --- |
| O | −0.726128 | 0.456468 | −0.841757 |
| C | 0.636910 | 0.256851 | −0.344720 |
| C | 0.465566 | −0.570292 | 0.953233 |
| C | −0.961391 | −0.239494 | 1.400391 |
| C | −1.718710 | −0.079767 | 0.067809 |
| C | 1.386049 | −0.476048 | −1.410589 |
| C | 1.246165 | 1.635849 | −0.081834 |
| C | −2.225343 | −1.422544 | −0.476828 |
| C | −2.856786 | 0.937884 | 0.135813 |
| H | 1.910041 | 0.075033 | −2.184707 |
| H | 3.323968 | −0.753735 | −0.116593 |
| H | 1.139098 | −1.512683 | −1.613735 |
| H | 0.703171 | 2.156052 | 0.710322 |
| H | 2.289944 | 1.527138 | 0.222207 |
| H | 1.192629 | 2.245935 | −0.986741 |
| H | −2.593162 | −1.291645 | −1.496986 |
| H | −1.428329 | −2.169516 | −0.500080 |
| H | −3.040961 | −1.812992 | 0.139258 |
| H | −3.636611 | 0.601719 | 0.825509 |
| H | −2.481186 | 1.905058 | 0.476294 |
| H | −3.305773 | 1.073769 | −0.850998 |
| H | 1.229388 | −0.320267 | 1.690361 |
| H | 0.560432 | −1.637581 | 0.735595 |
| H | −0.982731 | 0.703067 | 1.954982 |
| H | −1.397930 | −1.010691 | 2.038919 |
| O | 3.990185 | −0.473343 | 0.526583 |
| H | 4.570786 | 0.101711 | 0.018129 |

**Table S18.** Optimised Cartesian coordinates in Ångström (Å) and energy, *E*SCF, in atomic units (a.u.) of the TMO∙∙∙OH post-reaction complex for as calculated at the B3LYP/CBSB7 level.

| *E*SCF = *−*465.616916 | | | |
| --- | --- | --- | --- |
| O | −0.132900 | −0.443821 | −0.185214 |
| C | −0.779099 | 0.864018 | −0.047732 |
| C | 0.414449 | 1.856766 | −0.047493 |
| C | 1.558364 | 1.035297 | 0.554579 |
| C | 1.307471 | −0.385738 | 0.010257 |
| C | −1.689379 | 1.046344 | −1.212746 |
| C | −1.557123 | 0.883456 | 1.274444 |
| C | 1.981929 | −0.612394 | −1.348019 |
| C | 1.690035 | −1.485629 | 0.999386 |
| H | −2.875535 | −1.743396 | −0.793462 |
| H | −2.705470 | 1.397350 | −1.086832 |
| H | −1.319984 | 0.848119 | −2.211544 |
| H | −0.881755 | 0.804932 | 2.129196 |
| H | −2.128182 | 1.811645 | 1.369881 |
| H | −2.243537 | 0.035507 | 1.296793 |
| H | 1.639671 | −1.555377 | −1.780262 |
| H | 1.737704 | 0.188806 | −2.049699 |
| H | 3.069808 | −0.655698 | −1.241147 |
| H | 2.764985 | −1.464690 | 1.201460 |
| H | 1.155500 | −1.354697 | 1.942502 |
| H | 1.437675 | −2.469835 | 0.597273 |
| H | 0.182390 | 2.760348 | 0.518706 |
| H | 0.650779 | 2.158006 | −1.071121 |
| H | 1.499089 | 1.035113 | 1.646293 |
| H | 2.544747 | 1.412641 | 0.276335 |
| O | −2.435398 | −2.138337 | −0.034581 |
| H | −1.541381 | −1.764233 | −0.082063 |

**Table S19.** Optimised Cartesian coordinates in Ångström (Å) and energy, *E*SCF, in atomic units (a.u.) of the TMO∙∙∙OH post-reaction complex for as calculated at the B3LYP/CBSB7 level.

| *E*SCF = *−*465.615758 | | | |
| --- | --- | --- | --- |
| O | −0.784772 | 0.563840 | 0.760915 |
| C | 0.503173 | 0.795765 | 0.146746 |
| C | 0.626776 | −0.300094 | −0.871596 |
| C | −0.539629 | −1.220361 | −0.789779 |
| C | −1.574968 | −0.401657 | 0.028155 |
| C | 0.539824 | 2.199949 | −0.486120 |
| C | 1.559899 | 0.700999 | 1.262927 |
| C | −2.559240 | 0.332179 | −0.893271 |
| C | −2.322261 | −1.237035 | 1.065115 |
| H | 0.333118 | 2.952518 | 0.278932 |
| H | 1.524504 | 2.402590 | −0.916680 |
| H | −0.208034 | 2.296664 | −1.274538 |
| H | 1.499985 | −0.274086 | 1.752060 |
| H | 2.563349 | 0.832583 | 0.853082 |
| H | 1.375180 | 1.471834 | 2.015700 |
| H | −3.151530 | 1.042534 | −0.312115 |
| H | −2.031275 | 0.884910 | −1.673738 |
| H | −3.240266 | −0.373149 | −1.379249 |
| H | −2.929679 | −2.007253 | 0.581118 |
| H | −1.615056 | −1.721312 | 1.742005 |
| H | −2.982348 | −0.601137 | 1.659736 |
| H | 2.876612 | −1.398998 | −0.350998 |
| H | 1.389141 | −0.312591 | −1.640022 |
| H | −0.289491 | −2.153315 | −0.259443 |
| H | −0.924276 | −1.520118 | −1.770329 |
| O | 3.828746 | −1.246885 | −0.344466 |
| H | 4.056830 | −1.275787 | 0.589823 |

**Table S20.** Optimised Cartesian coordinates in Ångström (Å) and energy, *E*SCF, in atomic units (a.u.) of the TMO∙∙∙OH post-reaction complex for as calculated at the B3LYP/CBSB7 level.

| *E*SCF = *−*465.617941 | | | |
| --- | --- | --- | --- |
| O | 0.756815 | −0.613617 | −0.721566 |
| C | −0.402986 | −1.186222 | −0.075479 |
| C | −0.591000 | −0.347722 | 1.157358 |
| C | 0.597137 | 0.528918 | 1.349353 |
| C | 1.206573 | 0.599959 | −0.074340 |
| C | −1.601128 | −1.144824 | −1.039585 |
| C | −0.055723 | −2.646359 | 0.277661 |
| C | 0.677124 | 1.814943 | −0.848802 |
| C | 2.733078 | 0.569366 | −0.079732 |
| H | −1.353359 | −1.694280 | −1.951109 |
| H | −2.480022 | −1.610217 | −0.583610 |
| H | −1.858051 | −0.120112 | −1.308696 |
| H | 0.793343 | −2.684848 | 0.963215 |
| H | −0.907128 | −3.151356 | 0.741987 |
| H | 0.215102 | −3.185536 | −0.633753 |
| H | 0.948309 | 1.728095 | −1.903006 |
| H | −0.410457 | 1.881190 | −0.779637 |
| H | 1.104876 | 2.743421 | −0.456539 |
| H | 3.142689 | 1.453253 | 0.417845 |
| H | 3.097484 | −0.323360 | 0.433200 |
| H | 3.106595 | 0.549167 | −1.106211 |
| H | −1.286486 | −0.617508 | 1.944427 |
| H | −2.289753 | 1.229363 | 0.594171 |
| H | 1.313128 | 0.071846 | 2.052041 |
| H | 0.359791 | 1.518214 | 1.755578 |
| O | −2.811958 | 1.907027 | 0.143122 |
| H | −2.433359 | 2.737035 | 0.449045 |

**Table S21.** Optimised Cartesian coordinates in Ångström (Å) and energy, *E*SCF, in atomic units (a.u.) of OH as calculated at the B3LYP/GTBas3 level.

| *E*SCF = *−*75.733693 | | | |
| --- | --- | --- | --- |
| O | 0.000000 | 0.000000 | 0.108459 |
| H | 0.000000 | 0.000000 | −0.867675 |

**Table S22.** Optimised Cartesian coordinates in Ångström (Å) and energy, *E*SCF, in atomic units (a.u.) of H2O as calculated at the B3LYP/ GTBas3 level.

| *E*SCF = *−*76.426078 | | | |
| --- | --- | --- | --- |
| O | 0.000000 | 0.000000 | 0.118711 |
| H | 0.000000 | 0.757022 | −0.474845 |
| H | 0.000000 | −0.757022 | −0.474845 |

**Table S23.** Optimised Cartesian coordinates in Ångström (Å) and energy, *E*SCF, in atomic units (a.u.) of TMO as calculated at the B3LYP/GTBas3 level.

| *E*SCF = −389.754586 | | | |
| --- | --- | --- | --- |
| O | 0.000000 | 0.000000 | 0.876736 |
| C | 0.440015 | 1.114354 | 0.076652 |
| C | 0.000000 | 0.766208 | −1.361784 |
| C | 0.000000 | −0.766208 | −1.361784 |
| C | −0.440015 | −1.114354 | 0.076652 |
| C | −0.232999 | 2.376275 | 0.619035 |
| C | 1.967551 | 1.224744 | 0.197168 |
| C | −1.967551 | −1.224744 | 0.197168 |
| C | 0.232999 | −2.376275 | 0.619035 |
| H | 0.058930 | 2.550473 | 1.659158 |
| H | 0.053900 | 3.255287 | 0.031935 |
| H | −1.321393 | 2.274612 | 0.583244 |
| H | 2.463080 | 0.351025 | −0.237080 |
| H | 2.340206 | 2.118551 | −0.314831 |
| H | 2.254456 | 1.285077 | 1.250961 |
| H | −2.254456 | −1.285077 | 1.250961 |
| H | −2.463080 | −0.351025 | −0.237080 |
| H | −2.340206 | −2.118551 | −0.314831 |
| H | −0.053900 | −3.255287 | 0.031935 |
| H | 1.321393 | −2.274612 | 0.583244 |
| H | −0.058930 | −2.550473 | 1.659158 |
| H | 0.664142 | 1.197295 | −2.115488 |
| H | −1.006936 | 1.152732 | −1.551269 |
| H | 1.006936 | −1.152732 | −1.551269 |
| H | −0.664142 | −1.197295 | −2.115488 |

**Table S24.** Optimised Cartesian coordinates in Ångström (Å) and energy, *E*SCF, in atomic units (a.u.) of the primary TMO radical as calculated at the B3LYP/GTBas3 level.

| *E*SCF = *−*389.080913 | | | |
| --- | --- | --- | --- |
| O | −0.029031 | 0.058613 | −0.884063 |
| C | 1.166946 | 0.002006 | −0.074523 |
| C | 0.667435 | −0.086932 | 1.389724 |
| C | −0.763828 | 0.453403 | 1.311168 |
| C | −1.216916 | −0.037121 | −0.080670 |
| C | 1.982561 | −1.223992 | −0.491958 |
| C | 1.950574 | 1.293814 | −0.336812 |
| C | −1.691789 | −1.460140 | −0.043043 |
| C | −2.272965 | 0.873368 | −0.727681 |
| H | 2.272227 | −1.153015 | −1.544813 |
| H | 2.894379 | −1.309947 | 0.109260 |
| H | 1.393582 | −2.135880 | −0.358718 |
| H | 1.390605 | 2.167395 | 0.010720 |
| H | 2.918361 | 1.277782 | 0.175472 |
| H | 2.128898 | 1.412641 | −1.409485 |
| H | −1.521939 | −2.094896 | −0.904696 |
| H | −2.360993 | −1.806106 | 0.737596 |
| H | −3.201286 | 0.862006 | −0.148266 |
| H | −1.898897 | 1.900808 | −0.780018 |
| H | −2.497154 | 0.533854 | −1.742444 |
| H | 1.304988 | 0.476935 | 2.075395 |
| H | 0.658501 | −1.129507 | 1.722841 |
| H | −0.773157 | 1.548274 | 1.334815 |
| H | −1.407975 | 0.094313 | 2.117617 |

**Table S25.** Optimised Cartesian coordinates in Ångström (Å) and energy, *E*SCF, in atomic units (a.u.) of the secondary TMO radical as calculated at the B3LYP/GTBas3 level.

| *E*SCF = *−*389.088123 | | | |
| --- | --- | --- | --- |
| O | 0.017349 | 0.105310 | −0.849466 |
| C | −1.189116 | 0.015789 | −0.068007 |
| C | −0.760839 | 0.402285 | 1.371872 |
| C | 0.691731 | 0.087157 | 1.370314 |
| C | 1.201845 | 0.007306 | −0.037176 |
| C | −2.190456 | 0.992982 | −0.681682 |
| C | −1.729700 | −1.421400 | −0.119230 |
| C | 2.106972 | 1.199854 | −0.404841 |
| C | 1.932728 | −1.314936 | −0.340595 |
| H | −2.415717 | 0.712579 | −1.714996 |
| H | −3.127663 | 0.996630 | −0.115565 |
| H | −1.779827 | 2.006499 | −0.685050 |
| H | −1.050563 | −2.114228 | 0.386399 |
| H | −2.707856 | −1.489966 | 0.369181 |
| H | −1.838130 | −1.743602 | −1.158741 |
| H | 2.355441 | 1.164578 | −1.470476 |
| H | 1.595888 | 2.144457 | −0.201750 |
| H | 3.038706 | 1.175246 | 0.169129 |
| H | 2.847236 | −1.397357 | 0.256135 |
| H | 1.297797 | −2.174844 | −0.115369 |
| H | 2.207435 | −1.355469 | −1.399336 |
| H | −1.328188 | −0.141558 | 2.136821 |
| H | −0.948133 | 1.474472 | 1.555036 |
| H | 1.335790 | 0.085864 | 2.240385 |

**Table S26.** Optimised Cartesian coordinates in Ångström (Å) and energy, *E*SCF, in atomic units (a.u.) of the TMO∙∙∙OH pre-reaction complex for as calculated at the B3LYP/GTBas3 level.

| *E*SCF = *−*465.503647 | | | |
| --- | --- | --- | --- |
| O | −0.108359 | 0.460214 | 0.198579 |
| C | 1.307543 | 0.225596 | 0.000138 |
| C | 1.379219 | −1.206985 | −0.569682 |
| C | 0.117877 | −1.876769 | −0.012114 |
| C | −0.914522 | −0.732968 | 0.006527 |
| C | 1.831813 | 1.285298 | −0.968728 |
| C | 2.002058 | 0.341001 | 1.363145 |
| C | −1.666361 | −0.601396 | −1.325151 |
| C | −1.897431 | −0.812844 | 1.173821 |
| H | 1.704447 | 2.288892 | −0.551394 |
| H | 2.897748 | 1.132975 | −1.167219 |
| H | 1.292794 | 1.238373 | −1.919058 |
| H | 1.661187 | −0.440775 | 2.048231 |
| H | 3.088141 | 0.253170 | 1.255373 |
| H | 1.778803 | 1.310194 | 1.818289 |
| H | −2.246174 | 0.325606 | −1.328954 |
| H | −0.975540 | −0.579412 | −2.173399 |
| H | −2.353651 | −1.441930 | −1.466462 |
| H | −2.529695 | −1.702234 | 1.085949 |
| H | −1.361217 | −0.859925 | 2.125927 |
| H | −2.543131 | 0.070016 | 1.182254 |
| H | 2.300321 | −1.717901 | −0.278663 |
| H | 1.350322 | −1.178453 | −1.663562 |
| H | 0.291433 | −2.242345 | 1.005222 |
| H | −0.218310 | −2.724534 | −0.614094 |
| O | −1.886444 | 2.611537 | 0.109047 |
| H | −1.140218 | 1.968682 | 0.172810 |

**Table S27.** Optimised Cartesian coordinates in Ångström (Å) and energy, *E*SCF, in atomic units (a.u.) of the TMO∙∙∙OH pre-reaction complex for as calculated at the B3LYP/GTBas3 level.

| *E*SCF = *−*465.492393 | | | |
| --- | --- | --- | --- |
| O | −0.596669 | 0.091431 | −0.897281 |
| C | 0.653304 | 0.098173 | −0.179338 |
| C | 0.282916 | −0.280334 | 1.270977 |
| C | −1.166788 | 0.200455 | 1.393996 |
| C | −1.733741 | −0.038511 | −0.021572 |
| C | 1.572918 | −0.928114 | −0.843080 |
| C | 1.261879 | 1.504785 | −0.268866 |
| C | −2.313112 | −1.452938 | −0.176746 |
| C | −2.764090 | 1.011528 | −0.440054 |
| H | 1.786985 | −0.648426 | −1.879482 |
| H | 2.527359 | −0.995782 | −0.291846 |
| H | 1.115319 | −1.921831 | −0.842776 |
| H | 0.651128 | 2.234548 | 0.271455 |
| H | 2.271726 | 1.513943 | 0.152646 |
| H | 1.312556 | 1.820578 | −1.315476 |
| H | −2.531117 | −1.652406 | −1.229882 |
| H | −1.605556 | −2.211871 | 0.170611 |
| H | −3.240396 | −1.563628 | 0.395625 |
| H | −3.645023 | 0.973503 | 0.209530 |
| H | −2.331993 | 2.014472 | −0.382235 |
| H | −3.091606 | 0.839939 | −1.469931 |
| H | 0.955331 | 0.177019 | 2.000631 |
| H | 0.343150 | −1.365379 | 1.404943 |
| H | −1.200972 | 1.267899 | 1.636077 |
| H | −1.733027 | −0.329864 | 2.164090 |
| O | 4.242693 | −0.204310 | 0.297600 |
| H | 4.488240 | 0.060053 | −0.608428 |

**Table S28.** Optimised Cartesian coordinates in Ångström (Å) and energy, *E*SCF, in atomic units (a.u.) of the TMO∙∙∙OH pre-reaction complex for as calculated at the B3LYP/GTBas3 level.

| *E*SCF = *−*465.503647 | | | |
| --- | --- | --- | --- |
| O | −0.108523 | −0.460600 | −0.196606 |
| C | −0.914129 | 0.733298 | −0.006380 |
| C | 0.118891 | 1.876595 | 0.013846 |
| C | 1.379670 | 1.205747 | 0.571384 |
| C | 1.307585 | −0.226105 | 0.000012 |
| C | −1.895030 | 0.813935 | −1.175315 |
| C | −1.668165 | 0.602211 | 1.324058 |
| C | 2.000667 | −0.339849 | −1.363892 |
| C | 1.832982 | −1.286920 | 0.967011 |
| H | −2.542155 | −0.067887 | −1.184484 |
| H | −2.526086 | 1.704341 | −1.088943 |
| H | −1.357198 | 0.859792 | −2.126569 |
| H | −0.978620 | 0.580107 | 2.173347 |
| H | −2.355404 | 1.442985 | 1.464179 |
| H | −2.248252 | −0.324618 | 1.327063 |
| H | 1.776948 | −1.308518 | −1.819916 |
| H | 1.659177 | 0.442705 | −2.047777 |
| H | 3.086864 | −0.252146 | −1.257148 |
| H | 2.899100 | −1.134725 | 1.164572 |
| H | 1.294897 | −1.241184 | 1.917924 |
| H | 1.705315 | −2.290024 | 0.548595 |
| H | −0.217275 | 2.723857 | 0.616543 |
| H | 0.293084 | 2.243244 | −1.002987 |
| H | 1.350074 | 1.175901 | 1.665219 |
| H | 2.301158 | 1.716614 | 0.281500 |
| O | −1.888360 | −2.611232 | −0.108840 |
| H | −1.141384 | −1.969247 | −0.171902 |

**Table S29.** Optimised Cartesian coordinates in Ångström (Å) and energy, *E*SCF, in atomic units (a.u.) of the TMO∙∙∙OH pre-reaction complex for as calculated at the B3LYP/GTBas3 level.

| *E*SCF = *−*465.492576 | | | |
| --- | --- | --- | --- |
| O | −0.731171 | 0.612598 | 0.730940 |
| C | 0.608957 | 0.606984 | 0.203255 |
| C | 0.503835 | −0.130905 | −1.147244 |
| C | −0.684729 | −1.074258 | −0.931297 |
| C | −1.612963 | −0.262724 | −0.001156 |
| C | 1.071812 | 2.056718 | 0.063876 |
| C | 1.504996 | −0.150113 | 1.195883 |
| C | −2.600413 | 0.606729 | −0.794122 |
| C | −2.358572 | −1.134031 | 1.010987 |
| H | 1.070211 | 2.556946 | 1.037147 |
| H | 2.087085 | 2.100130 | −0.343381 |
| H | 0.403791 | 2.608019 | −0.603830 |
| H | 1.196376 | −1.195636 | 1.290639 |
| H | 2.555879 | −0.121601 | 0.855168 |
| H | 1.458960 | 0.309517 | 2.187951 |
| H | −3.109865 | 1.301456 | −0.120233 |
| H | −2.083065 | 1.195730 | −1.557343 |
| H | −3.356218 | −0.010485 | −1.291663 |
| H | −3.033235 | −1.831374 | 0.502995 |
| H | −1.651650 | −1.711769 | 1.613305 |
| H | −2.954554 | −0.513667 | 1.687196 |
| H | 1.433985 | −0.642895 | −1.403578 |
| H | 0.287102 | 0.584565 | −1.947422 |
| H | −0.364523 | −1.995411 | −0.432550 |
| H | −1.180927 | −1.362427 | −1.861685 |
| O | 3.841687 | −0.933579 | −0.385844 |
| H | 3.758981 | −1.813653 | 0.025413 |

**Table S30.** Optimised Cartesian coordinates in Ångström (Å) and energy, *E*SCF, in atomic units (a.u.) of the TMO∙∙∙OH pre-reaction complex for as calculated at the B3LYP/GTBas3 level.

| *E*SCF = *−*465.492893 | | | |
| --- | --- | --- | --- |
| O | 0.427641 | −0.695809 | −0.796440 |
| C | −0.812860 | −0.923900 | −0.105939 |
| C | −0.823981 | 0.106166 | 1.041082 |
| C | 0.659710 | 0.359204 | 1.308514 |
| C | 1.306015 | 0.198261 | −0.085984 |
| C | −1.955513 | −0.728499 | −1.103874 |
| C | −0.809426 | −2.363803 | 0.437855 |
| C | 1.364119 | 1.530557 | −0.848657 |
| C | 2.689633 | −0.451412 | −0.027747 |
| H | −1.856947 | −1.432581 | −1.935419 |
| H | −2.924593 | −0.898311 | −0.623147 |
| H | −1.941280 | 0.288321 | −1.502965 |
| H | −0.024784 | −2.502634 | 1.187780 |
| H | −1.771830 | −2.614455 | 0.895992 |
| H | −0.621645 | −3.064380 | −0.380824 |
| H | 1.651725 | 1.349619 | −1.888387 |
| H | 0.390031 | 2.027709 | −0.847713 |
| H | 2.102575 | 2.205313 | −0.400856 |
| H | 3.395373 | 0.181076 | 0.521335 |
| H | 2.636056 | −1.424746 | 0.468344 |
| H | 3.082980 | −0.604625 | −1.037126 |
| H | −1.382164 | −0.231843 | 1.918200 |
| H | −1.333398 | 1.035197 | 0.686470 |
| H | 1.053576 | −0.396266 | 1.997767 |
| H | 0.863908 | 1.337479 | 1.752717 |
| O | −1.894248 | 2.605666 | 0.143052 |
| H | −1.292902 | 3.106839 | 0.723436 |

**Table S31.** Optimised Cartesian coordinates in Ångström (Å) and energy, *E*SCF, in atomic units (a.u.) of the TMO∙∙∙OH transition state as calculated at the B3LYP/GTBas3 level.

| *E*SCF = *−*465.493085 | | | |
| --- | --- | --- | --- |
| O | 0.074449 | 0.014653 | −0.802421 |
| C | −0.910128 | −0.702520 | −0.036439 |
| C | −0.484672 | −0.473383 | 1.425697 |
| C | 1.045096 | −0.442760 | 1.328170 |
| C | 1.312249 | 0.183670 | −0.063759 |
| C | −2.273052 | −0.122903 | −0.369408 |
| C | −0.886785 | −2.195096 | −0.425648 |
| C | 1.592169 | 1.688092 | 0.030877 |
| C | 2.433768 | −0.524723 | −0.827732 |
| H | −2.539662 | −0.216123 | −1.424698 |
| H | −3.073475 | −0.494370 | 0.275628 |
| H | −2.226205 | 1.077683 | −0.160654 |
| H | 0.058274 | −2.663948 | −0.136291 |
| H | −1.699304 | −2.740647 | 0.065105 |
| H | −1.001085 | −2.299911 | −1.507937 |
| H | 1.638803 | 2.126411 | −0.971541 |
| H | 0.804336 | 2.196245 | 0.593548 |
| H | 2.550396 | 1.875362 | 0.526208 |
| H | 3.386814 | −0.424586 | −0.297202 |
| H | 2.215165 | −1.590098 | −0.942126 |
| H | 2.551437 | −0.092029 | −1.825786 |
| H | −0.859100 | −1.247939 | 2.100037 |
| H | −0.870908 | 0.493091 | 1.761127 |
| H | 1.460107 | −1.454342 | 1.377887 |
| H | 1.508777 | 0.137233 | 2.129702 |
| O | −1.803544 | 2.320489 | −0.102856 |
| H | −1.043472 | 2.174570 | −0.691328 |

**Table S32.** Optimised Cartesian coordinates in Ångström (Å) and energy, *E*SCF, in atomic units (a.u.) of the TMO∙∙∙OH transition state as calculated at the B3LYP/GTBas3 level.

| *E*SCF = *−*465.490695 | | | |
| --- | --- | --- | --- |
| O | −0.577450 | 0.239439 | −0.882944 |
| C | 0.681679 | 0.258070 | −0.177639 |
| C | 0.354476 | −0.214665 | 1.257000 |
| C | −1.134535 | 0.118131 | 1.403182 |
| C | −1.681894 | −0.104103 | −0.020824 |
| C | 1.612129 | −0.696699 | −0.915389 |
| C | 1.236716 | 1.685483 | −0.208229 |
| C | −2.077599 | −1.567901 | −0.267010 |
| C | −2.837908 | 0.831164 | −0.376393 |
| H | 1.850059 | −0.362411 | −1.928442 |
| H | 2.640549 | −0.721442 | −0.305717 |
| H | 1.253237 | −1.728985 | −0.925534 |
| H | 0.609840 | 2.362310 | 0.380035 |
| H | 2.252113 | 1.699728 | 0.198450 |
| H | 1.260403 | 2.056498 | −1.237368 |
| H | −2.277733 | −1.725877 | −1.330597 |
| H | −1.279409 | −2.253687 | 0.032250 |
| H | −2.979050 | −1.829724 | 0.297100 |
| H | −3.701594 | 0.641551 | 0.269412 |
| H | −2.534684 | 1.874811 | −0.256346 |
| H | −3.148561 | 0.682406 | −1.414884 |
| H | 0.984957 | 0.276011 | 2.001271 |
| H | 0.522017 | −1.292188 | 1.349786 |
| H | −1.270084 | 1.165310 | 1.693714 |
| H | −1.642146 | −0.500275 | 2.147954 |
| O | 3.853564 | −0.492831 | 0.300748 |
| H | 4.332795 | −0.173793 | −0.481693 |

**Table S33.** Optimised Cartesian coordinates in Ångström (Å) and energy, *E*SCF, in atomic units (a.u.) of the TMO∙∙∙OH transition state as calculated at the B3LYP/GTBas3 level.

| *E*SCF = *−*465.493429 | | | |
| --- | --- | --- | --- |
| O | −0.026998 | −0.551142 | 0.162598 |
| C | −0.810102 | 0.648625 | −0.037106 |
| C | 0.199334 | 1.682693 | −0.589764 |
| C | 1.531131 | 1.217728 | 0.011951 |
| C | 1.393087 | −0.319139 | 0.035170 |
| C | −1.913307 | 0.303875 | −1.021316 |
| C | −1.402649 | 1.073423 | 1.313655 |
| C | 1.873146 | −0.960376 | −1.274391 |
| C | 2.082160 | −0.964776 | 1.237473 |
| H | −2.477352 | −0.690291 | −0.573576 |
| H | −2.697144 | 1.060908 | −1.100995 |
| H | −1.543186 | −0.004388 | −2.001300 |
| H | −0.612746 | 1.311211 | 2.031793 |
| H | −2.039852 | 1.956652 | 1.198456 |
| H | −2.008484 | 0.257142 | 1.713922 |
| H | 1.593188 | −2.017453 | −1.298136 |
| H | 1.422562 | −0.472917 | −2.144134 |
| H | 2.961838 | −0.889792 | −1.368997 |
| H | 3.163048 | −0.793093 | 1.203292 |
| H | 1.693265 | −0.548752 | 2.170947 |
| H | 1.909834 | −2.045321 | 1.246578 |
| H | −0.067343 | 2.704733 | −0.310937 |
| H | 0.231910 | 1.635863 | −1.682873 |
| H | 1.647226 | 1.600183 | 1.031067 |
| H | 2.399206 | 1.546509 | −0.565039 |
| O | −2.669085 | −1.793136 | 0.102049 |
| H | −1.724099 | −1.949290 | 0.278725 |

**Table S34.** Optimised Cartesian coordinates in Ångström (Å) and energy, *E*SCF, in atomic units (a.u.) of the TMO∙∙∙OH transition state as calculated at the B3LYP/GTBas3 level.

| *E*SCF = *−*465.490085 | | | |
| --- | --- | --- | --- |
| O | −0.740606 | 0.910765 | 0.407684 |
| C | 0.665539 | 0.802387 | 0.103515 |
| C | 0.766575 | −0.468152 | −0.757406 |
| C | −0.409235 | −1.325032 | −0.312183 |
| C | −1.485273 | −0.262816 | 0.021939 |
| C | 1.093528 | 2.060941 | −0.652479 |
| C | 1.439060 | 0.674447 | 1.423847 |
| C | −2.339590 | 0.083875 | −1.205996 |
| C | −2.372026 | −0.662039 | 1.201360 |
| H | 0.931782 | 2.949470 | −0.035168 |
| H | 2.155379 | 2.011235 | −0.914136 |
| H | 0.512067 | 2.174106 | −1.571810 |
| H | 1.123166 | −0.217224 | 1.975328 |
| H | 2.514334 | 0.602394 | 1.239002 |
| H | 1.240302 | 1.543822 | 2.056757 |
| H | −2.961971 | 0.956783 | −0.989637 |
| H | −1.712285 | 0.322713 | −2.070087 |
| H | −2.995048 | −0.749992 | −1.479085 |
| H | −2.951017 | −1.561849 | 0.968272 |
| H | −1.763943 | −0.858645 | 2.088796 |
| H | −3.073218 | 0.143098 | 1.440761 |
| H | 1.812746 | −0.999046 | −0.613000 |
| H | 0.760278 | −0.251790 | −1.830568 |
| H | −0.159677 | −1.897170 | 0.588098 |
| H | −0.740757 | −2.034330 | −1.073669 |
| O | 3.037012 | −1.607222 | −0.315191 |
| H | 2.785141 | −1.983589 | 0.544628 |

**Table S35.** Optimised Cartesian coordinates in Ångström (Å) and energy, *E*SCF, in atomic units (a.u.) of the TMO∙∙∙OH transition state as calculated at the B3LYP/GTBas3 level.

| *E*SCF = *−*465.492792 | | | |
| --- | --- | --- | --- |
| O | 0.376550 | −0.744676 | −0.778323 |
| C | −0.892945 | −0.823337 | −0.110616 |
| C | −0.812904 | 0.218989 | 1.018365 |
| C | 0.680130 | 0.348433 | 1.296912 |
| C | 1.323689 | 0.091860 | −0.084508 |
| C | −1.993322 | −0.533824 | −1.133813 |
| C | −1.051678 | −2.243137 | 0.466163 |
| C | 1.503306 | 1.392848 | −0.881096 |
| C | 2.643240 | −0.675502 | 0.007927 |
| H | −1.954209 | −1.267162 | −1.944567 |
| H | −2.982295 | −0.588535 | −0.667286 |
| H | −1.865913 | 0.464681 | −1.556870 |
| H | −0.296499 | −2.447089 | 1.231124 |
| H | −2.042023 | −2.379407 | 0.912449 |
| H | −0.927472 | −2.976626 | −0.335679 |
| H | 1.777508 | 1.159019 | −1.913808 |
| H | 0.578081 | 1.975331 | −0.893748 |
| H | 2.298310 | 2.009279 | −0.446184 |
| H | 3.396819 | −0.092283 | 0.547739 |
| H | 2.499458 | −1.626380 | 0.529059 |
| H | 3.030650 | −0.890277 | −0.992430 |
| H | −1.425960 | −0.020830 | 1.890781 |
| H | −1.238185 | 1.212801 | 0.617455 |
| H | 0.994593 | −0.421027 | 2.012386 |
| H | 0.966120 | 1.315558 | 1.719657 |
| O | −1.641630 | 2.598347 | 0.156481 |
| H | −1.085438 | 3.085596 | 0.788655 |

**Table S36.** Optimised Cartesian coordinates in Ångström (Å) and energy, *E*SCF, in atomic units (a.u.) of the TMO∙∙∙OH post-reaction complex for as calculated at the B3LYP/GTBas3 level.

| *E*SCF = *−*465.514847 | | | |
| --- | --- | --- | --- |
| O | 0.486220 | −0.304630 | −0.886598 |
| C | −0.406598 | −1.128483 | −0.120216 |
| C | −0.419451 | −0.509603 | 1.304635 |
| C | 0.947601 | 0.179030 | 1.381544 |
| C | 1.187860 | 0.654808 | −0.066587 |
| C | −1.746437 | −1.127896 | −0.784536 |
| C | 0.163352 | −2.567151 | −0.100110 |
| C | 0.589507 | 2.045905 | −0.322840 |
| C | 2.661647 | 0.616878 | −0.471368 |
| H | −1.807905 | −0.884684 | −1.839607 |
| H | −2.574225 | −1.662227 | −0.327713 |
| H | −2.789703 | 0.795576 | −0.250973 |
| H | 1.117855 | −2.589834 | 0.435784 |
| H | −0.527209 | −3.258795 | 0.392704 |
| H | 0.336161 | −2.913721 | −1.122231 |
| H | 0.646154 | 2.281593 | −1.390160 |
| H | −0.459460 | 2.085629 | −0.016103 |
| H | 1.140132 | 2.816417 | 0.227577 |
| H | 3.248682 | 1.314882 | 0.134704 |
| H | 3.070527 | −0.388695 | −0.337948 |
| H | 2.778923 | 0.896348 | −1.522756 |
| H | −0.564566 | −1.268552 | 2.077499 |
| H | −1.225808 | 0.222132 | 1.392754 |
| H | 1.726528 | −0.532297 | 1.675919 |
| H | 0.966753 | 1.004692 | 2.097236 |
| O | −3.004286 | 1.657002 | 0.138593 |
| H | −2.803213 | 2.281632 | −0.565780 |

**Table S37.** Optimised Cartesian coordinates in Ångström (Å) and energy, *E*SCF, in atomic units (a.u.) of the TMO∙∙∙OH post-reaction complex for as calculated at the B3LYP/GTBas3 level.

| *E*SCF = *−*465.513873 | | | |
| --- | --- | --- | --- |
| O | −0.718180 | 0.456786 | −0.837166 |
| C | 0.638043 | 0.266207 | −0.339171 |
| C | 0.471206 | −0.563070 | 0.957891 |
| C | −0.960173 | −0.242817 | 1.399876 |
| C | −1.707827 | −0.082905 | 0.061661 |
| C | 1.397902 | −0.462246 | −1.401588 |
| C | 1.241202 | 1.648464 | −0.072571 |
| C | −2.209080 | −1.427844 | −0.486083 |
| C | −2.852903 | 0.928446 | 0.127905 |
| H | 1.926279 | 0.090008 | −2.173318 |
| H | 3.277013 | −0.728213 | −0.141281 |
| H | 1.156172 | −1.500347 | −1.609270 |
| H | 0.688682 | 2.167681 | 0.715824 |
| H | 2.284413 | 1.545258 | 0.240612 |
| H | 1.193874 | 2.260648 | −0.978178 |
| H | −2.566407 | −1.301758 | −1.512049 |
| H | −1.412339 | −2.177558 | −0.496641 |
| H | −3.032891 | −1.816506 | 0.122080 |
| H | −3.629221 | 0.589421 | 0.821802 |
| H | −2.483780 | 1.900875 | 0.465073 |
| H | −3.308976 | 1.058846 | −0.858022 |
| H | 1.232482 | −0.308348 | 1.697539 |
| H | 0.575232 | −1.630673 | 0.739678 |
| H | −0.991380 | 0.698431 | 1.958672 |
| H | −1.396302 | −1.019306 | 2.033818 |
| O | 3.942205 | −0.486919 | 0.520299 |
| H | 4.584725 | 0.027195 | 0.021068 |

**Table S38.** Optimised Cartesian coordinates in Ångström (Å) and energy, *E*SCF, in atomic units (a.u.) of the TMO∙∙∙OH post-reaction complex for as calculated at the B3LYP/GTBas3 level.

| *E*SCF = *−*465.519898 | | | |
| --- | --- | --- | --- |
| O | −0.139033 | −0.413542 | −0.241115 |
| C | −0.771807 | 0.885986 | −0.050943 |
| C | 0.431138 | 1.865253 | 0.012815 |
| C | 1.551298 | 1.005711 | 0.607258 |
| C | 1.287070 | −0.390900 | 0.007282 |
| C | −1.663825 | 1.132181 | −1.217998 |
| C | −1.570250 | 0.858011 | 1.260482 |
| C | 2.005745 | −0.588434 | −1.333804 |
| C | 1.616036 | −1.529794 | 0.972656 |
| H | −2.849476 | −1.888316 | −0.842650 |
| H | −2.673085 | 1.503762 | −1.091805 |
| H | −1.284765 | 0.971368 | −2.220817 |
| H | −0.907446 | 0.754482 | 2.124367 |
| H | −2.144057 | 1.783313 | 1.378467 |
| H | −2.257081 | 0.008011 | 1.246280 |
| H | 1.655550 | −1.506064 | −1.815031 |
| H | 1.811124 | 0.245877 | −2.014379 |
| H | 3.088287 | −0.666735 | −1.188740 |
| H | 2.683889 | −1.532927 | 1.215400 |
| H | 1.049040 | −1.421882 | 1.901289 |
| H | 1.365405 | −2.498287 | 0.529430 |
| H | 0.197521 | 2.750859 | 0.608039 |
| H | 0.692924 | 2.202178 | −0.994798 |
| H | 1.472825 | 0.968493 | 1.698284 |
| H | 2.549625 | 1.376284 | 0.360633 |
| O | −2.391381 | −2.176362 | −0.047420 |
| H | −1.519389 | −1.759259 | −0.132183 |

**Table S39.** Optimised Cartesian coordinates in Ångström (Å) and energy, *E*SCF, in atomic units (a.u.) of the TMO∙∙∙OH post-reaction complex for as calculated at the B3LYP/GTBas3 level.

| *E*SCF = *−*465.518624 | | | |
| --- | --- | --- | --- |
| O | −0.795398 | 0.590681 | 0.738206 |
| C | 0.509727 | 0.766202 | 0.157521 |
| C | 0.638817 | −0.372254 | −0.813860 |
| C | −0.554909 | −1.258481 | −0.730961 |
| C | −1.587123 | −0.375692 | 0.023145 |
| C | 0.604552 | 2.142153 | −0.530891 |
| C | 1.532580 | 0.691353 | 1.307358 |
| C | −2.524118 | 0.344050 | −0.958757 |
| C | −2.390780 | −1.149939 | 1.066789 |
| H | 0.393451 | 2.933696 | 0.194550 |
| H | 1.609766 | 2.301436 | −0.934356 |
| H | −0.112196 | 2.226997 | −1.351105 |
| H | 1.415277 | −0.250726 | 1.850779 |
| H | 2.552883 | 0.750207 | 0.918697 |
| H | 1.368399 | 1.513472 | 2.011266 |
| H | −3.106751 | 1.103852 | −0.430241 |
| H | −1.959268 | 0.837699 | −1.754953 |
| H | −3.218365 | −0.362614 | −1.426246 |
| H | −2.998197 | −1.927398 | 0.592084 |
| H | −1.720115 | −1.622502 | 1.789869 |
| H | −3.059942 | −0.477213 | 1.611343 |
| H | 2.885508 | −1.350842 | −0.329414 |
| H | 1.383446 | −0.395702 | −1.600165 |
| H | −0.348247 | −2.176993 | −0.157339 |
| H | −0.920578 | −1.586517 | −1.710688 |
| O | 3.837961 | −1.199767 | −0.356181 |
| H | 4.121942 | −1.368518 | 0.547659 |

**Table S40.** Optimised Cartesian coordinates in Ångström (Å) and energy, *E*SCF, in atomic units (a.u.) of the TMO∙∙∙OH post-reaction complex for as calculated at the B3LYP/GTBas3 level.

| *E*SCF = *−*465.521149 | | | |
| --- | --- | --- | --- |
| O | 0.706666 | −0.661886 | −0.714436 |
| C | −0.486229 | −1.150221 | −0.076334 |
| C | −0.636593 | −0.287337 | 1.145039 |
| C | 0.601270 | 0.518331 | 1.338493 |
| C | 1.234834 | 0.517117 | −0.076973 |
| C | −1.672055 | −1.048487 | −1.052795 |
| C | −0.239018 | −2.626902 | 0.297735 |
| C | 0.821542 | 1.761183 | −0.877791 |
| C | 2.755575 | 0.368426 | −0.049723 |
| H | −1.452034 | −1.622799 | −1.957890 |
| H | −2.581422 | −1.457343 | −0.599644 |
| H | −1.866213 | −0.011567 | −1.333719 |
| H | 0.603093 | −2.714802 | 0.989551 |
| H | −1.125048 | −3.067392 | 0.765591 |
| H | −0.002592 | −3.198907 | −0.604844 |
| H | 1.107339 | 1.638682 | −1.926320 |
| H | −0.259168 | 1.923387 | −0.831117 |
| H | 1.320168 | 2.656207 | −0.488288 |
| H | 3.221769 | 1.223318 | 0.451054 |
| H | 3.041090 | −0.545402 | 0.479018 |
| H | 3.151456 | 0.311325 | −1.067952 |
| H | −1.346594 | −0.515479 | 1.933330 |
| H | −2.192431 | 1.339529 | 0.594702 |
| H | 1.276996 | 0.036921 | 2.065835 |
| H | 0.419463 | 1.531015 | 1.717443 |
| O | −2.628052 | 2.074641 | 0.140113 |
| H | −2.220741 | 2.858594 | 0.521936 |

**Table S41.** Vibrational frequencies in cm−1 for OH as calculated at the B3LYP/CBSB7 leνel.

| ν1 | 3706.6890 |
| --- | --- |

**Table S42.** Vibrational frequencies in cm−1 for H2O as calculated at the B3LYP/CBSB7 leνel.

| ν1 | 1638.6237 |
| --- | --- |
| ν2 | 3809.9454 |
| ν3 | 3906.8630 |

**Table S43.** Vibrational frequencies in cm−1 for TMO as calculated at the B3LYP/CBSB7 leνel.

| ν1 | 44.5835 |
| --- | --- |
| ν2 | 157.1499 |
| ν3 | 217.5256 |
| ν4 | 220.1899 |
| ν5 | 240.7411 |
| ν6 | 258.7078 |
| ν7 | 283.8415 |
| ν8 | 301.1328 |
| ν9 | 345.0517 |
| ν10 | 361.9676 |
| ν11 | 368.0675 |
| sν12 | 421.5146 |
| ν13 | 447.0305 |
| ν14 | 480.5307 |
| ν15 | 581.2588 |
| ν16 | 588.9178 |
| ν17 | 738.9883 |
| ν18 | 769.3980 |
| ν19 | 850.0565 |
| ν20 | 897.9979 |
| ν21 | 910.3404 |
| ν22 | 921.5713 |
| ν23 | 930.9274 |
| ν24 | 949.6522 |
| ν25 | 975.4327 |
| ν26 | 999.7896 |
| ν27 | 1009.4004 |
| ν28 | 1010.8202 |
| ν29 | 1042.6191 |
| ν30 | 1095.5489 |
| ν31 | 1151.0021 |
| ν32 | 1164.1098 |
| ν33 | 1227.5900 |
| ν34 | 1234.2681 |
| ν35 | 1268.5802 |
| ν36 | 1280.6530 |
| ν37 | 1285.5183 |
| ν38 | 1336.9541 |
| ν39 | 1348.2768 |
| ν40 | 1397.4250 |
| ν41 | 1399.0429 |
| ν42 | 1414.3563 |
| ν43 | 1415.8367 |
| ν44 | 1476.4130 |
| ν45 | 1477.0797 |
| ν46 | 1485.8838 |
| ν47 | 1487.8471 |
| ν48 | 1494.3740 |
| ν49 | 1500.6000 |
| ν50 | 1501.4750 |
| ν51 | 1505.2144 |
| ν52 | 1506.1389 |
| ν53 | 1513.1335 |
| ν54 | 3023.9056 |
| ν55 | 3024.2240 |
| ν56 | 3029.3953 |
| ν57 | 3029.5438 |
| ν58 | 3041.7179 |
| ν59 | 3042.4474 |
| ν60 | 3082.5498 |
| ν61 | 3089.8247 |
| ν62 | 3090.3988 |
| ν63 | 3091.6613 |
| ν64 | 3095.3580 |
| ν65 | 3096.1600 |
| ν66 | 3102.0686 |
| ν67 | 3103.7399 |
| ν68 | 3104.5589 |
| ν69 | 3105.5557 |

**Table S44.** Vibrational frequencies in cm−1 for the primary TMO radical as calculated at the B3LYP/CBSB7 leνel.

| ν1 | 50.4145 |
| --- | --- |
| ν2 | 130.6248 |
| ν3 | 153.2185 |
| ν4 | 226.9328 |
| ν5 | 230.8680 |
| ν6 | 253.2227 |
| ν7 | 279.0719 |
| ν8 | 292.1847 |
| ν9 | 337.4533 |
| ν10 | 346.3229 |
| ν11 | 373.3333 |
| ν12 | 424.8315 |
| ν13 | 446.2971 |
| ν14 | 486.0754 |
| ν15 | 514.3468 |
| ν16 | 585.4569 |
| ν17 | 605.6255 |
| ν18 | 745.3067 |
| ν19 | 773.7875 |
| ν20 | 843.6931 |
| ν21 | 897.2760 |
| ν22 | 913.0211 |
| ν23 | 922.5789 |
| ν24 | 939.0468 |
| ν25 | 969.9438 |
| ν26 | 986.9840 |
| ν27 | 994.2152 |
| ν28 | 1010.4734 |
| ν29 | 1033.9467 |
| ν30 | 1086.5059 |
| ν31 | 1097.0662 |
| ν32 | 1154.6146 |
| ν33 | 1185.8360 |
| ν34 | 1230.2275 |
| ν35 | 1264.9741 |
| ν36 | 1272.3271 |
| ν37 | 1279.9597 |
| ν38 | 1328.9241 |
| ν39 | 1345.5795 |
| ν40 | 1394.3261 |
| ν41 | 1398.3222 |
| ν42 | 1414.9615 |
| ν43 | 1437.6812 |
| ν44 | 1477.3061 |
| ν45 | 1480.1211 |
| ν46 | 1486.5562 |
| ν47 | 1491.7944 |
| ν48 | 1495.4252 |
| ν49 | 1498.9340 |
| ν50 | 1502.7155 |
| ν51 | 1509.2907 |
| ν52 | 3022.7331 |
| ν53 | 3026.4676 |
| ν54 | 3028.2752 |
| ν55 | 3041.7164 |
| ν56 | 3044.0749 |
| ν57 | 3085.5040 |
| ν58 | 3088.9379 |
| ν59 | 3093.9372 |
| ν60 | 3094.6169 |
| ν61 | 3098.4715 |
| ν62 | 3102.4704 |
| ν63 | 3104.5120 |
| ν64 | 3107.2630 |
| ν65 | 3130.4443 |
| ν66 | 3243.1879 |

**Table S45.** Vibrational frequencies in cm−1 for the secondary TMO radical as calculated at the B3LYP/CBSB7 leνel.

| ν1 | 78.4252 |
| --- | --- |
| ν2 | 97.4001 |
| ν3 | 207.6332 |
| ν4 | 222.1366 |
| ν5 | 243.6799 |
| ν6 | 257.2581 |
| ν7 | 265.4521 |
| ν8 | 299.5085 |
| ν9 | 308.4659 |
| ν10 | 351.8149 |
| ν11 | 353.5851 |
| ν12 | 386.5649 |
| ν13 | 435.0673 |
| ν14 | 446.2349 |
| ν15 | 501.3327 |
| ν16 | 581.4279 |
| ν17 | 632.9523 |
| ν18 | 778.1177 |
| ν19 | 827.3263 |
| ν20 | 852.0054 |
| ν21 | 896.2332 |
| ν22 | 917.5280 |
| ν23 | 922.0892 |
| ν24 | 936.2294 |
| ν25 | 961.9602 |
| ν26 | 996.2629 |
| ν27 | 1002.7799 |
| ν28 | 1012.5610 |
| ν29 | 1018.8983 |
| ν30 | 1102.4653 |
| ν31 | 1161.4273 |
| ν32 | 1162.8814 |
| ν33 | 1174.9578 |
| ν34 | 1217.0728 |
| ν35 | 1263.6521 |
| ν36 | 1272.6158 |
| ν37 | 1316.9630 |
| ν38 | 1346.7981 |
| ν39 | 1386.8125 |
| ν40 | 1397.5661 |
| ν41 | 1408.8949 |
| ν42 | 1415.0504 |
| ν43 | 1468.7794 |
| ν44 | 1474.6546 |
| ν45 | 1480.8268 |
| ν46 | 1482.0007 |
| ν47 | 1488.4332 |
| ν48 | 1493.8495 |
| ν49 | 1500.7065 |
| ν50 | 1503.4660 |
| ν51 | 1509.8074 |
| ν52 | 2934.4255 |
| ν53 | 3024.0834 |
| ν54 | 3024.8148 |
| ν55 | 3029.9917 |
| ν56 | 3030.9592 |
| ν57 | 3035.1075 |
| ν58 | 3089.5421 |
| ν59 | 3090.5618 |
| ν60 | 3097.3238 |
| ν61 | 3098.5753 |
| ν62 | 3103.7254 |
| ν63 | 3106.3527 |
| ν64 | 3106.8117 |
| ν65 | 3113.5371 |
| ν66 | 3200.8374 |

**Table S46.** Vibrational frequencies in cm−1 for the TMO∙∙∙OH pre-reaction complex for as calculated at the B3LYP/CBSB7 leνel.

| ν1 | 15.9162 |
| --- | --- |
| ν2 | 43.7799 |
| ν3 | 61.9332 |
| ν4 | 158.7214 |
| ν5 | 171.0788 |
| ν6 | 223.8613 |
| ν7 | 232.7030 |
| ν8 | 250.0408 |
| ν9 | 268.9953 |
| ν10 | 289.8327 |
| ν11 | 301.7772 |
| ν12 | 345.6235 |
| ν13 | 367.9556 |
| ν14 | 372.4712 |
| ν15 | 420.7085 |
| ν16 | 450.8480 |
| ν17 | 467.6997 |
| ν18 | 489.5544 |
| ν19 | 580.4995 |
| ν20 | 588.5930 |
| ν21 | 720.3643 |
| ν22 | 744.4773 |
| ν23 | 777.9917 |
| ν24 | 848.7793 |
| ν25 | 890.7430 |
| ν26 | 915.1696 |
| ν27 | 927.5440 |
| ν28 | 935.3474 |
| ν29 | 952.3257 |
| ν30 | 977.4776 |
| ν31 | 994.4358 |
| ν32 | 1012.6570 |
| ν33 | 1013.7702 |
| ν34 | 1046.8037 |
| ν35 | 1099.5860 |
| ν36 | 1150.0782 |
| ν37 | 1161.7175 |
| ν38 | 1233.6408 |
| ν39 | 1236.4780 |
| ν40 | 1267.5780 |
| ν41 | 1285.7186 |
| ν42 | 1289.7812 |
| ν43 | 1340.6916 |
| ν44 | 1351.2387 |
| ν45 | 1401.1741 |
| ν46 | 1403.2569 |
| ν47 | 1419.5940 |
| ν48 | 1421.2113 |
| ν49 | 1476.5057 |
| ν50 | 1478.5676 |
| ν51 | 1486.7187 |
| ν52 | 1490.4894 |
| ν53 | 1497.0782 |
| ν54 | 1502.5310 |
| ν55 | 1504.4329 |
| ν56 | 1505.9908 |
| ν57 | 1508.7619 |
| ν58 | 1515.8777 |
| ν59 | 3027.1913 |
| ν60 | 3027.6020 |
| ν61 | 3032.3551 |
| ν62 | 3032.4173 |
| ν63 | 3044.5865 |
| ν64 | 3046.7594 |
| ν65 | 3087.1137 |
| ν66 | 3093.8485 |
| ν67 | 3094.6354 |
| ν68 | 3096.0468 |
| ν69 | 3099.5786 |
| ν70 | 3100.5055 |
| ν71 | 3104.9065 |
| ν72 | 3106.5265 |
| ν73 | 3107.5102 |
| ν74 | 3110.1521 |
| ν75 | 3480.5957 |

**Table S47.** Vibrational frequencies in cm−1 for the TMO∙∙∙OH pre-reaction complex for as calculated at the B3LYP/CBSB7 leνel.

| ν1 | 26.4281 |
| --- | --- |
| ν2 | 33.4038 |
| ν3 | 82.7532 |
| ν4 | 90.9954 |
| ν5 | 150.5465 |
| ν6 | 161.3790 |
| ν7 | 217.9895 |
| ν8 | 241.6564 |
| ν9 | 250.0717 |
| ν10 | 269.7270 |
| ν11 | 286.6897 |
| ν12 | 304.3724 |
| ν13 | 343.5883 |
| ν14 | 357.4022 |
| ν15 | 362.9937 |
| ν16 | 377.2432 |
| ν17 | 422.1367 |
| ν18 | 448.5540 |
| ν19 | 481.1979 |
| ν20 | 582.1089 |
| ν21 | 588.8308 |
| ν22 | 738.3027 |
| ν23 | 769.2987 |
| ν24 | 848.8725 |
| ν25 | 896.8193 |
| ν26 | 911.9775 |
| ν27 | 923.9404 |
| ν28 | 931.0700 |
| ν29 | 951.0661 |
| ν30 | 975.2308 |
| ν31 | 996.3165 |
| ν32 | 1010.0518 |
| ν33 | 1011.1389 |
| ν34 | 1039.8536 |
| ν35 | 1092.9775 |
| ν36 | 1149.6542 |
| ν37 | 1163.4183 |
| ν38 | 1228.0908 |
| ν39 | 1233.1699 |
| ν40 | 1264.7853 |
| ν41 | 1280.8166 |
| ν42 | 1286.6449 |
| ν43 | 1337.2599 |
| ν44 | 1348.5532 |
| ν45 | 1383.7134 |
| ν46 | 1398.0660 |
| ν47 | 1408.3169 |
| ν48 | 1414.9276 |
| ν49 | 1466.7869 |
| ν50 | 1476.7105 |
| ν51 | 1480.5756 |
| ν52 | 1486.1438 |
| ν53 | 1493.2230 |
| ν54 | 1500.1195 |
| ν55 | 1502.3760 |
| ν56 | 1505.2565 |
| ν57 | 1506.5259 |
| ν58 | 1511.9737 |
| ν59 | 2918.3645 |
| ν60 | 3024.0048 |
| ν61 | 3028.0177 |
| ν62 | 3029.3791 |
| ν63 | 3041.6358 |
| ν64 | 3044.0164 |
| ν65 | 3060.4826 |
| ν66 | 3084.9596 |
| ν67 | 3090.1619 |
| ν68 | 3093.2405 |
| ν69 | 3095.6370 |
| ν70 | 3097.7929 |
| ν71 | 3101.5789 |
| ν72 | 3103.1838 |
| ν73 | 3103.9277 |
| ν74 | 3105.0578 |
| ν75 | 3712.8299 |

**Table S48.** Vibrational frequencies in cm−1 for the TMO∙∙∙OH pre-reaction complex for as calculated at the B3LYP/CBSB7 leνel.

| ν1 | 15.9284 |
| --- | --- |
| ν2 | 43.7527 |
| ν3 | 61.8874 |
| ν4 | 158.6985 |
| ν5 | 171.0349 |
| ν6 | 223.8596 |
| ν7 | 232.6555 |
| ν8 | 250.0340 |
| ν9 | 268.9701 |
| ν10 | 289.8137 |
| ν11 | 301.7800 |
| ν12 | 345.6179 |
| ν13 | 367.9552 |
| ν14 | 372.4601 |
| ν15 | 420.7051 |
| ν16 | 450.8479 |
| ν17 | 467.6956 |
| ν18 | 489.5634 |
| ν19 | 580.5087 |
| ν20 | 588.5924 |
| ν21 | 720.2799 |
| ν22 | 744.4553 |
| ν23 | 777.9856 |
| ν24 | 848.8068 |
| ν25 | 890.7682 |
| ν26 | 915.1528 |
| ν27 | 927.5262 |
| ν28 | 935.3339 |
| ν29 | 952.3166 |
| ν30 | 977.4712 |
| ν31 | 994.4762 |
| ν32 | 1012.6537 |
| ν33 | 1013.7637 |
| ν34 | 1046.7943 |
| ν35 | 1099.5765 |
| ν36 | 1150.0831 |
| ν37 | 1161.7325 |
| ν38 | 1233.6227 |
| ν39 | 1236.4678 |
| ν40 | 1267.5858 |
| ν41 | 1285.7053 |
| ν42 | 1289.7645 |
| ν43 | 1340.6769 |
| ν44 | 1351.2234 |
| ν45 | 1401.1492 |
| ν46 | 1403.2482 |
| ν47 | 1419.5879 |
| ν48 | 1421.1914 |
| ν49 | 1476.4978 |
| ν50 | 1478.5666 |
| ν51 | 1486.7193 |
| ν52 | 1490.4820 |
| ν53 | 1497.0747 |
| ν54 | 1502.5250 |
| ν55 | 1504.4303 |
| ν56 | 1505.9882 |
| ν57 | 1508.7567 |
| ν58 | 1515.8738 |
| ν59 | 3027.2036 |
| ν60 | 3027.6224 |
| ν61 | 3032.3614 |
| ν62 | 3032.4458 |
| ν63 | 3044.5922 |
| ν64 | 3046.7856 |
| ν65 | 3087.1348 |
| ν66 | 3093.8640 |
| ν67 | 3094.6668 |
| ν68 | 3096.0661 |
| ν69 | 3099.5992 |
| ν70 | 3100.5418 |
| ν71 | 3104.9169 |
| ν72 | 3106.5310 |
| ν73 | 3107.5303 |
| ν74 | 3110.1674 |
| ν75 | 3480.6490 |

**Table S49.** Vibrational frequencies in cm−1 for the TMO∙∙∙OH pre-reaction complex for as calculated at the B3LYP/CBSB7 leνel.

| ν1 | 30.9437 |
| --- | --- |
| ν2 | 48.9031 |
| ν3 | 65.0141 |
| ν4 | 99.5518 |
| ν5 | 134.9645 |
| ν6 | 164.3138 |
| ν7 | 219.5816 |
| ν8 | 224.8564 |
| ν9 | 247.3089 |
| ν10 | 266.7569 |
| ν11 | 285.6657 |
| ν12 | 301.4149 |
| ν13 | 345.4453 |
| ν14 | 360.6923 |
| ν15 | 367.1090 |
| ν16 | 392.8809 |
| ν17 | 421.7900 |
| ν18 | 449.7824 |
| ν19 | 483.0001 |
| ν20 | 583.2242 |
| ν21 | 590.4643 |
| ν22 | 741.2093 |
| ν23 | 769.9756 |
| ν24 | 848.0983 |
| ν25 | 898.2344 |
| ν26 | 913.0079 |
| ν27 | 923.8661 |
| ν28 | 933.3484 |
| ν29 | 952.6965 |
| ν30 | 975.2588 |
| ν31 | 997.6447 |
| ν32 | 1003.9746 |
| ν33 | 1011.0413 |
| ν34 | 1040.9157 |
| ν35 | 1095.1804 |
| ν36 | 1150.5758 |
| ν37 | 1163.2836 |
| ν38 | 1227.4546 |
| ν39 | 1233.0737 |
| ν40 | 1267.7078 |
| ν41 | 1281.3098 |
| ν42 | 1286.2351 |
| ν43 | 1338.5581 |
| ν44 | 1348.1818 |
| ν45 | 1380.1492 |
| ν46 | 1398.2956 |
| ν47 | 1410.0205 |
| ν48 | 1415.2824 |
| ν49 | 1460.9465 |
| ν50 | 1476.3465 |
| ν51 | 1480.0661 |
| ν52 | 1486.8535 |
| ν53 | 1491.8493 |
| ν54 | 1497.7219 |
| ν55 | 1501.7763 |
| ν56 | 1503.1463 |
| ν57 | 1506.5826 |
| ν58 | 1514.6005 |
| ν59 | 2892.4018 |
| ν60 | 3024.1813 |
| ν61 | 3029.0301 |
| ν62 | 3029.7540 |
| ν63 | 3038.5709 |
| ν64 | 3044.0433 |
| ν65 | 3060.0309 |
| ν66 | 3085.2996 |
| ν67 | 3090.4925 |
| ν68 | 3096.3082 |
| ν69 | 3097.3278 |
| ν70 | 3099.6475 |
| ν71 | 3101.0527 |
| ν72 | 3103.2744 |
| ν73 | 3104.8430 |
| ν74 | 3106.0331 |
| ν75 | 3714.9731 |

**Table S50.** Vibrational frequencies in cm−1 for the TMO∙∙∙OH pre-reaction complex for as calculated at the B3LYP/CBSB7 leνel.

| ν1 | 45.5413 |
| --- | --- |
| ν2 | 56.5411 |
| ν3 | 61.6657 |
| ν4 | 93.9172 |
| ν5 | 146.7396 |
| ν6 | 169.4925 |
| ν7 | 216.8177 |
| ν8 | 224.2453 |
| ν9 | 247.6423 |
| ν10 | 275.5508 |
| ν11 | 287.4543 |
| ν12 | 304.2300 |
| ν13 | 349.2861 |
| ν14 | 365.2274 |
| ν15 | 369.7181 |
| ν16 | 425.0536 |
| ν17 | 444.8223 |
| ν18 | 469.6312 |
| ν19 | 484.6347 |
| ν20 | 581.2699 |
| ν21 | 591.7875 |
| ν22 | 737.3291 |
| ν23 | 771.8282 |
| ν24 | 850.8170 |
| ν25 | 893.9823 |
| ν26 | 908.2766 |
| ν27 | 919.3989 |
| ν28 | 934.2438 |
| ν29 | 953.8102 |
| ν30 | 974.7235 |
| ν31 | 999.8081 |
| ν32 | 1011.0372 |
| ν33 | 1011.8269 |
| ν34 | 1040.9368 |
| ν35 | 1098.0165 |
| ν36 | 1150.8723 |
| ν37 | 1162.4655 |
| ν38 | 1222.6009 |
| ν39 | 1225.7244 |
| ν40 | 1262.9155 |
| ν41 | 1274.5090 |
| ν42 | 1280.0066 |
| ν43 | 1322.4725 |
| ν44 | 1336.1879 |
| ν45 | 1394.9825 |
| ν46 | 1400.2849 |
| ν47 | 1414.4324 |
| ν48 | 1416.7192 |
| ν49 | 1430.2486 |
| ν50 | 1478.2130 |
| ν51 | 1480.9600 |
| ν52 | 1486.1636 |
| ν53 | 1490.1564 |
| ν54 | 1495.6370 |
| ν55 | 1499.7596 |
| ν56 | 1503.1532 |
| ν57 | 1506.6391 |
| ν58 | 1515.7572 |
| ν59 | 2653.5251 |
| ν60 | 3022.6219 |
| ν61 | 3026.0387 |
| ν62 | 3028.0723 |
| ν63 | 3033.3530 |
| ν64 | 3035.6438 |
| ν65 | 3077.1684 |
| ν66 | 3081.2775 |
| ν67 | 3089.9355 |
| ν68 | 3092.9893 |
| ν69 | 3096.6866 |
| ν70 | 3098.4122 |
| ν71 | 3103.4877 |
| ν72 | 3104.8856 |
| ν73 | 3111.6376 |
| ν74 | 3118.1342 |
| ν75 | 3719.6448 |

**Table S51.** Vibrational frequencies in cm−1 for the TMO∙∙∙OH transition state as calculated at the B3LYP/CBSB7 leνel.

| ν1 | -899.8473 |
| --- | --- |
| ν2 | 54.9896 |
| ν3 | 79.7150 |
| ν4 | 116.6282 |
| ν5 | 158.5320 |
| ν6 | 227.2491 |
| ν7 | 235.0023 |
| ν8 | 253.4708 |
| ν9 | 277.6147 |
| ν10 | 283.2686 |
| ν11 | 330.1726 |
| ν12 | 344.1958 |
| ν13 | 367.6685 |
| ν14 | 395.9998 |
| ν15 | 410.4769 |
| ν16 | 435.9666 |
| ν17 | 452.1112 |
| ν18 | 492.8190 |
| ν19 | 577.4441 |
| ν20 | 592.1665 |
| ν21 | 738.4970 |
| ν22 | 761.5889 |
| ν23 | 771.0625 |
| ν24 | 853.3456 |
| ν25 | 894.5452 |
| ν26 | 916.0321 |
| ν27 | 925.3735 |
| ν28 | 932.7257 |
| ν29 | 939.2544 |
| ν30 | 957.0229 |
| ν31 | 974.7202 |
| ν32 | 1000.1507 |
| ν33 | 1005.7757 |
| ν34 | 1013.2937 |
| ν35 | 1050.8356 |
| ν36 | 1098.7686 |
| ν37 | 1151.2897 |
| ν38 | 1166.2002 |
| ν39 | 1216.7567 |
| ν40 | 1229.4647 |
| ν41 | 1266.3532 |
| ν42 | 1272.5731 |
| ν43 | 1289.9249 |
| ν44 | 1294.6674 |
| ν45 | 1339.1992 |
| ν46 | 1356.2684 |
| ν47 | 1398.5049 |
| ν48 | 1401.7446 |
| ν49 | 1417.8439 |
| ν50 | 1450.6738 |
| ν51 | 1465.9129 |
| ν52 | 1479.5309 |
| ν53 | 1485.5798 |
| ν54 | 1490.7031 |
| ν55 | 1494.1755 |
| ν56 | 1500.3970 |
| ν57 | 1502.6642 |
| ν58 | 1509.4030 |
| ν59 | 1517.5182 |
| ν60 | 3024.6505 |
| ν61 | 3029.7626 |
| ν62 | 3030.1372 |
| ν63 | 3045.4966 |
| ν64 | 3053.7466 |
| ν65 | 3065.0631 |
| ν66 | 3086.0554 |
| ν67 | 3090.0803 |
| ν68 | 3095.7647 |
| ν69 | 3097.9355 |
| ν70 | 3101.5574 |
| ν71 | 3105.0502 |
| ν72 | 3107.7280 |
| ν73 | 3109.0863 |
| ν74 | 3137.4301 |
| ν75 | 3732.1347 |

**Table S52.** Vibrational frequencies in cm−1 for the TMO∙∙∙OH transition state as calculated at the B3LYP/CBSB7 leνel.

| ν1 | -464.9455 |
| --- | --- |
| ν2 | 42.4538 |
| ν3 | 54.4418 |
| ν4 | 106.3224 |
| ν5 | 151.1958 |
| ν6 | 168.5239 |
| ν7 | 216.5333 |
| ν8 | 238.7436 |
| ν9 | 268.3569 |
| ν10 | 273.0013 |
| ν11 | 296.4580 |
| ν12 | 339.1578 |
| ν13 | 362.2358 |
| ν14 | 366.3130 |
| ν15 | 390.2266 |
| ν16 | 416.9236 |
| ν17 | 452.5691 |
| ν18 | 478.2573 |
| ν19 | 583.9326 |
| ν20 | 593.6228 |
| ν21 | 739.0679 |
| ν22 | 768.5261 |
| ν23 | 792.8383 |
| ν24 | 854.6524 |
| ν25 | 893.7555 |
| ν26 | 914.8156 |
| ν27 | 923.9101 |
| ν28 | 937.0499 |
| ν29 | 952.8802 |
| ν30 | 971.9767 |
| ν31 | 987.8483 |
| ν32 | 1010.4381 |
| ν33 | 1015.9339 |
| ν34 | 1027.2176 |
| ν35 | 1084.6298 |
| ν36 | 1124.0938 |
| ν37 | 1158.0961 |
| ν38 | 1204.2540 |
| ν39 | 1228.4957 |
| ν40 | 1234.9787 |
| ν41 | 1269.4450 |
| ν42 | 1286.0433 |
| ν43 | 1287.3107 |
| ν44 | 1303.5256 |
| ν45 | 1338.6450 |
| ν46 | 1350.0105 |
| ν47 | 1398.6991 |
| ν48 | 1404.9166 |
| ν49 | 1415.4646 |
| ν50 | 1428.4746 |
| ν51 | 1465.5962 |
| ν52 | 1476.9665 |
| ν53 | 1485.9770 |
| ν54 | 1492.9976 |
| ν55 | 1497.4846 |
| ν56 | 1500.4956 |
| ν57 | 1504.2911 |
| ν58 | 1506.6107 |
| ν59 | 1512.5873 |
| ν60 | 3026.1925 |
| ν61 | 3030.6744 |
| ν62 | 3031.2919 |
| ν63 | 3042.0341 |
| ν64 | 3050.2449 |
| ν65 | 3064.2933 |
| ν66 | 3087.7359 |
| ν67 | 3092.4634 |
| ν68 | 3098.0019 |
| ν69 | 3098.9286 |
| ν70 | 3102.6188 |
| ν71 | 3105.8748 |
| ν72 | 3107.2203 |
| ν73 | 3109.1736 |
| ν74 | 3131.5855 |
| ν75 | 3746.8302 |

**Table S53.** Vibrational frequencies in cm−1 for the TMO∙∙∙OH transition state as calculated at the B3LYP/CBSB7 leνel.

| ν1 | -1038.0355 |
| --- | --- |
| ν2 | 45.1527 |
| ν3 | 78.3549 |
| ν4 | 110.9901 |
| ν5 | 168.9844 |
| ν6 | 221.9620 |
| ν7 | 240.3234 |
| ν8 | 264.3620 |
| ν9 | 273.2727 |
| ν10 | 300.6993 |
| ν11 | 329.1443 |
| ν12 | 352.5367 |
| ν13 | 366.0217 |
| ν14 | 400.8204 |
| ν15 | 422.6230 |
| ν16 | 445.8611 |
| ν17 | 463.6135 |
| ν18 | 483.0983 |
| ν19 | 580.8409 |
| ν20 | 588.3452 |
| ν21 | 706.7986 |
| ν22 | 755.3561 |
| ν23 | 769.6179 |
| ν24 | 862.0333 |
| ν25 | 894.8637 |
| ν26 | 913.4467 |
| ν27 | 929.1429 |
| ν28 | 933.0946 |
| ν29 | 943.7824 |
| ν30 | 952.7115 |
| ν31 | 979.1158 |
| ν32 | 999.5661 |
| ν33 | 1010.2446 |
| ν34 | 1029.7430 |
| ν35 | 1067.2053 |
| ν36 | 1104.7869 |
| ν37 | 1150.0252 |
| ν38 | 1163.0773 |
| ν39 | 1216.3968 |
| ν40 | 1235.0925 |
| ν41 | 1257.6836 |
| ν42 | 1266.2289 |
| ν43 | 1286.2559 |
| ν44 | 1289.4185 |
| ν45 | 1333.9249 |
| ν46 | 1347.6046 |
| ν47 | 1400.8717 |
| ν48 | 1408.2151 |
| ν49 | 1417.6509 |
| ν50 | 1448.7419 |
| ν51 | 1477.7724 |
| ν52 | 1483.3894 |
| ν53 | 1485.8438 |
| ν54 | 1493.5960 |
| ν55 | 1496.7776 |
| ν56 | 1500.5883 |
| ν57 | 1505.1914 |
| ν58 | 1507.2412 |
| ν59 | 1511.6146 |
| ν60 | 3026.3488 |
| ν61 | 3031.1497 |
| ν62 | 3031.5793 |
| ν63 | 3045.1541 |
| ν64 | 3046.4960 |
| ν65 | 3066.0676 |
| ν66 | 3087.5113 |
| ν67 | 3092.5694 |
| ν68 | 3097.2173 |
| ν69 | 3097.7646 |
| ν70 | 3099.2775 |
| ν71 | 3104.8545 |
| ν72 | 3106.7933 |
| ν73 | 3120.8773 |
| ν74 | 3142.4511 |
| ν75 | 3701.8545 |

**Table S54.** Vibrational frequencies in cm−1 for the TMO∙∙∙OH transition state as calculated at the B3LYP/CBSB7 leνel.

| ν1 | -336.7163 |
| --- | --- |
| ν2 | 32.9421 |
| ν3 | 65.7058 |
| ν4 | 95.7816 |
| ν5 | 153.0208 |
| ν6 | 177.5002 |
| ν7 | 217.4420 |
| ν8 | 222.7558 |
| ν9 | 244.9232 |
| ν10 | 267.5105 |
| ν11 | 280.2835 |
| ν12 | 301.6973 |
| ν13 | 335.7185 |
| ν14 | 365.9767 |
| ν15 | 369.3006 |
| ν16 | 412.6255 |
| ν17 | 452.4528 |
| ν18 | 474.4364 |
| ν19 | 577.8190 |
| ν20 | 579.0769 |
| ν21 | 695.1369 |
| ν22 | 759.0032 |
| ν23 | 785.8282 |
| ν24 | 848.7943 |
| ν25 | 903.8948 |
| ν26 | 919.6035 |
| ν27 | 924.8490 |
| ν28 | 934.4046 |
| ν29 | 959.5080 |
| ν30 | 972.8665 |
| ν31 | 999.0910 |
| ν32 | 1010.1617 |
| ν33 | 1017.7387 |
| ν34 | 1044.6130 |
| ν35 | 1072.1044 |
| ν36 | 1131.6263 |
| ν37 | 1160.7029 |
| ν38 | 1206.8030 |
| ν39 | 1225.9108 |
| ν40 | 1233.9360 |
| ν41 | 1268.6141 |
| ν42 | 1278.1883 |
| ν43 | 1316.7852 |
| ν44 | 1340.1796 |
| ν45 | 1357.6025 |
| ν46 | 1398.3165 |
| ν47 | 1399.5991 |
| ν48 | 1415.3004 |
| ν49 | 1417.6628 |
| ν50 | 1476.3336 |
| ν51 | 1481.4534 |
| ν52 | 1486.7583 |
| ν53 | 1487.3262 |
| ν54 | 1491.4973 |
| ν55 | 1497.1349 |
| ν56 | 1500.4440 |
| ν57 | 1506.6337 |
| ν58 | 1511.1958 |
| ν59 | 1519.1463 |
| ν60 | 3025.3085 |
| ν61 | 3028.1392 |
| ν62 | 3030.3500 |
| ν63 | 3032.7509 |
| ν64 | 3038.7384 |
| ν65 | 3062.7741 |
| ν66 | 3091.2997 |
| ν67 | 3094.9827 |
| ν68 | 3096.9734 |
| ν69 | 3097.7664 |
| ν70 | 3099.3112 |
| ν71 | 3104.5473 |
| ν72 | 3105.5456 |
| ν73 | 3106.4542 |
| ν74 | 3113.9703 |
| ν75 | 3746.8283 |

**Table S55.** Vibrational frequencies in cm−1 for the TMO∙∙∙OH transition state as calculated at the B3LYP/CBSB7 leνel.

| ν1 | -108.7904 |
| --- | --- |
| ν2 | 47.9126 |
| ν3 | 84.8784 |
| ν4 | 104.2131 |
| ν5 | 148.1075 |
| ν6 | 171.8901 |
| ν7 | 216.8989 |
| ν8 | 224.9016 |
| ν9 | 249.0869 |
| ν10 | 276.9324 |
| ν11 | 289.4478 |
| ν12 | 304.1413 |
| ν13 | 350.7987 |
| ν14 | 366.1227 |
| ν15 | 369.5372 |
| ν16 | 430.2248 |
| ν17 | 447.1153 |
| ν18 | 485.0278 |
| ν19 | 580.0218 |
| ν20 | 589.8635 |
| ν21 | 637.4781 |
| ν22 | 741.0622 |
| ν23 | 776.0464 |
| ν24 | 851.0380 |
| ν25 | 893.5737 |
| ν26 | 907.9152 |
| ν27 | 917.8558 |
| ν28 | 935.0199 |
| ν29 | 955.3352 |
| ν30 | 975.4294 |
| ν31 | 999.4598 |
| ν32 | 1011.2468 |
| ν33 | 1013.7551 |
| ν34 | 1041.5263 |
| ν35 | 1112.6025 |
| ν36 | 1151.1347 |
| ν37 | 1162.1041 |
| ν38 | 1215.8357 |
| ν39 | 1224.3918 |
| ν40 | 1261.5606 |
| ν41 | 1276.8048 |
| ν42 | 1277.3925 |
| ν43 | 1318.7845 |
| ν44 | 1333.6945 |
| ν45 | 1364.9176 |
| ν46 | 1393.5358 |
| ν47 | 1401.5991 |
| ν48 | 1415.6616 |
| ν49 | 1418.7196 |
| ν50 | 1478.1812 |
| ν51 | 1479.8049 |
| ν52 | 1485.3558 |
| ν53 | 1488.6014 |
| ν54 | 1493.7611 |
| ν55 | 1498.0517 |
| ν56 | 1503.9576 |
| ν57 | 1506.3100 |
| ν58 | 1516.4728 |
| ν59 | 2026.3652 |
| ν60 | 3023.0227 |
| ν61 | 3024.7039 |
| ν62 | 3027.1110 |
| ν63 | 3031.5698 |
| ν64 | 3035.4785 |
| ν65 | 3076.6013 |
| ν66 | 3085.7101 |
| ν67 | 3090.4194 |
| ν68 | 3094.9711 |
| ν69 | 3097.3587 |
| ν70 | 3099.7271 |
| ν71 | 3103.9800 |
| ν72 | 3105.4950 |
| ν73 | 3115.1777 |
| ν74 | 3124.1499 |
| ν75 | 3734.8662 |

**Table S56.** Vibrational frequencies in cm−1 for the TMO∙∙∙OH post-reaction complex for as calculated at the B3LYP/CBSB7 leνel.

| ν1 | 41.2018 |
| --- | --- |
| ν2 | 71.7739 |
| ν3 | 84.9557 |
| ν4 | 103.4521 |
| ν5 | 146.6429 |
| ν6 | 158.1843 |
| ν7 | 215.0563 |
| ν8 | 221.6529 |
| ν9 | 252.1241 |
| ν10 | 258.4316 |
| ν11 | 273.2545 |
| ν12 | 290.1910 |
| ν13 | 304.7993 |
| ν14 | 341.9645 |
| ν15 | 353.3275 |
| ν16 | 366.5433 |
| ν17 | 420.8280 |
| ν18 | 435.7679 |
| ν19 | 447.5762 |
| ν20 | 482.5675 |
| ν21 | 578.5797 |
| ν22 | 590.9267 |
| ν23 | 635.0083 |
| ν24 | 740.6381 |
| ν25 | 764.9542 |
| ν26 | 839.1847 |
| ν27 | 900.8489 |
| ν28 | 913.3605 |
| ν29 | 930.3283 |
| ν30 | 940.6004 |
| ν31 | 962.0547 |
| ν32 | 990.5815 |
| ν33 | 994.2246 |
| ν34 | 1012.8007 |
| ν35 | 1027.1375 |
| ν36 | 1072.8687 |
| ν37 | 1143.9615 |
| ν38 | 1164.0141 |
| ν39 | 1179.5699 |
| ν40 | 1228.4203 |
| ν41 | 1260.7656 |
| ν42 | 1266.0552 |
| ν43 | 1280.3866 |
| ν44 | 1338.4596 |
| ν45 | 1358.7194 |
| ν46 | 1392.7331 |
| ν47 | 1401.6950 |
| ν48 | 1418.3928 |
| ν49 | 1436.2449 |
| ν50 | 1479.1786 |
| ν51 | 1483.2488 |
| ν52 | 1490.0281 |
| ν53 | 1492.0050 |
| ν54 | 1499.5455 |
| ν55 | 1504.4673 |
| ν56 | 1511.6914 |
| ν57 | 1519.4066 |
| ν58 | 1633.5963 |
| ν59 | 3025.1440 |
| ν60 | 3025.3520 |
| ν61 | 3030.3659 |
| ν62 | 3040.6608 |
| ν63 | 3060.4569 |
| ν64 | 3086.4445 |
| ν65 | 3090.7447 |
| ν66 | 3093.3089 |
| ν67 | 3098.5030 |
| ν68 | 3103.3260 |
| ν69 | 3106.2945 |
| ν70 | 3109.8998 |
| ν71 | 3113.2347 |
| ν72 | 3123.8358 |
| ν73 | 3236.4209 |
| ν74 | 3716.5356 |
| ν75 | 3873.7610 |

**Table S57.** Vibrational frequencies in cm−1 for the TMO∙∙∙OH post-reaction complex for as calculated at the B3LYP/CBSB7 leνel.

| ν1 | 29.1371 |
| --- | --- |
| ν2 | 42.8535 |
| ν3 | 86.0337 |
| ν4 | 107.0017 |
| ν5 | 163.0404 |
| ν6 | 164.4327 |
| ν7 | 195.7342 |
| ν8 | 215.2504 |
| ν9 | 243.2542 |
| ν10 | 256.7872 |
| ν11 | 276.0357 |
| ν12 | 284.3247 |
| ν13 | 307.4614 |
| ν14 | 342.4006 |
| ν15 | 362.7602 |
| ν16 | 374.1245 |
| ν17 | 405.6813 |
| ν18 | 417.3421 |
| ν19 | 445.0219 |
| ν20 | 477.2250 |
| ν21 | 581.5053 |
| ν22 | 598.6215 |
| ν23 | 675.5549 |
| ν24 | 745.9581 |
| ν25 | 764.8004 |
| ν26 | 845.7514 |
| ν27 | 891.9685 |
| ν28 | 913.1832 |
| ν29 | 917.9961 |
| ν30 | 940.0550 |
| ν31 | 961.7193 |
| ν32 | 967.6989 |
| ν33 | 986.8182 |
| ν34 | 1009.0425 |
| ν35 | 1026.3285 |
| ν36 | 1084.2296 |
| ν37 | 1118.5369 |
| ν38 | 1155.6068 |
| ν39 | 1223.9285 |
| ν40 | 1236.0301 |
| ν41 | 1254.3543 |
| ν42 | 1281.8358 |
| ν43 | 1289.7305 |
| ν44 | 1336.0860 |
| ν45 | 1350.2956 |
| ν46 | 1398.4591 |
| ν47 | 1404.7373 |
| ν48 | 1415.2236 |
| ν49 | 1455.7555 |
| ν50 | 1476.6307 |
| ν51 | 1486.0558 |
| ν52 | 1493.4435 |
| ν53 | 1495.8789 |
| ν54 | 1499.9506 |
| ν55 | 1502.8052 |
| ν56 | 1506.8260 |
| ν57 | 1513.5039 |
| ν58 | 1638.5029 |
| ν59 | 3025.7722 |
| ν60 | 3030.9716 |
| ν61 | 3032.7772 |
| ν62 | 3042.4386 |
| ν63 | 3048.4800 |
| ν64 | 3087.7474 |
| ν65 | 3091.9585 |
| ν66 | 3097.6445 |
| ν67 | 3103.3308 |
| ν68 | 3104.1204 |
| ν69 | 3106.9532 |
| ν70 | 3108.7242 |
| ν71 | 3110.8359 |
| ν72 | 3117.7709 |
| ν73 | 3221.5827 |
| ν74 | 3726.2858 |
| ν75 | 3871.6035 |

**Table S58.** Vibrational frequencies in cm−1 for the TMO∙∙∙OH post-reaction complex for as calculated at the B3LYP/CBSB7 leνel.

| ν1 | 39.5668 |
| --- | --- |
| ν2 | 46.6171 |
| ν3 | 73.5279 |
| ν4 | 92.6555 |
| ν5 | 150.4027 |
| ν6 | 170.5439 |
| ν7 | 215.1835 |
| ν8 | 224.6387 |
| ν9 | 249.0770 |
| ν10 | 275.7678 |
| ν11 | 297.1289 |
| ν12 | 303.3806 |
| ν13 | 309.6214 |
| ν14 | 342.6986 |
| ν15 | 366.9918 |
| ν16 | 369.0143 |
| ν17 | 418.2195 |
| ν18 | 440.2969 |
| ν19 | 478.6691 |
| ν20 | 528.2042 |
| ν21 | 581.8180 |
| ν22 | 596.2030 |
| ν23 | 642.1438 |
| ν24 | 745.7307 |
| ν25 | 770.0437 |
| ν26 | 850.9301 |
| ν27 | 886.4097 |
| ν28 | 913.3399 |
| ν29 | 925.2895 |
| ν30 | 934.6426 |
| ν31 | 960.1976 |
| ν32 | 976.3193 |
| ν33 | 985.4559 |
| ν34 | 1009.7375 |
| ν35 | 1030.6177 |
| ν36 | 1089.1452 |
| ν37 | 1133.2752 |
| ν38 | 1150.5266 |
| ν39 | 1204.1149 |
| ν40 | 1239.1289 |
| ν41 | 1254.3996 |
| ν42 | 1267.4914 |
| ν43 | 1288.1035 |
| ν44 | 1329.6612 |
| ν45 | 1347.7782 |
| ν46 | 1401.5234 |
| ν47 | 1410.6219 |
| ν48 | 1418.4248 |
| ν49 | 1450.3462 |
| ν50 | 1477.9562 |
| ν51 | 1485.6900 |
| ν52 | 1490.5729 |
| ν53 | 1498.7007 |
| ν54 | 1500.7271 |
| ν55 | 1504.3703 |
| ν56 | 1509.4283 |
| ν57 | 1514.1904 |
| ν58 | 1671.9297 |
| ν59 | 3026.8322 |
| ν60 | 3029.8762 |
| ν61 | 3032.0407 |
| ν62 | 3046.5332 |
| ν63 | 3050.4105 |
| ν64 | 3087.8938 |
| ν65 | 3093.1466 |
| ν66 | 3098.0282 |
| ν67 | 3098.6565 |
| ν68 | 3101.6786 |
| ν69 | 3105.7791 |
| ν70 | 3108.4229 |
| ν71 | 3118.8311 |
| ν72 | 3138.8573 |
| ν73 | 3249.9675 |
| ν74 | 3699.5267 |
| ν75 | 3867.1631 |

**Table S59.** Vibrational frequencies in cm−1 for the TMO∙∙∙OH post-reaction complex for as calculated at the B3LYP/CBSB7 leνel.

| ν1 | 20.9217 |
| --- | --- |
| ν2 | 53.9322 |
| ν3 | 73.8721 |
| ν4 | 84.5315 |
| ν5 | 87.5882 |
| ν6 | 136.8639 |
| ν7 | 191.8136 |
| ν8 | 216.3747 |
| ν9 | 225.8383 |
| ν10 | 252.2287 |
| ν11 | 261.9739 |
| ν12 | 278.6404 |
| ν13 | 304.4276 |
| ν14 | 312.2423 |
| ν15 | 345.5909 |
| ν16 | 352.5501 |
| ν17 | 361.9014 |
| ν18 | 401.1434 |
| ν19 | 447.5267 |
| ν20 | 449.2318 |
| ν21 | 504.0356 |
| ν22 | 582.4755 |
| ν23 | 627.1100 |
| ν24 | 777.6308 |
| ν25 | 824.3345 |
| ν26 | 852.8583 |
| ν27 | 892.7768 |
| ν28 | 920.9582 |
| ν29 | 924.2643 |
| ν30 | 935.5902 |
| ν31 | 960.9162 |
| ν32 | 996.8366 |
| ν33 | 1006.2778 |
| ν34 | 1013.2889 |
| ν35 | 1022.2193 |
| ν36 | 1106.5114 |
| ν37 | 1158.8360 |
| ν38 | 1165.0222 |
| ν39 | 1178.2059 |
| ν40 | 1216.1861 |
| ν41 | 1263.8701 |
| ν42 | 1273.5181 |
| ν43 | 1314.4808 |
| ν44 | 1343.6775 |
| ν45 | 1389.1614 |
| ν46 | 1398.4159 |
| ν47 | 1410.9653 |
| ν48 | 1415.1813 |
| ν49 | 1469.1218 |
| ν50 | 1476.9647 |
| ν51 | 1482.0971 |
| ν52 | 1483.2947 |
| ν53 | 1489.1765 |
| ν54 | 1495.1364 |
| ν55 | 1501.5866 |
| ν56 | 1505.8637 |
| ν57 | 1511.3100 |
| ν58 | 1644.1248 |
| ν59 | 2943.0507 |
| ν60 | 3025.2845 |
| ν61 | 3027.4927 |
| ν62 | 3031.4327 |
| ν63 | 3032.9975 |
| ν64 | 3039.7162 |
| ν65 | 3090.9281 |
| ν66 | 3095.9319 |
| ν67 | 3098.6661 |
| ν68 | 3099.4857 |
| ν69 | 3104.2494 |
| ν70 | 3107.1619 |
| ν71 | 3113.6881 |
| ν72 | 3114.6377 |
| ν73 | 3198.8164 |
| ν74 | 3788.5000 |
| ν75 | 3888.9842 |

**Table S60.** Vibrational frequencies in cm−1 for the TMO∙∙∙OH post-reaction complex for as calculated at the B3LYP/CBSB7 leνel.

| ν1 | 48.6912 |
| --- | --- |
| ν2 | 61.6542 |
| ν3 | 81.5388 |
| ν4 | 101.9897 |
| ν5 | 125.9135 |
| ν6 | 167.9416 |
| ν7 | 212.5092 |
| ν8 | 224.6128 |
| ν9 | 239.3245 |
| ν10 | 253.2705 |
| ν11 | 279.3566 |
| ν12 | 287.7857 |
| ν13 | 308.4962 |
| ν14 | 330.2888 |
| ν15 | 359.2778 |
| ν16 | 364.5377 |
| ν17 | 395.8464 |
| ν18 | 422.0087 |
| ν19 | 447.0280 |
| ν20 | 470.7616 |
| ν21 | 529.0666 |
| ν22 | 581.6367 |
| ν23 | 642.5572 |
| ν24 | 778.2578 |
| ν25 | 830.0052 |
| ν26 | 852.2997 |
| ν27 | 895.7149 |
| ν28 | 918.6176 |
| ν29 | 923.9771 |
| ν30 | 942.2797 |
| ν31 | 966.1137 |
| ν32 | 998.1131 |
| ν33 | 1006.4567 |
| ν34 | 1010.1701 |
| ν35 | 1019.9919 |
| ν36 | 1102.1780 |
| ν37 | 1162.9150 |
| ν38 | 1163.6373 |
| ν39 | 1175.6436 |
| ν40 | 1217.9077 |
| ν41 | 1263.2986 |
| ν42 | 1271.2424 |
| ν43 | 1316.6619 |
| ν44 | 1339.7685 |
| ν45 | 1389.8254 |
| ν46 | 1401.4677 |
| ν47 | 1413.8530 |
| ν48 | 1418.1711 |
| ν49 | 1466.4269 |
| ν50 | 1476.3900 |
| ν51 | 1482.4072 |
| ν52 | 1484.4411 |
| ν53 | 1492.1589 |
| ν54 | 1496.4818 |
| ν55 | 1504.5979 |
| ν56 | 1508.3802 |
| ν57 | 1516.7724 |
| ν58 | 1635.6240 |
| ν59 | 2943.2791 |
| ν60 | 3023.6758 |
| ν61 | 3026.5297 |
| ν62 | 3030.5946 |
| ν63 | 3032.6761 |
| ν64 | 3035.0372 |
| ν65 | 3091.3134 |
| ν66 | 3093.0717 |
| ν67 | 3099.0520 |
| ν68 | 3101.4158 |
| ν69 | 3104.7551 |
| ν70 | 3106.0491 |
| ν71 | 3114.2693 |
| ν72 | 3124.7463 |
| ν73 | 3176.6805 |
| ν74 | 3734.4917 |
| ν75 | 3877.6233 |

**Table S61.** Vibrational frequencies in cm−1 for OH as calculated at the B3LYP/GTBas3 leνel.

| ν1 | 3694.2292 |
| --- | --- |

**Table S62.** Vibrational frequencies in cm−1 for H2O as calculated at the B3LYP/GTBas3 leνel.

| ν1 | 1670.4242 |
| --- | --- |
| ν2 | 3805.1898 |
| ν3 | 3909.8459 |

**Table S63.** Vibrational frequencies in cm−1 for TMO as calculated at the B3LYP/GTBas3 leνel.

| ν1 | 43.4368 |
| --- | --- |
| ν2 | 154.8939 |
| ν3 | 213.6853 |
| ν4 | 216.9149 |
| ν5 | 237.6416 |
| ν6 | 255.5497 |
| ν7 | 281.9529 |
| ν8 | 298.9012 |
| ν9 | 341.6026 |
| ν10 | 357.0833 |
| ν11 | 363.9164 |
| ν12 | 419.0744 |
| ν13 | 441.6630 |
| ν14 | 477.5702 |
| ν15 | 582.9264 |
| ν16 | 587.9598 |
| ν17 | 739.8202 |
| ν18 | 772.6963 |
| ν19 | 854.0587 |
| ν20 | 902.2667 |
| ν21 | 909.9621 |
| ν22 | 921.8044 |
| ν23 | 930.2939 |
| ν24 | 951.4559 |
| ν25 | 976.0676 |
| ν26 | 1002.3219 |
| ν27 | 1012.3577 |
| ν28 | 1017.1026 |
| ν29 | 1043.5389 |
| ν30 | 1092.3932 |
| ν31 | 1152.1077 |
| ν32 | 1168.4572 |
| ν33 | 1228.6646 |
| ν34 | 1234.9741 |
| ν35 | 1270.5188 |
| ν36 | 1279.1095 |
| ν37 | 1288.1917 |
| ν38 | 1337.6480 |
| ν39 | 1346.9435 |
| ν40 | 1395.4638 |
| ν41 | 1396.8784 |
| ν42 | 1412.9839 |
| ν43 | 1414.1517 |
| ν44 | 1474.2891 |
| ν45 | 1474.5360 |
| ν46 | 1481.1111 |
| ν47 | 1484.2551 |
| ν48 | 1491.7672 |
| ν49 | 1498.4810 |
| ν50 | 1498.6320 |
| ν51 | 1501.0856 |
| ν52 | 1503.0269 |
| ν53 | 1509.8379 |
| ν54 | 3030.3695 |
| ν55 | 3030.7192 |
| ν56 | 3035.5050 |
| ν57 | 3035.5977 |
| ν58 | 3047.5105 |
| ν59 | 3047.8215 |
| ν60 | 3092.3082 |
| ν61 | 3100.9253 |
| ν62 | 3101.3398 |
| ν63 | 3101.5160 |
| ν64 | 3106.1500 |
| ν65 | 3106.5529 |
| ν66 | 3112.7929 |
| ν67 | 3114.2802 |
| ν68 | 3114.3641 |
| ν69 | 3115.5435 |

**Table S64.** Vibrational frequencies in cm−1 for the primary TMO radical as calculated at the B3LYP/GTBas3 leνel.

| ν1 | 49.5268 |
| --- | --- |
| ν2 | 133.3586 |
| ν3 | 154.6740 |
| ν4 | 222.9660 |
| ν5 | 227.3410 |
| ν6 | 249.6441 |
| ν7 | 276.2949 |
| ν8 | 289.2153 |
| ν9 | 332.8091 |
| ν10 | 340.6974 |
| ν11 | 370.1842 |
| ν12 | 421.8499 |
| ν13 | 440.7918 |
| ν14 | 483.2466 |
| ν15 | 507.5851 |
| ν16 | 585.7734 |
| ν17 | 604.2457 |
| ν18 | 745.7997 |
| ν19 | 777.1579 |
| ν20 | 847.7889 |
| ν21 | 901.0450 |
| ν22 | 911.9580 |
| ν23 | 924.1220 |
| ν24 | 938.8985 |
| ν25 | 970.8194 |
| ν26 | 992.3085 |
| ν27 | 996.1744 |
| ν28 | 1012.7418 |
| ν29 | 1033.6639 |
| ν30 | 1088.7238 |
| ν31 | 1099.4639 |
| ν32 | 1157.5250 |
| ν33 | 1185.4782 |
| ν34 | 1230.0982 |
| ν35 | 1266.7298 |
| ν36 | 1272.5183 |
| ν37 | 1279.7339 |
| ν38 | 1328.7664 |
| ν39 | 1343.2417 |
| ν40 | 1392.5081 |
| ν41 | 1395.8519 |
| ν42 | 1413.0916 |
| ν43 | 1438.9601 |
| ν44 | 1474.9375 |
| ν45 | 1478.1662 |
| ν46 | 1482.3661 |
| ν47 | 1487.8739 |
| ν48 | 1492.2278 |
| ν49 | 1496.5483 |
| ν50 | 1498.7023 |
| ν51 | 1506.1027 |
| ν52 | 3030.0400 |
| ν53 | 3033.5934 |
| ν54 | 3035.2674 |
| ν55 | 3047.6459 |
| ν56 | 3051.5595 |
| ν57 | 3096.2528 |
| ν58 | 3101.1029 |
| ν59 | 3104.9215 |
| ν60 | 3106.5053 |
| ν61 | 3110.3667 |
| ν62 | 3113.7158 |
| ν63 | 3115.1312 |
| ν64 | 3118.3939 |
| ν65 | 3143.1642 |
| ν66 | 3256.6978 |

**Table S65.** Vibrational frequencies in cm−1 for the secondary TMO radical as calculated at the B3LYP/GTBas3 leνel.

| ν1 | 78.3097 |
| --- | --- |
| ν2 | 92.8466 |
| ν3 | 199.7946 |
| ν4 | 218.7384 |
| ν5 | 239.4570 |
| ν6 | 255.0623 |
| ν7 | 261.9452 |
| ν8 | 296.1475 |
| ν9 | 306.7964 |
| ν10 | 347.2250 |
| ν11 | 349.9497 |
| ν12 | 383.4579 |
| ν13 | 430.2723 |
| ν14 | 441.1429 |
| ν15 | 497.9975 |
| ν16 | 582.8146 |
| ν17 | 632.6834 |
| ν18 | 780.8186 |
| ν19 | 831.1077 |
| ν20 | 855.5230 |
| ν21 | 898.7394 |
| ν22 | 914.1085 |
| ν23 | 924.4493 |
| ν24 | 934.0121 |
| ν25 | 965.5272 |
| ν26 | 997.3957 |
| ν27 | 1009.7130 |
| ν28 | 1014.0203 |
| ν29 | 1019.1617 |
| ν30 | 1097.7290 |
| ν31 | 1160.4256 |
| ν32 | 1166.4421 |
| ν33 | 1177.8482 |
| ν34 | 1217.3657 |
| ν35 | 1262.7114 |
| ν36 | 1274.1081 |
| ν37 | 1316.9100 |
| ν38 | 1347.5941 |
| ν39 | 1384.4861 |
| ν40 | 1394.8063 |
| ν41 | 1407.2416 |
| ν42 | 1412.6971 |
| ν43 | 1467.2748 |
| ν44 | 1472.1358 |
| ν45 | 1477.4739 |
| ν46 | 1478.9711 |
| ν47 | 1484.5837 |
| ν48 | 1491.7310 |
| ν49 | 1498.3258 |
| ν50 | 1500.5550 |
| ν51 | 1506.8828 |
| ν52 | 2943.4515 |
| ν53 | 3031.3487 |
| ν54 | 3032.2576 |
| ν55 | 3036.8846 |
| ν56 | 3037.7872 |
| ν57 | 3041.0552 |
| ν58 | 3101.5703 |
| ν59 | 3102.6331 |
| ν60 | 3109.1314 |
| ν61 | 3110.2785 |
| ν62 | 3114.9527 |
| ν63 | 3117.2591 |
| ν64 | 3118.4843 |
| ν65 | 3124.4206 |
| ν66 | 3212.6370 |

**Table S66.** Vibrational frequencies in cm−1 for the TMO∙∙∙OH pre-reaction complex for as calculated at the B3LYP/GTBas3 leνel.

| ν1 | 33.8206 |
| --- | --- |
| ν2 | 43.0112 |
| ν3 | 69.7075 |
| ν4 | 155.6866 |
| ν5 | 166.4408 |
| ν6 | 218.8364 |
| ν7 | 234.1548 |
| ν8 | 246.4235 |
| ν9 | 268.0293 |
| ν10 | 290.2828 |
| ν11 | 299.8046 |
| ν12 | 341.7533 |
| ν13 | 363.5115 |
| ν14 | 368.8214 |
| ν15 | 418.2772 |
| ν16 | 446.4782 |
| ν17 | 457.4164 |
| ν18 | 480.5224 |
| ν19 | 582.0196 |
| ν20 | 587.6537 |
| ν21 | 699.2873 |
| ν22 | 743.8554 |
| ν23 | 780.7774 |
| ν24 | 853.0927 |
| ν25 | 896.9255 |
| ν26 | 914.7890 |
| ν27 | 927.2654 |
| ν28 | 934.4365 |
| ν29 | 953.6386 |
| ν30 | 977.9910 |
| ν31 | 1002.7971 |
| ν32 | 1012.7357 |
| ν33 | 1015.3366 |
| ν34 | 1046.9428 |
| ν35 | 1096.0132 |
| ν36 | 1150.6783 |
| ν37 | 1165.2896 |
| ν38 | 1234.0104 |
| ν39 | 1236.6319 |
| ν40 | 1268.5820 |
| ν41 | 1283.1030 |
| ν42 | 1291.5661 |
| ν43 | 1340.2277 |
| ν44 | 1348.9232 |
| ν45 | 1396.3510 |
| ν46 | 1399.8294 |
| ν47 | 1416.9050 |
| ν48 | 1418.4356 |
| ν49 | 1471.9078 |
| ν50 | 1475.5305 |
| ν51 | 1481.7948 |
| ν52 | 1487.2338 |
| ν53 | 1493.6899 |
| ν54 | 1499.2729 |
| ν55 | 1500.9056 |
| ν56 | 1501.9310 |
| ν57 | 1506.1427 |
| ν58 | 1513.7616 |
| ν59 | 3033.7931 |
| ν60 | 3034.2615 |
| ν61 | 3038.6066 |
| ν62 | 3038.7895 |
| ν63 | 3050.8314 |
| ν64 | 3052.8801 |
| ν65 | 3097.8732 |
| ν66 | 3105.3073 |
| ν67 | 3106.0575 |
| ν68 | 3106.8445 |
| ν69 | 3110.4807 |
| ν70 | 3112.4873 |
| ν71 | 3116.2059 |
| ν72 | 3117.0039 |
| ν73 | 3118.7059 |
| ν74 | 3122.6223 |
| ν75 | 3487.9301 |

**Table S67.** Vibrational frequencies in cm−1 for the TMO∙∙∙OH pre-reaction complex for as calculated at the B3LYP/GTBas3 leνel.

| ν1 | 27.8600 |
| --- | --- |
| ν2 | 32.0395 |
| ν3 | 83.0500 |
| ν4 | 93.5470 |
| ν5 | 142.8736 |
| ν6 | 154.3567 |
| ν7 | 213.4271 |
| ν8 | 239.4375 |
| ν9 | 250.0997 |
| ν10 | 268.7596 |
| ν11 | 286.7539 |
| ν12 | 303.4112 |
| ν13 | 341.2005 |
| ν14 | 355.7979 |
| ν15 | 362.6491 |
| ν16 | 395.5348 |
| ν17 | 421.0336 |
| ν18 | 443.6873 |
| ν19 | 478.3207 |
| ν20 | 583.7932 |
| ν21 | 588.2876 |
| ν22 | 738.9090 |
| ν23 | 772.5471 |
| ν24 | 853.0634 |
| ν25 | 901.7361 |
| ν26 | 911.5925 |
| ν27 | 923.8005 |
| ν28 | 930.6458 |
| ν29 | 953.0468 |
| ν30 | 975.7323 |
| ν31 | 1001.9358 |
| ν32 | 1011.5300 |
| ν33 | 1015.0341 |
| ν34 | 1040.2357 |
| ν35 | 1089.3945 |
| ν36 | 1150.3575 |
| ν37 | 1167.4667 |
| ν38 | 1228.6924 |
| ν39 | 1233.9313 |
| ν40 | 1265.6661 |
| ν41 | 1279.1603 |
| ν42 | 1288.9263 |
| ν43 | 1337.0099 |
| ν44 | 1346.8028 |
| ν45 | 1380.4331 |
| ν46 | 1395.6987 |
| ν47 | 1407.4532 |
| ν48 | 1413.0914 |
| ν49 | 1462.7582 |
| ν50 | 1474.0926 |
| ν51 | 1475.3120 |
| ν52 | 1481.5341 |
| ν53 | 1489.6943 |
| ν54 | 1497.7850 |
| ν55 | 1498.3915 |
| ν56 | 1501.7494 |
| ν57 | 1503.5354 |
| ν58 | 1508.4269 |
| ν59 | 2910.0671 |
| ν60 | 3031.1291 |
| ν61 | 3034.1488 |
| ν62 | 3036.1122 |
| ν63 | 3047.8895 |
| ν64 | 3049.9246 |
| ν65 | 3066.7489 |
| ν66 | 3095.4827 |
| ν67 | 3101.9720 |
| ν68 | 3103.7246 |
| ν69 | 3106.6994 |
| ν70 | 3108.4152 |
| ν71 | 3111.6204 |
| ν72 | 3114.5431 |
| ν73 | 3115.4668 |
| ν74 | 3115.8269 |
| ν75 | 3708.7191 |

**Table S68.** Vibrational frequencies in cm−1 for the TMO∙∙∙OH pre-reaction complex for as calculated at the B3LYP/GTBas3 leνel.

| ν1 | 33.7014 |
| --- | --- |
| ν2 | 42.9071 |
| ν3 | 69.6429 |
| ν4 | 155.7058 |
| ν5 | 166.2326 |
| ν6 | 218.7450 |
| ν7 | 234.1942 |
| ν8 | 246.3563 |
| ν9 | 268.0913 |
| ν10 | 290.2866 |
| ν11 | 299.7942 |
| ν12 | 341.7465 |
| ν13 | 363.4657 |
| ν14 | 368.8492 |
| ν15 | 418.2805 |
| ν16 | 446.4292 |
| ν17 | 456.9264 |
| ν18 | 480.3892 |
| ν19 | 581.9965 |
| ν20 | 587.6689 |
| ν21 | 698.5702 |
| ν22 | 743.8416 |
| ν23 | 780.7760 |
| ν24 | 853.0913 |
| ν25 | 896.9675 |
| ν26 | 914.7728 |
| ν27 | 927.2762 |
| ν28 | 934.4418 |
| ν29 | 953.6573 |
| ν30 | 977.9917 |
| ν31 | 1002.8247 |
| ν32 | 1012.7164 |
| ν33 | 1015.3312 |
| ν34 | 1046.9545 |
| ν35 | 1095.9966 |
| ν36 | 1150.6895 |
| ν37 | 1165.2951 |
| ν38 | 1234.0185 |
| ν39 | 1236.6411 |
| ν40 | 1268.5851 |
| ν41 | 1283.0987 |
| ν42 | 1291.5672 |
| ν43 | 1340.2280 |
| ν44 | 1348.9266 |
| ν45 | 1396.3773 |
| ν46 | 1399.8301 |
| ν47 | 1416.9014 |
| ν48 | 1418.4468 |
| ν49 | 1471.9198 |
| ν50 | 1475.5330 |
| ν51 | 1481.7901 |
| ν52 | 1487.2502 |
| ν53 | 1493.6834 |
| ν54 | 1499.2993 |
| ν55 | 1500.8817 |
| ν56 | 1501.9211 |
| ν57 | 1506.1550 |
| ν58 | 1513.7465 |
| ν59 | 3033.8036 |
| ν60 | 3034.2438 |
| ν61 | 3038.6267 |
| ν62 | 3038.7559 |
| ν63 | 3050.8802 |
| ν64 | 3052.8159 |
| ν65 | 3097.8713 |
| ν66 | 3105.3117 |
| ν67 | 3106.0392 |
| ν68 | 3106.8376 |
| ν69 | 3110.4761 |
| ν70 | 3112.4072 |
| ν71 | 3116.2308 |
| ν72 | 3117.0260 |
| ν73 | 3118.6722 |
| ν74 | 3122.6253 |
| ν75 | 3488.6969 |

**Table S69.** Vibrational frequencies in cm−1 for the TMO∙∙∙OH pre-reaction complex for as calculated at the B3LYP/GTBas3 leνel.

| ν1 | 30.8774 |
| --- | --- |
| ν2 | 48.0828 |
| ν3 | 65.9594 |
| ν4 | 101.7239 |
| ν5 | 146.9281 |
| ν6 | 162.5440 |
| ν7 | 214.6720 |
| ν8 | 220.8016 |
| ν9 | 243.2742 |
| ν10 | 262.8426 |
| ν11 | 284.2735 |
| ν12 | 299.2270 |
| ν13 | 342.6461 |
| ν14 | 358.9921 |
| ν15 | 362.5312 |
| ν16 | 404.7025 |
| ν17 | 419.6565 |
| ν18 | 445.8183 |
| ν19 | 480.0878 |
| ν20 | 585.3717 |
| ν21 | 589.7141 |
| ν22 | 742.2074 |
| ν23 | 773.1730 |
| ν24 | 852.5669 |
| ν25 | 903.4607 |
| ν26 | 913.0689 |
| ν27 | 924.6344 |
| ν28 | 932.1912 |
| ν29 | 954.2909 |
| ν30 | 975.9943 |
| ν31 | 1000.7710 |
| ν32 | 1010.7467 |
| ν33 | 1013.3779 |
| ν34 | 1042.0808 |
| ν35 | 1091.9932 |
| ν36 | 1152.4305 |
| ν37 | 1167.6358 |
| ν38 | 1228.6845 |
| ν39 | 1233.7813 |
| ν40 | 1269.2006 |
| ν41 | 1279.6265 |
| ν42 | 1288.6916 |
| ν43 | 1338.9888 |
| ν44 | 1346.3113 |
| ν45 | 1379.6608 |
| ν46 | 1396.0054 |
| ν47 | 1407.7954 |
| ν48 | 1413.5018 |
| ν49 | 1458.4170 |
| ν50 | 1472.8270 |
| ν51 | 1476.1791 |
| ν52 | 1482.6504 |
| ν53 | 1489.7239 |
| ν54 | 1494.6568 |
| ν55 | 1498.8420 |
| ν56 | 1499.6515 |
| ν57 | 1502.8765 |
| ν58 | 1510.8433 |
| ν59 | 2901.4052 |
| ν60 | 3031.2616 |
| ν61 | 3035.7202 |
| ν62 | 3036.0550 |
| ν63 | 3044.9968 |
| ν64 | 3049.2865 |
| ν65 | 3067.2471 |
| ν66 | 3095.6669 |
| ν67 | 3102.3438 |
| ν68 | 3107.4134 |
| ν69 | 3107.7799 |
| ν70 | 3110.4980 |
| ν71 | 3111.6012 |
| ν72 | 3113.7554 |
| ν73 | 3115.3050 |
| ν74 | 3116.5308 |
| ν75 | 3710.4645 |

**Table S70.** Vibrational frequencies in cm−1 for the TMO∙∙∙OH pre-reaction complex for as calculated at the B3LYP/GTBas3 leνel.

| ν1 | 46.3467 |
| --- | --- |
| ν2 | 59.4201 |
| ν3 | 65.5517 |
| ν4 | 93.5501 |
| ν5 | 118.1505 |
| ν6 | 163.2225 |
| ν7 | 214.4080 |
| ν8 | 220.2886 |
| ν9 | 244.3474 |
| ν10 | 274.8536 |
| ν11 | 285.7514 |
| ν12 | 303.6052 |
| ν13 | 345.3932 |
| ν14 | 360.0398 |
| ν15 | 366.1041 |
| ν16 | 421.3383 |
| ν17 | 441.4249 |
| ν18 | 477.5940 |
| ν19 | 502.6421 |
| ν20 | 582.9260 |
| ν21 | 591.0866 |
| ν22 | 736.2667 |
| ν23 | 775.1532 |
| ν24 | 854.8882 |
| ν25 | 896.1046 |
| ν26 | 908.4115 |
| ν27 | 920.0733 |
| ν28 | 932.9301 |
| ν29 | 955.3297 |
| ν30 | 975.4133 |
| ν31 | 1003.4249 |
| ν32 | 1012.8587 |
| ν33 | 1019.3282 |
| ν34 | 1041.2885 |
| ν35 | 1096.9136 |
| ν36 | 1151.5921 |
| ν37 | 1166.6296 |
| ν38 | 1222.3274 |
| ν39 | 1226.1509 |
| ν40 | 1264.0096 |
| ν41 | 1274.0901 |
| ν42 | 1281.7403 |
| ν43 | 1322.8842 |
| ν44 | 1335.6755 |
| ν45 | 1392.5452 |
| ν46 | 1398.3251 |
| ν47 | 1409.9516 |
| ν48 | 1414.7492 |
| ν49 | 1421.6534 |
| ν50 | 1475.6432 |
| ν51 | 1478.4114 |
| ν52 | 1482.4473 |
| ν53 | 1486.0408 |
| ν54 | 1492.1110 |
| ν55 | 1496.4606 |
| ν56 | 1501.2675 |
| ν57 | 1503.6058 |
| ν58 | 1513.5389 |
| ν59 | 2635.5737 |
| ν60 | 3029.5657 |
| ν61 | 3032.9279 |
| ν62 | 3034.6139 |
| ν63 | 3040.0077 |
| ν64 | 3041.4567 |
| ν65 | 3086.8885 |
| ν66 | 3089.5131 |
| ν67 | 3101.1336 |
| ν68 | 3104.8028 |
| ν69 | 3108.0279 |
| ν70 | 3109.3609 |
| ν71 | 3113.9353 |
| ν72 | 3116.0718 |
| ν73 | 3120.3283 |
| ν74 | 3129.0624 |
| ν75 | 3714.2021 |

**Table S71.** Vibrational frequencies in cm−1 for the TMO∙∙∙OH transition state as calculated at the B3LYP/GTBas3 leνel.

| ν1 | -950.0914 |
| --- | --- |
| ν2 | 58.1695 |
| ν3 | 83.6117 |
| ν4 | 117.7265 |
| ν5 | 158.0673 |
| ν6 | 222.2231 |
| ν7 | 231.1418 |
| ν8 | 252.3186 |
| ν9 | 275.6361 |
| ν10 | 281.3582 |
| ν11 | 326.5645 |
| ν12 | 341.3889 |
| ν13 | 363.7929 |
| ν14 | 394.9038 |
| ν15 | 403.7980 |
| ν16 | 428.5923 |
| ν17 | 444.9177 |
| ν18 | 491.4579 |
| ν19 | 579.1620 |
| ν20 | 591.6261 |
| ν21 | 735.1793 |
| ν22 | 752.5465 |
| ν23 | 771.8845 |
| ν24 | 856.0161 |
| ν25 | 899.9588 |
| ν26 | 915.4989 |
| ν27 | 925.8127 |
| ν28 | 931.1706 |
| ν29 | 935.6251 |
| ν30 | 957.9430 |
| ν31 | 974.1808 |
| ν32 | 1001.5506 |
| ν33 | 1008.2230 |
| ν34 | 1016.2760 |
| ν35 | 1051.3598 |
| ν36 | 1095.3274 |
| ν37 | 1152.0468 |
| ν38 | 1169.1185 |
| ν39 | 1212.9330 |
| ν40 | 1229.4823 |
| ν41 | 1265.9405 |
| ν42 | 1268.2875 |
| ν43 | 1283.9190 |
| ν44 | 1291.2508 |
| ν45 | 1338.8084 |
| ν46 | 1354.6491 |
| ν47 | 1395.6780 |
| ν48 | 1398.9093 |
| ν49 | 1415.4010 |
| ν50 | 1447.8846 |
| ν51 | 1470.6302 |
| ν52 | 1476.8371 |
| ν53 | 1482.6393 |
| ν54 | 1486.8024 |
| ν55 | 1490.9690 |
| ν56 | 1497.1447 |
| ν57 | 1499.7470 |
| ν58 | 1505.7380 |
| ν59 | 1514.0348 |
| ν60 | 3031.2068 |
| ν61 | 3036.3049 |
| ν62 | 3036.8631 |
| ν63 | 3052.2757 |
| ν64 | 3060.8261 |
| ν65 | 3071.1214 |
| ν66 | 3096.7030 |
| ν67 | 3101.4361 |
| ν68 | 3107.1935 |
| ν69 | 3109.1768 |
| ν70 | 3112.7414 |
| ν71 | 3115.6503 |
| ν72 | 3118.6572 |
| ν73 | 3120.1476 |
| ν74 | 3145.1462 |
| ν75 | 3732.2638 |

**Table S72.** Vibrational frequencies in cm−1 for the TMO∙∙∙OH transition state as calculated at the B3LYP/GTBas3 leνel.

| ν1 | -498.5668 |
| --- | --- |
| ν2 | 42.2772 |
| ν3 | 53.2709 |
| ν4 | 105.4993 |
| ν5 | 147.2932 |
| ν6 | 159.0465 |
| ν7 | 212.3934 |
| ν8 | 235.0950 |
| ν9 | 265.8450 |
| ν10 | 274.1558 |
| ν11 | 294.5379 |
| ν12 | 335.3859 |
| ν13 | 357.2887 |
| ν14 | 362.0056 |
| ν15 | 385.6026 |
| ν16 | 414.6549 |
| ν17 | 447.1402 |
| ν18 | 475.7648 |
| ν19 | 584.4811 |
| ν20 | 593.2512 |
| ν21 | 739.6841 |
| ν22 | 771.5473 |
| ν23 | 791.6999 |
| ν24 | 860.5770 |
| ν25 | 898.7294 |
| ν26 | 913.9186 |
| ν27 | 921.5960 |
| ν28 | 937.8197 |
| ν29 | 954.2465 |
| ν30 | 974.5884 |
| ν31 | 991.6944 |
| ν32 | 1010.5504 |
| ν33 | 1014.8242 |
| ν34 | 1028.6944 |
| ν35 | 1082.2478 |
| ν36 | 1122.0428 |
| ν37 | 1160.1963 |
| ν38 | 1204.6670 |
| ν39 | 1227.5792 |
| ν40 | 1235.0714 |
| ν41 | 1265.6941 |
| ν42 | 1280.3340 |
| ν43 | 1288.9355 |
| ν44 | 1299.5106 |
| ν45 | 1338.1537 |
| ν46 | 1348.0477 |
| ν47 | 1396.2090 |
| ν48 | 1403.6523 |
| ν49 | 1413.4372 |
| ν50 | 1429.2893 |
| ν51 | 1462.1132 |
| ν52 | 1474.4322 |
| ν53 | 1481.3024 |
| ν54 | 1489.9574 |
| ν55 | 1494.3032 |
| ν56 | 1497.9506 |
| ν57 | 1501.5209 |
| ν58 | 1503.0337 |
| ν59 | 1508.6955 |
| ν60 | 3033.2435 |
| ν61 | 3036.6084 |
| ν62 | 3037.9663 |
| ν63 | 3048.1027 |
| ν64 | 3056.0571 |
| ν65 | 3068.9429 |
| ν66 | 3098.2405 |
| ν67 | 3104.3007 |
| ν68 | 3108.7490 |
| ν69 | 3109.3416 |
| ν70 | 3113.2073 |
| ν71 | 3116.6864 |
| ν72 | 3117.8010 |
| ν73 | 3121.1349 |
| ν74 | 3138.5362 |
| ν75 | 3742.1577 |

**Table S73.** Vibrational frequencies in cm−1 for the TMO∙∙∙OH transition state as calculated at the B3LYP/GTBas3 leνel.

| ν1 | -1090.3031 |
| --- | --- |
| ν2 | 41.3936 |
| ν3 | 79.0405 |
| ν4 | 111.8083 |
| ν5 | 166.0591 |
| ν6 | 215.7303 |
| ν7 | 237.0575 |
| ν8 | 259.1609 |
| ν9 | 270.0878 |
| ν10 | 298.9410 |
| ν11 | 325.7716 |
| ν12 | 348.7115 |
| ν13 | 361.3916 |
| ν14 | 389.7199 |
| ν15 | 417.0542 |
| ν16 | 439.4582 |
| ν17 | 448.9987 |
| ν18 | 479.0000 |
| ν19 | 582.3018 |
| ν20 | 587.0586 |
| ν21 | 696.7464 |
| ν22 | 753.8246 |
| ν23 | 773.0547 |
| ν24 | 865.1710 |
| ν25 | 899.4826 |
| ν26 | 912.3777 |
| ν27 | 926.0813 |
| ν28 | 933.0575 |
| ν29 | 943.0169 |
| ν30 | 953.3323 |
| ν31 | 978.4737 |
| ν32 | 1007.2013 |
| ν33 | 1013.6589 |
| ν34 | 1027.6545 |
| ν35 | 1064.3024 |
| ν36 | 1101.4216 |
| ν37 | 1149.7559 |
| ν38 | 1165.5433 |
| ν39 | 1209.4374 |
| ν40 | 1234.7709 |
| ν41 | 1249.2810 |
| ν42 | 1266.2901 |
| ν43 | 1284.6477 |
| ν44 | 1287.2858 |
| ν45 | 1333.4783 |
| ν46 | 1345.5065 |
| ν47 | 1398.1721 |
| ν48 | 1404.7482 |
| ν49 | 1415.5727 |
| ν50 | 1446.2110 |
| ν51 | 1475.0015 |
| ν52 | 1481.0375 |
| ν53 | 1484.7354 |
| ν54 | 1491.6090 |
| ν55 | 1496.9111 |
| ν56 | 1498.4958 |
| ν57 | 1500.9444 |
| ν58 | 1504.3907 |
| ν59 | 1508.0368 |
| ν60 | 3033.4200 |
| ν61 | 3037.5766 |
| ν62 | 3038.2766 |
| ν63 | 3051.4868 |
| ν64 | 3052.5324 |
| ν65 | 3072.0357 |
| ν66 | 3098.1351 |
| ν67 | 3104.7419 |
| ν68 | 3107.7671 |
| ν69 | 3108.4681 |
| ν70 | 3110.3065 |
| ν71 | 3116.0733 |
| ν72 | 3117.2290 |
| ν73 | 3131.8279 |
| ν74 | 3149.8140 |
| ν75 | 3702.2976 |

**Table S74.** Vibrational frequencies in cm−1 for the TMO∙∙∙OH transition state as calculated at the B3LYP/GTBas3 leνel.

| ν1 | -376.4760 |
| --- | --- |
| ν2 | 30.0746 |
| ν3 | 62.4855 |
| ν4 | 81.4125 |
| ν5 | 112.2641 |
| ν6 | 172.0529 |
| ν7 | 212.5583 |
| ν8 | 217.1232 |
| ν9 | 238.8051 |
| ν10 | 258.4003 |
| ν11 | 276.7310 |
| ν12 | 298.6576 |
| ν13 | 331.3540 |
| ν14 | 361.7430 |
| ν15 | 364.9251 |
| ν16 | 409.3623 |
| ν17 | 446.2037 |
| ν18 | 470.3243 |
| ν19 | 575.3404 |
| ν20 | 580.0234 |
| ν21 | 693.1961 |
| ν22 | 761.0094 |
| ν23 | 791.8190 |
| ν24 | 852.9716 |
| ν25 | 905.6874 |
| ν26 | 917.7525 |
| ν27 | 925.9059 |
| ν28 | 931.1490 |
| ν29 | 951.7864 |
| ν30 | 973.8216 |
| ν31 | 1001.6389 |
| ν32 | 1014.5254 |
| ν33 | 1020.1707 |
| ν34 | 1047.6714 |
| ν35 | 1069.9347 |
| ν36 | 1127.2772 |
| ν37 | 1164.0601 |
| ν38 | 1204.8142 |
| ν39 | 1226.1580 |
| ν40 | 1234.6813 |
| ν41 | 1262.2572 |
| ν42 | 1277.6165 |
| ν43 | 1313.8718 |
| ν44 | 1319.2360 |
| ν45 | 1338.7572 |
| ν46 | 1395.3482 |
| ν47 | 1396.8401 |
| ν48 | 1413.0013 |
| ν49 | 1414.9889 |
| ν50 | 1471.7250 |
| ν51 | 1474.0882 |
| ν52 | 1477.7108 |
| ν53 | 1482.1023 |
| ν54 | 1482.7261 |
| ν55 | 1493.0076 |
| ν56 | 1495.9215 |
| ν57 | 1501.3360 |
| ν58 | 1503.0193 |
| ν59 | 1507.4695 |
| ν60 | 3032.1154 |
| ν61 | 3034.5279 |
| ν62 | 3036.7590 |
| ν63 | 3038.9391 |
| ν64 | 3044.7346 |
| ν65 | 3067.4780 |
| ν66 | 3102.9387 |
| ν67 | 3105.1547 |
| ν68 | 3107.5142 |
| ν69 | 3108.4859 |
| ν70 | 3111.5626 |
| ν71 | 3115.3723 |
| ν72 | 3115.7990 |
| ν73 | 3116.9845 |
| ν74 | 3125.8243 |
| ν75 | 3739.6585 |

**Table S75.** Vibrational frequencies in cm−1 for the TMO∙∙∙OH transition state as calculated at the B3LYP/GTBas3 leνel.

| ν1 | -121.5218 |
| --- | --- |
| ν2 | 48.8922 |
| ν3 | 86.1563 |
| ν4 | 100.5465 |
| ν5 | 117.6830 |
| ν6 | 167.2044 |
| ν7 | 214.0119 |
| ν8 | 221.0159 |
| ν9 | 245.3942 |
| ν10 | 276.1380 |
| ν11 | 287.3261 |
| ν12 | 303.7266 |
| ν13 | 346.6746 |
| ν14 | 360.8951 |
| ν15 | 365.6473 |
| ν16 | 425.8057 |
| ν17 | 441.9712 |
| ν18 | 481.8051 |
| ν19 | 581.9803 |
| ν20 | 589.7267 |
| ν21 | 652.1156 |
| ν22 | 738.7060 |
| ν23 | 780.0048 |
| ν24 | 855.0982 |
| ν25 | 894.3210 |
| ν26 | 909.0898 |
| ν27 | 918.5493 |
| ν28 | 933.1203 |
| ν29 | 956.7989 |
| ν30 | 975.7509 |
| ν31 | 1003.1345 |
| ν32 | 1014.0849 |
| ν33 | 1019.3794 |
| ν34 | 1041.7844 |
| ν35 | 1114.0668 |
| ν36 | 1151.5790 |
| ν37 | 1166.1570 |
| ν38 | 1214.5378 |
| ν39 | 1224.9226 |
| ν40 | 1264.1294 |
| ν41 | 1277.0117 |
| ν42 | 1280.4615 |
| ν43 | 1321.8377 |
| ν44 | 1333.1019 |
| ν45 | 1349.9368 |
| ν46 | 1391.0077 |
| ν47 | 1399.4466 |
| ν48 | 1412.7647 |
| ν49 | 1417.2216 |
| ν50 | 1475.4778 |
| ν51 | 1476.6832 |
| ν52 | 1481.5986 |
| ν53 | 1484.4035 |
| ν54 | 1490.1213 |
| ν55 | 1495.1859 |
| ν56 | 1501.7743 |
| ν57 | 1503.3465 |
| ν58 | 1514.3874 |
| ν59 | 1970.0735 |
| ν60 | 3029.8572 |
| ν61 | 3030.7884 |
| ν62 | 3033.9215 |
| ν63 | 3037.7811 |
| ν64 | 3042.2036 |
| ν65 | 3087.0585 |
| ν66 | 3093.2121 |
| ν67 | 3101.5387 |
| ν68 | 3106.7025 |
| ν69 | 3108.7744 |
| ν70 | 3110.5951 |
| ν71 | 3114.2872 |
| ν72 | 3116.7958 |
| ν73 | 3123.7673 |
| ν74 | 3135.0306 |
| ν75 | 3728.5264 |

**Table S76.** Vibrational frequencies in cm−1 for the TMO∙∙∙OH post-reaction complex for as calculated at the B3LYP/GTBas3 leνel.

| ν1 | 35.6840 |
| --- | --- |
| ν2 | 66.4730 |
| ν3 | 90.9634 |
| ν4 | 110.2245 |
| ν5 | 157.1498 |
| ν6 | 162.0677 |
| ν7 | 203.9079 |
| ν8 | 220.4665 |
| ν9 | 244.2280 |
| ν10 | 252.9404 |
| ν11 | 277.6394 |
| ν12 | 288.8888 |
| ν13 | 305.4354 |
| ν14 | 341.6124 |
| ν15 | 348.6405 |
| ν16 | 362.8833 |
| ν17 | 417.0666 |
| ν18 | 430.5803 |
| ν19 | 441.6025 |
| ν20 | 477.9095 |
| ν21 | 581.7402 |
| ν22 | 590.1463 |
| ν23 | 633.9371 |
| ν24 | 740.7200 |
| ν25 | 768.3334 |
| ν26 | 842.3099 |
| ν27 | 905.0818 |
| ν28 | 913.8771 |
| ν29 | 931.5849 |
| ν30 | 936.7573 |
| ν31 | 963.1486 |
| ν32 | 991.6950 |
| ν33 | 998.8941 |
| ν34 | 1012.9781 |
| ν35 | 1032.0506 |
| ν36 | 1070.7924 |
| ν37 | 1145.3691 |
| ν38 | 1168.2284 |
| ν39 | 1179.7077 |
| ν40 | 1227.3255 |
| ν41 | 1260.7213 |
| ν42 | 1267.4817 |
| ν43 | 1281.3276 |
| ν44 | 1337.1904 |
| ν45 | 1355.8667 |
| ν46 | 1390.4495 |
| ν47 | 1399.5640 |
| ν48 | 1417.0232 |
| ν49 | 1436.7685 |
| ν50 | 1476.3662 |
| ν51 | 1480.7379 |
| ν52 | 1486.3534 |
| ν53 | 1488.5185 |
| ν54 | 1496.7616 |
| ν55 | 1501.8631 |
| ν56 | 1506.4575 |
| ν57 | 1515.7921 |
| ν58 | 1665.1776 |
| ν59 | 3030.7100 |
| ν60 | 3032.5983 |
| ν61 | 3036.2067 |
| ν62 | 3047.0843 |
| ν63 | 3067.3149 |
| ν64 | 3097.1315 |
| ν65 | 3101.7741 |
| ν66 | 3105.1422 |
| ν67 | 3109.5632 |
| ν68 | 3113.3007 |
| ν69 | 3116.4614 |
| ν70 | 3119.9460 |
| ν71 | 3122.2271 |
| ν72 | 3135.7426 |
| ν73 | 3247.9163 |
| ν74 | 3688.7767 |
| ν75 | 3864.8497 |

**Table S77.** Vibrational frequencies in cm−1 for the TMO∙∙∙OH post-reaction complex for as calculated at the B3LYP/GTBas3 leνel.

| ν1 | 35.4250 |
| --- | --- |
| ν2 | 42.2209 |
| ν3 | 88.3627 |
| ν4 | 110.5667 |
| ν5 | 155.9788 |
| ν6 | 161.9923 |
| ν7 | 199.4142 |
| ν8 | 211.1662 |
| ν9 | 239.8921 |
| ν10 | 264.5736 |
| ν11 | 273.6758 |
| ν12 | 281.3601 |
| ν13 | 306.2143 |
| ν14 | 339.3041 |
| ν15 | 358.2295 |
| ν16 | 370.4344 |
| ν17 | 411.5548 |
| ν18 | 417.9804 |
| ν19 | 440.6970 |
| ν20 | 474.6673 |
| ν21 | 582.4701 |
| ν22 | 598.7018 |
| ν23 | 670.6091 |
| ν24 | 745.9346 |
| ν25 | 769.0152 |
| ν26 | 852.2680 |
| ν27 | 899.9082 |
| ν28 | 914.9306 |
| ν29 | 917.7359 |
| ν30 | 942.2540 |
| ν31 | 962.7128 |
| ν32 | 970.8845 |
| ν33 | 992.9528 |
| ν34 | 1009.5423 |
| ν35 | 1028.0543 |
| ν36 | 1082.9828 |
| ν37 | 1119.3076 |
| ν38 | 1157.5796 |
| ν39 | 1224.7123 |
| ν40 | 1236.4145 |
| ν41 | 1254.8080 |
| ν42 | 1283.7045 |
| ν43 | 1288.5731 |
| ν44 | 1335.8401 |
| ν45 | 1348.7008 |
| ν46 | 1396.1115 |
| ν47 | 1403.9347 |
| ν48 | 1413.3535 |
| ν49 | 1457.9999 |
| ν50 | 1474.1904 |
| ν51 | 1481.2676 |
| ν52 | 1490.4258 |
| ν53 | 1492.0051 |
| ν54 | 1497.9435 |
| ν55 | 1500.6314 |
| ν56 | 1503.1487 |
| ν57 | 1509.0705 |
| ν58 | 1667.2135 |
| ν59 | 3032.8294 |
| ν60 | 3037.3088 |
| ν61 | 3037.7430 |
| ν62 | 3048.4133 |
| ν63 | 3054.5638 |
| ν64 | 3098.2705 |
| ν65 | 3103.6775 |
| ν66 | 3108.7568 |
| ν67 | 3112.7252 |
| ν68 | 3115.0616 |
| ν69 | 3117.4664 |
| ν70 | 3118.8759 |
| ν71 | 3121.1155 |
| ν72 | 3127.5843 |
| ν73 | 3232.5839 |
| ν74 | 3700.5261 |
| ν75 | 3866.6654 |

**Table S78.** Vibrational frequencies in cm−1 for the TMO∙∙∙OH post-reaction complex for as calculated at the B3LYP/GTBas3 leνel.

| ν1 | 31.0221 |
| --- | --- |
| ν2 | 45.7292 |
| ν3 | 79.7121 |
| ν4 | 99.1164 |
| ν5 | 148.4734 |
| ν6 | 168.1085 |
| ν7 | 199.1405 |
| ν8 | 220.2662 |
| ν9 | 246.3659 |
| ν10 | 272.7846 |
| ν11 | 291.3113 |
| ν12 | 300.8165 |
| ν13 | 309.3890 |
| ν14 | 338.3024 |
| ν15 | 362.4196 |
| ν16 | 364.0845 |
| ν17 | 415.7058 |
| ν18 | 434.2902 |
| ν19 | 476.4664 |
| ν20 | 515.2622 |
| ν21 | 582.5440 |
| ν22 | 596.1641 |
| ν23 | 632.3701 |
| ν24 | 746.7361 |
| ν25 | 773.5319 |
| ν26 | 856.6343 |
| ν27 | 891.6360 |
| ν28 | 915.1936 |
| ν29 | 924.8681 |
| ν30 | 936.2720 |
| ν31 | 961.3132 |
| ν32 | 978.9334 |
| ν33 | 992.5515 |
| ν34 | 1010.3630 |
| ν35 | 1031.7533 |
| ν36 | 1086.3189 |
| ν37 | 1134.4932 |
| ν38 | 1151.2143 |
| ν39 | 1204.9084 |
| ν40 | 1239.7223 |
| ν41 | 1255.4837 |
| ν42 | 1267.7698 |
| ν43 | 1286.6566 |
| ν44 | 1328.8959 |
| ν45 | 1345.2759 |
| ν46 | 1398.7456 |
| ν47 | 1407.6046 |
| ν48 | 1416.1877 |
| ν49 | 1452.1785 |
| ν50 | 1475.0231 |
| ν51 | 1481.0085 |
| ν52 | 1487.2115 |
| ν53 | 1494.4849 |
| ν54 | 1498.0932 |
| ν55 | 1499.6742 |
| ν56 | 1505.7708 |
| ν57 | 1511.1613 |
| ν58 | 1693.3549 |
| ν59 | 3033.5782 |
| ν60 | 3035.5942 |
| ν61 | 3038.3929 |
| ν62 | 3052.8067 |
| ν63 | 3055.8104 |
| ν64 | 3098.1475 |
| ν65 | 3104.9134 |
| ν66 | 3108.2983 |
| ν67 | 3108.8667 |
| ν68 | 3112.0033 |
| ν69 | 3116.5695 |
| ν70 | 3118.6133 |
| ν71 | 3129.2232 |
| ν72 | 3151.6953 |
| ν73 | 3264.5546 |
| ν74 | 3695.7513 |
| ν75 | 3867.3302 |

**Table S79.** Vibrational frequencies in cm−1 for the TMO∙∙∙OH post-reaction complex for as calculated at the B3LYP/GTBas3 leνel.

| ν1 | 20.4492 |
| --- | --- |
| ν2 | 56.9825 |
| ν3 | 79.6455 |
| ν4 | 84.9480 |
| ν5 | 91.2826 |
| ν6 | 130.8800 |
| ν7 | 169.9625 |
| ν8 | 210.3174 |
| ν9 | 221.5407 |
| ν10 | 248.8121 |
| ν11 | 257.6999 |
| ν12 | 276.6466 |
| ν13 | 308.8689 |
| ν14 | 315.2878 |
| ν15 | 342.3474 |
| ν16 | 348.7568 |
| ν17 | 360.6053 |
| ν18 | 407.0414 |
| ν19 | 444.0113 |
| ν20 | 461.3979 |
| ν21 | 505.9778 |
| ν22 | 583.7509 |
| ν23 | 626.0082 |
| ν24 | 780.1537 |
| ν25 | 824.4694 |
| ν26 | 856.4140 |
| ν27 | 895.2258 |
| ν28 | 919.0656 |
| ν29 | 925.6023 |
| ν30 | 933.4001 |
| ν31 | 965.0472 |
| ν32 | 1000.6530 |
| ν33 | 1006.8190 |
| ν34 | 1017.0931 |
| ν35 | 1023.9934 |
| ν36 | 1105.4806 |
| ν37 | 1157.8318 |
| ν38 | 1166.7928 |
| ν39 | 1180.8192 |
| ν40 | 1215.5877 |
| ν41 | 1263.9123 |
| ν42 | 1274.2063 |
| ν43 | 1312.8231 |
| ν44 | 1341.1116 |
| ν45 | 1386.0137 |
| ν46 | 1395.7103 |
| ν47 | 1408.7334 |
| ν48 | 1413.2039 |
| ν49 | 1466.7471 |
| ν50 | 1474.1059 |
| ν51 | 1478.5024 |
| ν52 | 1479.4557 |
| ν53 | 1485.0792 |
| ν54 | 1492.5519 |
| ν55 | 1499.1362 |
| ν56 | 1502.0874 |
| ν57 | 1507.8939 |
| ν58 | 1669.2556 |
| ν59 | 2956.7979 |
| ν60 | 3032.2980 |
| ν61 | 3033.4050 |
| ν62 | 3038.0877 |
| ν63 | 3039.5085 |
| ν64 | 3051.0365 |
| ν65 | 3102.5178 |
| ν66 | 3107.0857 |
| ν67 | 3110.2021 |
| ν68 | 3110.9316 |
| ν69 | 3115.3107 |
| ν70 | 3117.9239 |
| ν71 | 3123.6487 |
| ν72 | 3124.5190 |
| ν73 | 3207.3364 |
| ν74 | 3773.5894 |
| ν75 | 3884.3381 |

**Table S80.** Vibrational frequencies in cm−1 for the TMO∙∙∙OH post-reaction complex for as calculated at the B3LYP/GTBas3 leνel.

| ν1 | 56.5919 |
| --- | --- |
| ν2 | 63.1110 |
| ν3 | 89.9854 |
| ν4 | 100.7489 |
| ν5 | 124.3796 |
| ν6 | 150.3263 |
| ν7 | 211.4577 |
| ν8 | 221.5055 |
| ν9 | 239.3553 |
| ν10 | 251.6500 |
| ν11 | 281.4908 |
| ν12 | 284.4758 |
| ν13 | 308.7578 |
| ν14 | 328.7748 |
| ν15 | 355.5854 |
| ν16 | 361.3601 |
| ν17 | 389.1552 |
| ν18 | 419.4525 |
| ν19 | 442.5641 |
| ν20 | 467.8621 |
| ν21 | 528.7781 |
| ν22 | 583.1809 |
| ν23 | 643.3604 |
| ν24 | 780.7385 |
| ν25 | 834.4211 |
| ν26 | 855.7734 |
| ν27 | 897.2943 |
| ν28 | 917.6472 |
| ν29 | 924.5207 |
| ν30 | 940.2548 |
| ν31 | 970.5279 |
| ν32 | 999.6415 |
| ν33 | 1010.1891 |
| ν34 | 1015.9169 |
| ν35 | 1020.6879 |
| ν36 | 1097.7441 |
| ν37 | 1161.6199 |
| ν38 | 1167.5204 |
| ν39 | 1177.8679 |
| ν40 | 1217.9949 |
| ν41 | 1263.1769 |
| ν42 | 1272.5011 |
| ν43 | 1316.1788 |
| ν44 | 1340.2540 |
| ν45 | 1387.2282 |
| ν46 | 1399.5234 |
| ν47 | 1411.2095 |
| ν48 | 1416.9131 |
| ν49 | 1462.8565 |
| ν50 | 1474.2536 |
| ν51 | 1480.0606 |
| ν52 | 1481.0604 |
| ν53 | 1488.5693 |
| ν54 | 1494.2000 |
| ν55 | 1502.1887 |
| ν56 | 1505.6249 |
| ν57 | 1515.3277 |
| ν58 | 1664.3771 |
| ν59 | 2952.1794 |
| ν60 | 3029.3446 |
| ν61 | 3033.5864 |
| ν62 | 3037.0841 |
| ν63 | 3039.3901 |
| ν64 | 3043.2008 |
| ν65 | 3100.6537 |
| ν66 | 3104.5142 |
| ν67 | 3110.0516 |
| ν68 | 3112.8772 |
| ν69 | 3115.0018 |
| ν70 | 3116.5139 |
| ν71 | 3121.2470 |
| ν72 | 3136.0535 |
| ν73 | 3185.0044 |
| ν74 | 3717.8062 |
| ν75 | 3870.7735 |

**Table S81.** Rotational constants in GHz for OH as calculated at the B3LYP/CBSB7 leνel.

| A | 0.00000 |
| --- | --- |
| B | 560.83493 |
| C | 560.83493 |

**Table S82.** Rotational constants in GHz for H2O as calculated at the B3LYP/CBSB7 leνel.

| A | 801.35373 |
| --- | --- |
| B | 437.50697 |
| C | 283.00021 |

**Table S83.** Rotational constants in GHz for TMO as calculated at the B3LYP/CBSB7 leνel.

| A | 2.50242 |
| --- | --- |
| B | 1.27210 |
| C | 1.20912 |

**Table S84.** Rotational constants in GHz for the primary TMO radical as calculated at the B3LYP/CBSB7 leνel.

| A | 2.55061 |
| --- | --- |
| B | 1.29322 |
| C | 1.23844 |

**Table S85.** Rotational constants in GHz for the secondary TMO radical as calculated at the B3LYP/CBSB7 leνel.

| A | 2.56272 |
| --- | --- |
| B | 1.28243 |
| C | 1.21280 |

**Table S86.** Rotational constants in GHz for the TMO∙∙∙OH pre-reaction complex for as calculated at the B3LYP/CBSB7 leνel.

| A | 1.37185 |
| --- | --- |
| B | 1.14634 |
| C | 0.85749 |

**Table S87.** Rotational constants in GHz for the TMO∙∙∙OH pre-reaction complex for as calculated at the B3LYP/CBSB7 leνel.

| A | 2.46334 |
| --- | --- |
| B | 0.67218 |
| C | 0.65497 |

**Table S88.** Rotational constants in GHz for the TMO∙∙∙OH pre-reaction complex for as calculated at the B3LYP/CBSB7 leνel.

| A | 1.37166 |
| --- | --- |
| B | 1.14657 |
| C | 0.85753 |

**Table S89.** Rotational constants in GHz for the TMO∙∙∙OH pre-reaction complex for as calculated at the B3LYP/CBSB7 leνel.

| A | 1.99630 |
| --- | --- |
| B | 0.76289 |
| C | 0.71083 |

**Table S90.** Rotational constants in GHz for the TMO∙∙∙OH pre-reaction complex for as calculated at the B3LYP/CBSB7 leνel.

| A | 1.32933 |
| --- | --- |
| B | 1.18059 |
| C | 0.82105 |

**Table S91.** Rotational constants in GHz for the TMO∙∙∙OH transition state as calculated at the B3LYP/CBSB7 leνel.

| A | 1.52077 |
| --- | --- |
| B | 1.17077 |
| C | 0.87506 |

**Table S92.** Rotational constants in GHz for the TMO∙∙∙OH transition state as calculated at the B3LYP/CBSB7 leνel.

| A | 2.36569 |
| --- | --- |
| B | 0.73868 |
| C | 0.71167 |

**Table S93.** Rotational constants in GHz for the TMO∙∙∙OH transition state as calculated at the B3LYP/CBSB7 leνel.

| A | 1.69833 |
| --- | --- |
| B | 0.98100 |
| C | 0.85393 |

**Table S94.** Rotational constants in GHz for the TMO∙∙∙OH transition state as calculated at the B3LYP/CBSB7 leνel.

| A | 1.69582 |
| --- | --- |
| B | 0.92165 |
| C | 0.80554 |

**Table S95.** Rotational constants in GHz for the TMO∙∙∙OH transition state as calculated at the B3LYP/CBSB7 leνel.

| A | 1.38381 |
| --- | --- |
| B | 1.18704 |
| C | 0.84724 |

**Table S96.** Rotational constants in GHz for the TMO∙∙∙OH post-reaction complex for as calculated at the B3LYP/CBSB7 leνel.

| A | 1.36190 |
| --- | --- |
| B | 1.08435 |
| C | 0.77333 |

**Table S97.** Rotational constants in GHz for the TMO∙∙∙OH post-reaction complex for as calculated at the B3LYP/CBSB7 leνel.

| A | 2.30330 |
| --- | --- |
| B | 0.70513 |
| C | 0.69140 |

**Table S98.** Rotational constants in GHz for the TMO∙∙∙OH post-reaction complex for as calculated at the B3LYP/CBSB7 leνel.

| A | 1.46650 |
| --- | --- |
| B | 1.06564 |
| C | 0.84103 |

**Table S99.** Rotational constants in GHz for the TMO∙∙∙OH post-reaction complex for as calculated at the B3LYP/CBSB7 leνel.

| A | 1.76707 |
| --- | --- |
| B | 0.77933 |
| C | 0.68961 |

**Table S100.** Rotational constants in GHz for the TMO∙∙∙OH post-reaction complex for as calculated at the B3LYP/CBSB7 leνel.

| A | 1.30002 |
| --- | --- |
| B | 1.13595 |
| C | 0.78493 |

**Table S101.** Rotational constants in GHz for OH as calculated at the B3LYP/GTBas3 leνel.

| A | 0.00000 |
| --- | --- |
| B | 559.43578 |
| C | 559.43578 |

**Table S102.** Rotational constants in GHz for H2O as calculated at the B3LYP/GTBas3 leνel.

| A | 801.35373 |
| --- | --- |
| B | 437.50697 |
| C | 283.00021 |

**Table S103.** Rotational constants in GHz for TMO as calculated at the B3LYP/GTBas3 leνel.

| A | 2.50181 |
| --- | --- |
| B | 1.27423 |
| C | 1.21094 |

**Table S104.** Rotational constants in GHz for the primary TMO radical as calculated at the B3LYP/GTBas3 leνel.

| A | 2.55010 |
| --- | --- |
| B | 1.29695 |
| C | 1.24142 |

**Table S105.** Rotational constants in GHz for the secondary TMO radical as calculated at the B3LYP/GTBas3 leνel.

| A | 2.56260 |
| --- | --- |
| B | 1.28444 |
| C | 1.21478 |

**Table S106.** Rotational constants in GHz for the TMO∙∙∙OH pre-reaction complex for as calculated at the B3LYP/GTBas3 leνel.

| A | 1.40822 |
| --- | --- |
| B | 1.11990 |
| C | 0.85798 |

**Table S107.** Rotational constants in GHz for the TMO∙∙∙OH pre-reaction complex for as calculated at the B3LYP/GTBas3 leνel.

| A | 2.44901 |
| --- | --- |
| B | 0.68065 |
| C | 0.66335 |

**Table S108.** Rotational constants in GHz for the TMO∙∙∙OH pre-reaction complex for as calculated at the B3LYP/GTBas3 leνel.

| A | 1.40808 |
| --- | --- |
| B | 1.11972 |
| C | 0.85783 |

**Table S109.** Rotational constants in GHz for the TMO∙∙∙OH pre-reaction complex for as calculated at the B3LYP/GTBas3 leνel.

| A | 2.00550 |
| --- | --- |
| B | 0.76522 |
| C | 0.71429 |

**Table S110.** Rotational constants in GHz for the TMO∙∙∙OH pre-reaction complex for as calculated at the B3LYP/GTBas3 leνel.

| A | 1.33361 |
| --- | --- |
| B | 1.18704 |
| C | 0.82613 |

**Table S111.** Rotational constants in GHz for the TMO∙∙∙OH transition state as calculated at the B3LYP/GTBas3 leνel.

| A | 1.52520 |
| --- | --- |
| B | 1.17490 |
| C | 0.87833 |

**Table S112.** Rotational constants in GHz for the TMO∙∙∙OH transition state as calculated at the B3LYP/GTBas3 leνel.

| A | 2.36168 |
| --- | --- |
| B | 0.74199 |
| C | 0.71472 |

**Table S113.** Rotational constants in GHz for the TMO∙∙∙OH transition state as calculated at the B3LYP/GTBas3 leνel.

| A | 1.69665 |
| --- | --- |
| B | 0.98618 |
| C | 0.85736 |

**Table S114.** Rotational constants in GHz for the TMO∙∙∙OH transition state as calculated at the B3LYP/GTBas3 leνel.

| A | 1.70483 |
| --- | --- |
| B | 0.91972 |
| C | 0.80722 |

**Table S115.** Rotational constants in GHz for the TMO∙∙∙OH transition state as calculated at the B3LYP/GTBas3 leνel.

| A | 1.38631 |
| --- | --- |
| B | 1.19151 |
| C | 0.85086 |

**Table S116.** Rotational constants in GHz for the TMO∙∙∙OH post-reaction complex for as calculated at the B3LYP/GTBas3 leνel.

| A | 1.37191 |
| --- | --- |
| B | 1.09705 |
| C | 0.78184 |

**Table S117.** Rotational constants in GHz for the TMO∙∙∙OH post-reaction complex for as calculated at the B3LYP/GTBas3 leνel.

| A | 2.30161 |
| --- | --- |
| B | 0.71340 |
| C | 0.69839 |

**Table S118.** Rotational constants in GHz for the TMO∙∙∙OH post-reaction complex for as calculated at the B3LYP/GTBas3 leνel.

| A | 1.44098 |
| --- | --- |
| B | 1.08326 |
| C | 0.84214 |

**Table S119.** Rotational constants in GHz for the TMO∙∙∙OH post-reaction complex for as calculated at the B3LYP/GTBas3 leνel.

| A | 1.80258 |
| --- | --- |
| B | 0.77160 |
| C | 0.69163 |

**Table S120.** Rotational constants in GHz for the TMO∙∙∙OH post-reaction complex for as calculated at the B3LYP/GTBas3 leνel.

| A | 1.30182 |
| --- | --- |
| B | 1.15058 |
| C | 0.79373 |

**Table S121.** Summary of energies, *E*CBS-QB3, and free energies, *G*CBS-QB3, in atomic units (a.u.) for all systems/geometries as calculated at the CBS-QB3 level. 298 K; 1.0 Atm.

| System / Geometry | *E*CBS-QB3 / a.u. | *G*CBS-QB3 / a.u. |
| --- | --- | --- |
| OH | −75.647346 | −75.666634 |
| H2O | −76.334643 | −76.355126 |
| TMO | −388.947313 | −388.991632 |
| TMO (Primary Rad.) | −388.285527 | −388.331802 |
| TMO (Secondary Rad.) | −388.291006 | −388.337040 |
| Pre-Reaction Complex () | −464.605080 | −464.658316 |
| Pre-Reaction Complex () | −464.594014 | −464.648765 |
| Pre-Reaction Complex () | −464.605081 | −464.658318 |
| Pre-Reaction Complex () | −464.593918 | −464.648416 |
| Pre-Reaction Complex () | −464.593261 | −464.647011 |
|  | −464.596386 | −464.646033 |
|  | −464.592562 | −464.643683 |
|  | −464.596696 | −464.646458 |
|  | −464.592839 | −464.644484 |
|  | −464.593287 | −464.644154 |
| Post-Reaction Complex () | −464.621257 | −464.675653 |
| Post-Reaction Complex () | −464.621204 | −464.676386 |
| Post-Reaction Complex () | −464.627345 | −464.681946 |
| Post-Reaction Complex () | −464.625538 | −464.682515 |
| Post-Reaction Complex () | −464.626975 | −464.681615 |

**Table S122.** Summary of energies, *E*G4, and free energies, *G*G4, in atomic units (a.u.) for all systems/geometries as calculated at the G4 level. 298 K; 1.0 Atm.

| System / Geometry | *E*CBS-QB3 / a.u. | *G*CBS-QB3 / a.u. |
| --- | --- | --- |
| OH | −75.707117 | −75.726407 |
| H2O | −76.394416 | −76.414898 |
| TMO | −389.422049 | −389.466577 |
| TMO (Primary Rad.) | −388.763561 | −388.810009 |
| TMO (Secondary Rad.) | −388.768502 | −388.814790 |
| Pre-Reaction Complex () | −465.143568 | −465.196235 |
| Pre-Reaction Complex () | −465.132551 | −465.187452 |
| Pre-Reaction Complex () | −465.143569 | −465.196246 |
| Pre-Reaction Complex () | −465.132604 | −465.187184 |
| Pre-Reaction Complex () | −465.131264 | −465.185264 |
|  | −465.132330 | −465.182073 |
|  | −465.129162 | −465.180566 |
|  | −465.132644 | −465.182738 |
|  | −465.129633 | −465.182123 |
|  | −465.130580 | −465.181849 |
| Post-Reaction Complex () | −465.159249 | −465.213860 |
| Post-Reaction Complex () | −465.159383 | −465.214507 |
| Post-Reaction Complex () | −465.165377 | −465.220398 |
| Post-Reaction Complex () | −465.163176 | −465.220298 |
| Post-Reaction Complex () | −465.164453 | −465.219112 |

**
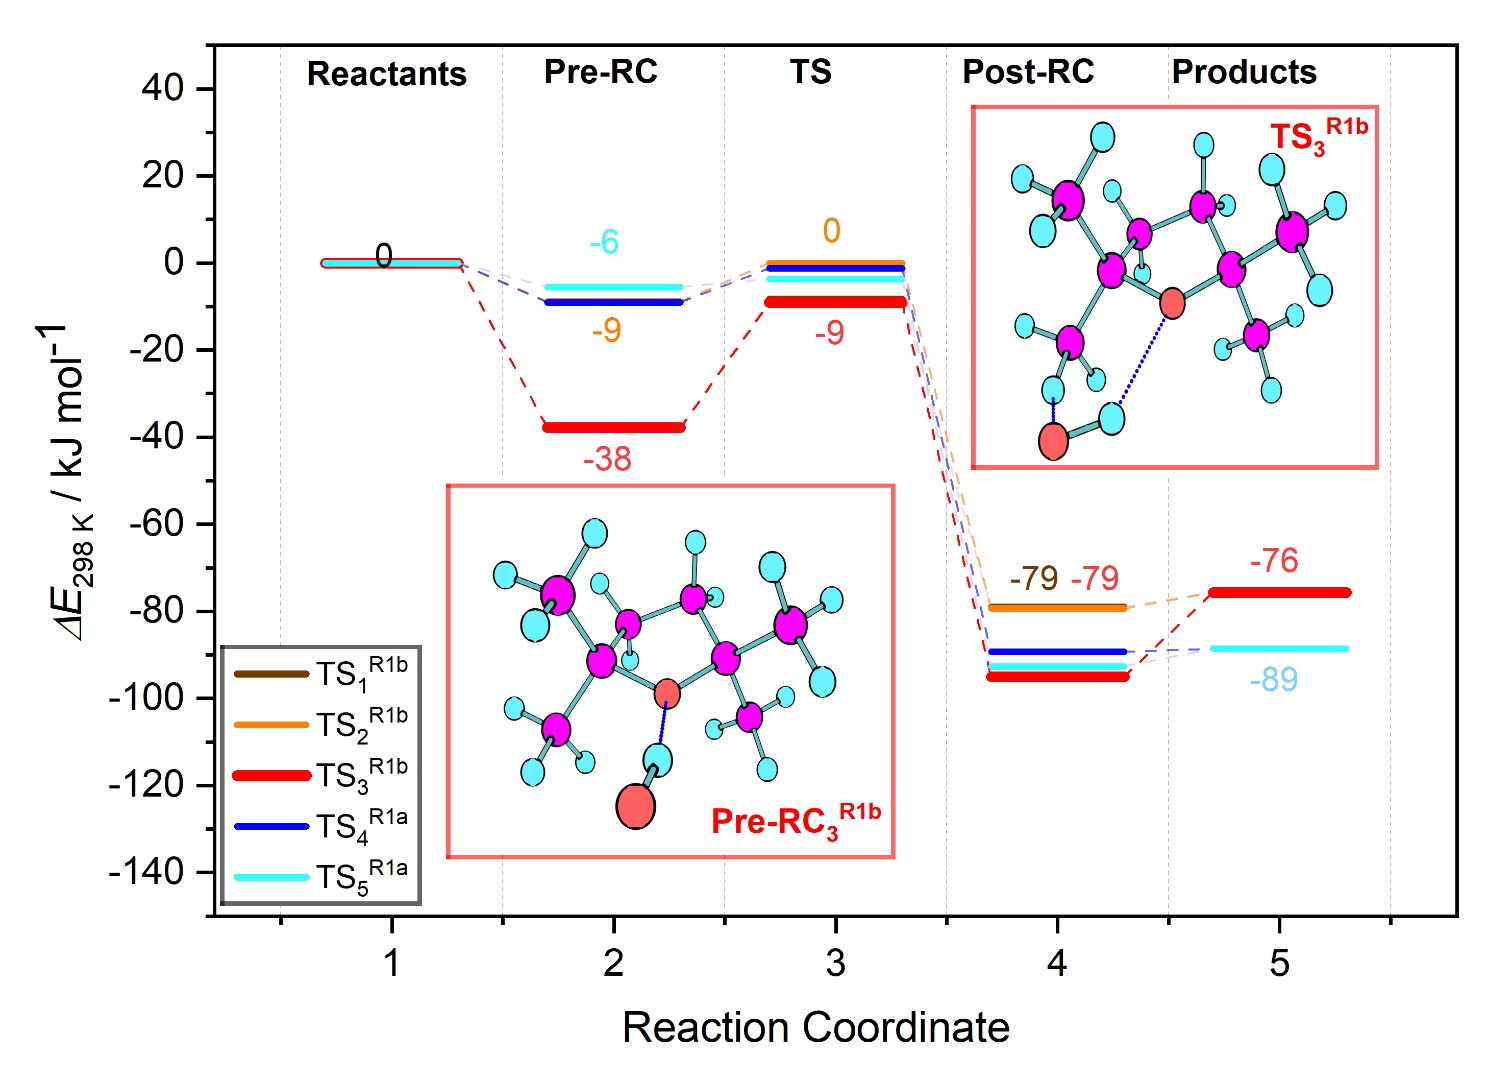
**

Figure 10b. Energy profile of (R1) hydrogen abstraction pathways: two leading to (R1a) products via () and three () leading to (R1b) products, labelled according to the associated transition state in the legend. For each of the five pathways along the reaction coordinate, five stationary point energies (1 = separated reactants, 2 = pre-reaction complex, 3 = transition state, 4 = post-reaction complex, and 5 = separated products) were calculated using the G4 model chemistry. Several were degenerate or near-degenerate, notably the pre-reaction complexes leading to TS1 and TS3.
