# Supplementary material for: Atmospheric breakdown chemistry of the new “green” solvent 2,2,5,5-tetramethyloxolane via gas-phase reactions with OH and Cl radicals
Source: Copernicus journal article supplement (doi:10.5194/acp-22-14589-2022), 2022-11-17
Supplement: Supplementary file 1 [file acp-22-14589-2022-supplement.zip › Supplement_ PLP-LIF and RR.xlsx]

## Sheet: FTIR spectra - Figure 3
Figure 3
TMO			Propene (C3H6)			DimethylEther (CH3OCH3)			Cyclohexane (c-C6H12)
Wavenumber (cm-1)	Absorbance		Wavenumber (cm-1)	Absorbance		Wavenumber (cm-1)	Absorbance		Wavenumber (cm-1)	Absorbance
3999.36	-0.00236		3999.36	-0.00128		3999.36	-0.01615		3999.36	-0.01615
3998.88	-0.00234		3998.88	-0.00075		3998.88	-0.01613		3998.88	-0.01613
3998.4	-0.0019		3998.4	-0.00076		3998.4	-0.01629		3998.4	-0.01629
3997.91	-0.00151		3997.91	-0.00097		3997.91	-0.0163		3997.91	-0.0163
3997.43	-0.00178		3997.43	-0.00097		3997.43	-0.01659		3997.43	-0.01659
3996.95	-0.00208		3996.95	-0.00106		3996.95	-0.01645		3996.95	-0.01645
3996.47	-0.00192		3996.47	-0.00117		3996.47	-0.01587		3996.47	-0.01587
3995.99	-0.00177		3995.99	-0.001		3995.99	-0.01574		3995.99	-0.01574
3995.5	-0.0018		3995.5	-0.00079		3995.5	-0.01583		3995.5	-0.01583
3995.02	-0.00174		3995.02	-0.00071		3995.02	-0.01587		3995.02	-0.01587
3994.54	-0.00162		3994.54	-0.00075		3994.54	-0.01594		3994.54	-0.01594
3994.06	-0.00174		3994.06	-0.00087		3994.06	-0.01607		3994.06	-0.01607
3993.57	-0.00201		3993.57	-0.00089		3993.57	-0.01604		3993.57	-0.01604
3993.09	-0.00198		3993.09	-0.00084		3993.09	-0.01576		3993.09	-0.01576
3992.61	-0.00173		3992.61	-0.00048		3992.61	-0.01576		3992.61	-0.01576
3992.13	-0.0014		3992.13	-0.00031		3992.13	-0.0161		3992.13	-0.0161
3991.65	-0.00131		3991.65	-0.00058		3991.65	-0.01612		3991.65	-0.01612
3991.16	-0.00157		3991.16	-0.00065		3991.16	-0.01591		3991.16	-0.01591
3990.68	-0.0018		3990.68	-0.00085		3990.68	-0.01581		3990.68	-0.01581
3990.2	-0.00175		3990.2	-0.00086		3990.2	-0.0161		3990.2	-0.0161
3989.72	-0.00153		3989.72	-0.0006		3989.72	-0.01628		3989.72	-0.01628
3989.24	-0.00182		3989.24	-0.00068		3989.24	-0.0159		3989.24	-0.0159
3988.75	-0.00238		3988.75	-0.00093		3988.75	-0.01578		3988.75	-0.01578
3988.27	-0.00247		3988.27	-0.0013		3988.27	-0.01593		3988.27	-0.01593
3987.79	-0.00223		3987.79	-0.00147		3987.79	-0.01602		3987.79	-0.01602
3987.31	-0.00192		3987.31	-0.00124		3987.31	-0.01623		3987.31	-0.01623
3986.82	-0.00202		3986.82	-0.00099		3986.82	-0.01657		3986.82	-0.01657
3986.34	-0.00233		3986.34	-0.00089		3986.34	-0.01672		3986.34	-0.01672
3985.86	-0.00237		3985.86	-0.00091		3985.86	-0.01629		3985.86	-0.01629
3985.38	-0.00215		3985.38	-0.00079		3985.38	-0.01583		3985.38	-0.01583
3984.9	-0.00179		3984.9	-0.00053		3984.9	-0.01591		3984.9	-0.01591
3984.41	-0.00168		3984.41	-0.00056		3984.41	-0.01661		3984.41	-0.01661
3983.93	-0.00187		3983.93	-0.00112		3983.93	-0.01708		3983.93	-0.01708
3983.45	-0.00204		3983.45	-0.00138		3983.45	-0.0166		3983.45	-0.0166
3982.97	-0.00199		3982.97	-0.00089		3982.97	-0.01636		3982.97	-0.01636
3982.49	-0.00179		3982.49	-0.00047		3982.49	-0.0164		3982.49	-0.0164
3982	-0.00157		3982	-0.00049		3982	-0.0162		3982	-0.0162
3981.52	-0.00126		3981.52	-0.00055		3981.52	-0.0162		3981.52	-0.0162
3981.04	-0.00128		3981.04	-0.00053		3981.04	-0.01634		3981.04	-0.01634
3980.56	-0.00177		3980.56	-0.00068		3980.56	-0.01647		3980.56	-0.01647
3980.07	-0.00218		3980.07	-0.00107		3980.07	-0.01636		3980.07	-0.01636
3979.59	-0.00217		3979.59	-0.00139		3979.59	-0.01617		3979.59	-0.01617
3979.11	-0.00181		3979.11	-0.00171		3979.11	-0.01623		3979.11	-0.01623
3978.63	-0.00139		3978.63	-0.00209		3978.63	-0.01648		3978.63	-0.01648
3978.15	-0.0013		3978.15	-0.00186		3978.15	-0.0168		3978.15	-0.0168
3977.66	-0.00169		3977.66	-0.00126		3977.66	-0.0168		3977.66	-0.0168
3977.18	-0.00212		3977.18	-0.00093		3977.18	-0.01658		3977.18	-0.01658
3976.7	-0.00227		3976.7	-0.0009		3976.7	-0.01672		3976.7	-0.01672
3976.22	-0.00222		3976.22	-0.00134		3976.22	-0.017		3976.22	-0.017
3975.74	-0.00208		3975.74	-0.00146		3975.74	-0.01705		3975.74	-0.01705
3975.25	-0.0018		3975.25	-0.00103		3975.25	-0.01669		3975.25	-0.01669
3974.77	-0.0015		3974.77	-0.00083		3974.77	-0.01622		3974.77	-0.01622
3974.29	-0.00133		3974.29	-0.00087		3974.29	-0.01634		3974.29	-0.01634
3973.81	-0.00131		3973.81	-0.00107		3973.81	-0.01691		3973.81	-0.01691
3973.32	-0.00136		3973.32	-0.00122		3973.32	-0.01715		3973.32	-0.01715
3972.84	-0.0014		3972.84	-0.00146		3972.84	-0.01661		3972.84	-0.01661
3972.36	-0.00151		3972.36	-0.00146		3972.36	-0.01606		3972.36	-0.01606
3971.88	-0.00171		3971.88	-0.00094		3971.88	-0.01611		3971.88	-0.01611
3971.4	-0.00208		3971.4	-0.00092		3971.4	-0.01615		3971.4	-0.01615
3970.91	-0.0024		3970.91	-0.00113		3970.91	-0.01618		3970.91	-0.01618
3970.43	-0.00221		3970.43	-0.00087		3970.43	-0.01648		3970.43	-0.01648
3969.95	-0.0018		3969.95	-0.00073		3969.95	-0.01684		3969.95	-0.01684
3969.47	-0.00156		3969.47	-0.00089		3969.47	-0.01699		3969.47	-0.01699
3968.99	-0.00186		3968.99	-0.00068		3968.99	-0.01689		3968.99	-0.01689
3968.5	-0.00229		3968.5	-0.00055		3968.5	-0.01681		3968.5	-0.01681
3968.02	-0.00243		3968.02	-0.00092		3968.02	-0.01688		3968.02	-0.01688
3967.54	-0.0027		3967.54	-0.0008		3967.54	-0.0172		3967.54	-0.0172
3967.06	-0.00246		3967.06	-0.0002		3967.06	-0.01715		3967.06	-0.01715
3966.57	-0.00158		3966.57	4e-05		3966.57	-0.01651		3966.57	-0.01651
3966.09	-0.00126		3966.09	-0.00031		3966.09	-0.016		3966.09	-0.016
3965.61	-0.00162		3965.61	-0.00106		3965.61	-0.0157		3965.61	-0.0157
3965.13	-0.00192		3965.13	-0.00168		3965.13	-0.01588		3965.13	-0.01588
3964.65	-0.00187		3964.65	-0.00181		3964.65	-0.01629		3964.65	-0.01629
3964.16	-0.00187		3964.16	-0.00155		3964.16	-0.01664		3964.16	-0.01664
3963.68	-0.00209		3963.68	-0.00109		3963.68	-0.01701		3963.68	-0.01701
3963.2	-0.00215		3963.2	-0.00086		3963.2	-0.01679		3963.2	-0.01679
3962.72	-0.0018		3962.72	-0.0016		3962.72	-0.01656		3962.72	-0.01656
3962.24	-0.00151		3962.24	-0.00212		3962.24	-0.01635		3962.24	-0.01635
3961.75	-0.00168		3961.75	-0.00148		3961.75	-0.01601		3961.75	-0.01601
3961.27	-0.0019		3961.27	-0.00115		3961.27	-0.01632		3961.27	-0.01632
3960.79	-0.00207		3960.79	-0.00116		3960.79	-0.01661		3960.79	-0.01661
3960.31	-0.0021		3960.31	-0.0009		3960.31	-0.01676		3960.31	-0.01676
3959.82	-0.00202		3959.82	-0.00072		3959.82	-0.01701		3959.82	-0.01701
3959.34	-0.00207		3959.34	-0.00082		3959.34	-0.01683		3959.34	-0.01683
3958.86	-0.00202		3958.86	-0.00093		3958.86	-0.01673		3958.86	-0.01673
3958.38	-0.00188		3958.38	-0.00095		3958.38	-0.01686		3958.38	-0.01686
3957.9	-0.00182		3957.9	-0.00125		3957.9	-0.01709		3957.9	-0.01709
3957.41	-0.00189		3957.41	-0.00146		3957.41	-0.0171		3957.41	-0.0171
3956.93	-0.00179		3956.93	-0.00165		3956.93	-0.01675		3956.93	-0.01675
3956.45	-0.00143		3956.45	-0.00192		3956.45	-0.01666		3956.45	-0.01666
3955.97	-0.0015		3955.97	-0.00157		3955.97	-0.01659		3955.97	-0.01659
3955.49	-0.00182		3955.49	-0.00111		3955.49	-0.01652		3955.49	-0.01652
3955	-0.00197		3955	-0.00096		3955	-0.01684		3955	-0.01684
3954.52	-0.00212		3954.52	-0.00079		3954.52	-0.01709		3954.52	-0.01709
3954.04	-0.00196		3954.04	-0.00092		3954.04	-0.0169		3954.04	-0.0169
3953.56	-0.0018		3953.56	-0.00161		3953.56	-0.01645		3953.56	-0.01645
3953.07	-0.002		3953.07	-0.00186		3953.07	-0.01644		3953.07	-0.01644
3952.59	-0.00192		3952.59	-0.00142		3952.59	-0.01678		3952.59	-0.01678
3952.11	-0.00156		3952.11	-0.00141		3952.11	-0.0171		3952.11	-0.0171
3951.63	-0.00155		3951.63	-0.0016		3951.63	-0.01729		3951.63	-0.01729
3951.15	-0.00168		3951.15	-0.00122		3951.15	-0.01712		3951.15	-0.01712
3950.66	-0.00203		3950.66	-0.00081		3950.66	-0.01695		3950.66	-0.01695
3950.18	-0.00242		3950.18	-0.0012		3950.18	-0.01684		3950.18	-0.01684
3949.7	-0.00189		3949.7	-0.00176		3949.7	-0.01677		3949.7	-0.01677
3949.22	-0.0014		3949.22	-0.00136		3949.22	-0.0169		3949.22	-0.0169
3948.74	-0.00164		3948.74	-0.00081		3948.74	-0.01714		3948.74	-0.01714
3948.25	-0.00183		3948.25	-0.00099		3948.25	-0.01738		3948.25	-0.01738
3947.77	-0.00204		3947.77	-0.00144		3947.77	-0.01734		3947.77	-0.01734
3947.29	-0.00233		3947.29	-0.0017		3947.29	-0.01737		3947.29	-0.01737
3946.81	-0.00248		3946.81	-0.00164		3946.81	-0.01748		3946.81	-0.01748
3946.33	-0.00214		3946.33	-0.00165		3946.33	-0.0173		3946.33	-0.0173
3945.84	-0.00177		3945.84	-0.00176		3945.84	-0.01694		3945.84	-0.01694
3945.36	-0.00221		3945.36	-0.00156		3945.36	-0.01662		3945.36	-0.01662
3944.88	-0.00278		3944.88	-0.00133		3944.88	-0.01646		3944.88	-0.01646
3944.4	-0.00302		3944.4	-0.00139		3944.4	-0.01644		3944.4	-0.01644
3943.91	-0.00277		3943.91	-0.00158		3943.91	-0.01684		3943.91	-0.01684
3943.43	-0.00199		3943.43	-0.00134		3943.43	-0.01713		3943.43	-0.01713
3942.95	-0.00122		3942.95	-0.00059		3942.95	-0.01658		3942.95	-0.01658
3942.47	-0.00123		3942.47	-0.00034		3942.47	-0.01599		3942.47	-0.01599
3941.99	-0.00215		3941.99	-0.0007		3941.99	-0.01643		3941.99	-0.01643
3941.5	-0.00264		3941.5	-0.00103		3941.5	-0.01718		3941.5	-0.01718
3941.02	-0.00236		3941.02	-0.00093		3941.02	-0.017		3941.02	-0.017
3940.54	-0.00196		3940.54	-0.00073		3940.54	-0.01684		3940.54	-0.01684
3940.06	-0.00178		3940.06	-0.00116		3940.06	-0.01727		3940.06	-0.01727
3939.58	-0.00202		3939.58	-0.00175		3939.58	-0.01709		3939.58	-0.01709
3939.09	-0.00224		3939.09	-0.00202		3939.09	-0.01656		3939.09	-0.01656
3938.61	-0.00232		3938.61	-0.00162		3938.61	-0.01649		3938.61	-0.01649
3938.13	-0.00261		3938.13	-0.00093		3938.13	-0.01669		3938.13	-0.01669
3937.65	-0.00258		3937.65	-0.00091		3937.65	-0.01669		3937.65	-0.01669
3937.16	-0.00221		3937.16	-0.00115		3937.16	-0.01657		3937.16	-0.01657
3936.68	-0.00234		3936.68	-0.00125		3936.68	-0.01656		3936.68	-0.01656
3936.2	-0.00271		3936.2	-0.00109		3936.2	-0.01648		3936.2	-0.01648
3935.72	-0.00267		3935.72	-0.0009		3935.72	-0.01666		3935.72	-0.01666
3935.24	-0.00229		3935.24	-0.00111		3935.24	-0.0168		3935.24	-0.0168
3934.75	-0.00179		3934.75	-0.00149		3934.75	-0.01655		3934.75	-0.01655
3934.27	-0.00182		3934.27	-0.00178		3934.27	-0.01666		3934.27	-0.01666
3933.79	-0.00217		3933.79	-0.00156		3933.79	-0.01686		3933.79	-0.01686
3933.31	-0.00179		3933.31	-0.00123		3933.31	-0.01689		3933.31	-0.01689
3932.83	-0.00085		3932.83	-0.00107		3932.83	-0.01671		3932.83	-0.01671
3932.34	-0.00081		3932.34	-0.00068		3932.34	-0.01603		3932.34	-0.01603
3931.86	-0.00202		3931.86	-0.00035		3931.86	-0.01587		3931.86	-0.01587
3931.38	-0.00244		3931.38	-0.00023		3931.38	-0.01641		3931.38	-0.01641
3930.9	-0.00184		3930.9	-0.00055		3930.9	-0.01667		3930.9	-0.01667
3930.41	-0.00151		3930.41	-0.00108		3930.41	-0.01659		3930.41	-0.01659
3929.93	-0.00174		3929.93	-0.00143		3929.93	-0.01631		3929.93	-0.01631
3929.45	-0.00238		3929.45	-0.00142		3929.45	-0.01629		3929.45	-0.01629
3928.97	-0.0027		3928.97	-0.00068		3928.97	-0.01633		3928.97	-0.01633
3928.49	-0.00225		3928.49	-0.00058		3928.49	-0.01636		3928.49	-0.01636
3928	-0.00188		3928	-0.00138		3928	-0.01662		3928	-0.01662
3927.52	-0.00204		3927.52	-0.00163		3927.52	-0.01662		3927.52	-0.01662
3927.04	-0.00234		3927.04	-0.00149		3927.04	-0.01633		3927.04	-0.01633
3926.56	-0.00213		3926.56	-0.00155		3926.56	-0.01638		3926.56	-0.01638
3926.08	-0.00151		3926.08	-0.00147		3926.08	-0.01699		3926.08	-0.01699
3925.59	-0.00131		3925.59	-0.00122		3925.59	-0.01719		3925.59	-0.01719
3925.11	-0.0016		3925.11	-0.00111		3925.11	-0.01685		3925.11	-0.01685
3924.63	-0.00201		3924.63	-0.001		3924.63	-0.01688		3924.63	-0.01688
3924.15	-0.00237		3924.15	-0.0008		3924.15	-0.01685		3924.15	-0.01685
3923.66	-0.00243		3923.66	-0.00059		3923.66	-0.01634		3923.66	-0.01634
3923.18	-0.00221		3923.18	-0.00053		3923.18	-0.01627		3923.18	-0.01627
3922.7	-0.00219		3922.7	-0.00079		3922.7	-0.01672		3922.7	-0.01672
3922.22	-0.00241		3922.22	-0.00087		3922.22	-0.0169		3922.22	-0.0169
3921.74	-0.0023		3921.74	-0.00081		3921.74	-0.0167		3921.74	-0.0167
3921.25	-0.00194		3921.25	-0.00114		3921.25	-0.01667		3921.25	-0.01667
3920.77	-0.00186		3920.77	-0.00124		3920.77	-0.01691		3920.77	-0.01691
3920.29	-0.00176		3920.29	-0.0005		3920.29	-0.01699		3920.29	-0.01699
3919.81	-0.00183		3919.81	-0.00016		3919.81	-0.01715		3919.81	-0.01715
3919.33	-0.00192		3919.33	-0.00072		3919.33	-0.01738		3919.33	-0.01738
3918.84	-0.00175		3918.84	-0.00093		3918.84	-0.01707		3918.84	-0.01707
3918.36	-0.00187		3918.36	-0.00105		3918.36	-0.01701		3918.36	-0.01701
3917.88	-0.0016		3917.88	-0.00118		3917.88	-0.01696		3917.88	-0.01696
3917.4	-0.00105		3917.4	-0.00084		3917.4	-0.01621		3917.4	-0.01621
3916.91	-0.00149		3916.91	-0.00065		3916.91	-0.01643		3916.91	-0.01643
3916.43	-0.00188		3916.43	-0.00094		3916.43	-0.01718		3916.43	-0.01718
3915.95	-0.00191		3915.95	-0.00133		3915.95	-0.01705		3915.95	-0.01705
3915.47	-0.00218		3915.47	-0.00134		3915.47	-0.01698		3915.47	-0.01698
3914.99	-0.00233		3914.99	-0.00109		3914.99	-0.01731		3914.99	-0.01731
3914.5	-0.00208		3914.5	-0.0007		3914.5	-0.01759		3914.5	-0.01759
3914.02	-0.00191		3914.02	-0.00014		3914.02	-0.01741		3914.02	-0.01741
3913.54	-0.00189		3913.54	-0.00031		3913.54	-0.017		3913.54	-0.017
3913.06	-0.00167		3913.06	-0.00098		3913.06	-0.017		3913.06	-0.017
3912.58	-0.00171		3912.58	-0.00112		3912.58	-0.01706		3912.58	-0.01706
3912.09	-0.00218		3912.09	-0.00094		3912.09	-0.0169		3912.09	-0.0169
3911.61	-0.00256		3911.61	-0.00096		3911.61	-0.01702		3911.61	-0.01702
3911.13	-0.00237		3911.13	-0.00124		3911.13	-0.01736		3911.13	-0.01736
3910.65	-0.00161		3910.65	-0.00145		3910.65	-0.01745		3910.65	-0.01745
3910.16	-0.00133		3910.16	-0.00148		3910.16	-0.01719		3910.16	-0.01719
3909.68	-0.00167		3909.68	-0.00147		3909.68	-0.01694		3909.68	-0.01694
3909.2	-0.00167		3909.2	-0.00125		3909.2	-0.01683		3909.2	-0.01683
3908.72	-0.00154		3908.72	-0.00085		3908.72	-0.0168		3908.72	-0.0168
3908.24	-0.00175		3908.24	-0.00084		3908.24	-0.01699		3908.24	-0.01699
3907.75	-0.002		3907.75	-0.00105		3907.75	-0.01723		3907.75	-0.01723
3907.27	-0.00201		3907.27	-0.00123		3907.27	-0.01737		3907.27	-0.01737
3906.79	-0.0018		3906.79	-0.00149		3906.79	-0.01699		3906.79	-0.01699
3906.31	-0.00131		3906.31	-0.00125		3906.31	-0.01655		3906.31	-0.01655
3905.83	-0.00106		3905.83	-0.00087		3905.83	-0.01681		3905.83	-0.01681
3905.34	-0.00123		3905.34	-0.00054		3905.34	-0.01705		3905.34	-0.01705
3904.86	-0.00077		3904.86	3e-05		3904.86	-0.01689		3904.86	-0.01689
3904.38	-0.00026		3904.38	0.00016		3904.38	-0.01625		3904.38	-0.01625
3903.9	-0.00117		3903.9	-0.00017		3903.9	-0.01643		3903.9	-0.01643
3903.41	-0.00199		3903.41	-0.00069		3903.41	-0.01797		3903.41	-0.01797
3902.93	-0.00188		3902.93	-0.00127		3902.93	-0.01816		3902.93	-0.01816
3902.45	-0.00097		3902.45	-0.00146		3902.45	-0.01708		3902.45	-0.01708
3901.97	-0.00026		3901.97	-0.00091		3901.97	-0.016		3901.97	-0.016
3901.49	-0.001		3901.49	-0.00012		3901.49	-0.01549		3901.49	-0.01549
3901	-0.00145		3901	-0.00055		3901	-0.01634		3901	-0.01634
3900.52	-0.00128		3900.52	-0.00116		3900.52	-0.01708		3900.52	-0.01708
3900.04	-0.00072		3900.04	-0.00092		3900.04	-0.0173		3900.04	-0.0173
3899.56	0.00019		3899.56	-0.00016		3899.56	-0.01673		3899.56	-0.01673
3899.08	-0.00017		3899.08	7e-05		3899.08	-0.01599		3899.08	-0.01599
3898.59	-0.00122		3898.59	-0.00042		3898.59	-0.01666		3898.59	-0.01666
3898.11	-0.00166		3898.11	-0.00065		3898.11	-0.01781		3898.11	-0.01781
3897.63	-0.00176		3897.63	-0.0009		3897.63	-0.01805		3897.63	-0.01805
3897.15	-0.00162		3897.15	-0.00137		3897.15	-0.01772		3897.15	-0.01772
3896.66	-0.00164		3896.66	-0.00131		3896.66	-0.01777		3896.66	-0.01777
3896.18	-0.00192		3896.18	-0.00074		3896.18	-0.01747		3896.18	-0.01747
3895.7	-0.00197		3895.7	-0.00071		3895.7	-0.01718		3895.7	-0.01718
3895.22	-0.0019		3895.22	-0.00104		3895.22	-0.01749		3895.22	-0.01749
3894.74	-0.00198		3894.74	-0.00081		3894.74	-0.01743		3894.74	-0.01743
3894.25	-0.0019		3894.25	-0.00083		3894.25	-0.01726		3894.25	-0.01726
3893.77	-0.00171		3893.77	-0.00143		3893.77	-0.01727		3893.77	-0.01727
3893.29	-0.00145		3893.29	-0.0016		3893.29	-0.01743		3893.29	-0.01743
3892.81	-0.00144		3892.81	-0.00122		3892.81	-0.01751		3892.81	-0.01751
3892.33	-0.00143		3892.33	-0.00087		3892.33	-0.01721		3892.33	-0.01721
3891.84	-0.00032		3891.84	-0.00119		3891.84	-0.01687		3891.84	-0.01687
3891.36	0.00025		3891.36	-0.00166		3891.36	-0.01662		3891.36	-0.01662
3890.88	-0.00111		3890.88	-0.00156		3890.88	-0.01637		3890.88	-0.01637
3890.4	-0.0015		3890.4	-0.00159		3890.4	-0.01711		3890.4	-0.01711
3889.91	-0.00119		3889.91	-0.00178		3889.91	-0.01761		3889.91	-0.01761
3889.43	-0.00132		3889.43	-0.00183		3889.43	-0.01762		3889.43	-0.01762
3888.95	-0.00162		3888.95	-0.00158		3888.95	-0.0175		3888.95	-0.0175
3888.47	-0.00184		3888.47	-0.00118		3888.47	-0.01733		3888.47	-0.01733
3887.99	-0.00187		3887.99	-0.0012		3887.99	-0.01719		3887.99	-0.01719
3887.5	-0.00178		3887.5	-0.00143		3887.5	-0.01723		3887.5	-0.01723
3887.02	-0.00192		3887.02	-0.00119		3887.02	-0.01731		3887.02	-0.01731
3886.54	-0.00126		3886.54	-0.00071		3886.54	-0.01708		3886.54	-0.01708
3886.06	0.00043		3886.06	-0.00042		3886.06	-0.01714		3886.06	-0.01714
3885.58	0.00014		3885.58	-0.00047		3885.58	-0.01744		3885.58	-0.01744
3885.09	-0.00167		3885.09	-0.00104		3885.09	-0.01733		3885.09	-0.01733
3884.61	-0.00247		3884.61	-0.00178		3884.61	-0.01786		3884.61	-0.01786
3884.13	-0.00255		3884.13	-0.0019		3884.13	-0.01837		3884.13	-0.01837
3883.65	-0.00209		3883.65	-0.00114		3883.65	-0.01828		3883.65	-0.01828
3883.16	-0.00186		3883.16	-0.00105		3883.16	-0.01796		3883.16	-0.01796
3882.68	-0.00202		3882.68	-0.0019		3882.68	-0.0179		3882.68	-0.0179
3882.2	-0.00201		3882.2	-0.00193		3882.2	-0.0178		3882.2	-0.0178
3881.72	-0.00149		3881.72	-0.00132		3881.72	-0.01732		3881.72	-0.01732
3881.24	-0.00061		3881.24	-0.00102		3881.24	-0.01693		3881.24	-0.01693
3880.75	1e-05		3880.75	-0.00103		3880.75	-0.01668		3880.75	-0.01668
3880.27	-0.00025		3880.27	-0.00115		3880.27	-0.01627		3880.27	-0.01627
3879.79	-0.00148		3879.79	-0.00155		3879.79	-0.016		3879.79	-0.016
3879.31	-0.0022		3879.31	-0.00198		3879.31	-0.01656		3879.31	-0.01656
3878.83	-0.00213		3878.83	-0.00182		3878.83	-0.01713		3878.83	-0.01713
3878.34	-0.00167		3878.34	-0.00148		3878.34	-0.01738		3878.34	-0.01738
3877.86	-0.00119		3877.86	-0.00155		3877.86	-0.01762		3877.86	-0.01762
3877.38	-0.00134		3877.38	-0.00142		3877.38	-0.01775		3877.38	-0.01775
3876.9	-0.00208		3876.9	-0.00113		3876.9	-0.01761		3876.9	-0.01761
3876.41	-0.00251		3876.41	-0.00122		3876.41	-0.01788		3876.41	-0.01788
3875.93	-0.00222		3875.93	-0.00146		3875.93	-0.01794		3875.93	-0.01794
3875.45	-0.0019		3875.45	-0.00158		3875.45	-0.01759		3875.45	-0.01759
3874.97	-0.00153		3874.97	-0.00139		3874.97	-0.01714		3874.97	-0.01714
3874.49	-0.00072		3874.49	-0.00104		3874.49	-0.01645		3874.49	-0.01645
3874	-0.00063		3874	-0.00091		3874	-0.01638		3874	-0.01638
3873.52	-0.0014		3873.52	-0.00114		3873.52	-0.01708		3873.52	-0.01708
3873.04	-0.00187		3873.04	-0.00159		3873.04	-0.01754		3873.04	-0.01754
3872.56	-0.00187		3872.56	-0.00159		3872.56	-0.01729		3872.56	-0.01729
3872.08	-0.00151		3872.08	-0.00139		3872.08	-0.01719		3872.08	-0.01719
3871.59	-0.0015		3871.59	-0.00165		3871.59	-0.0175		3871.59	-0.0175
3871.11	-0.00127		3871.11	-0.00171		3871.11	-0.01782		3871.11	-0.01782
3870.63	0.00026		3870.63	-0.00134		3870.63	-0.0178		3870.63	-0.0178
3870.15	0.00145		3870.15	-0.001		3870.15	-0.01734		3870.15	-0.01734
3869.66	0.00105		3869.66	-0.00134		3869.66	-0.01662		3869.66	-0.01662
3869.18	0.00035		3869.18	-0.00161		3869.18	-0.01624		3869.18	-0.01624
3868.7	-0.00092		3868.7	-0.00149		3868.7	-0.01687		3868.7	-0.01687
3868.22	-0.00163		3868.22	-0.00161		3868.22	-0.01793		3868.22	-0.01793
3867.74	-0.00173		3867.74	-0.0017		3867.74	-0.01788		3867.74	-0.01788
3867.25	-0.00174		3867.25	-0.00176		3867.25	-0.01744		3867.25	-0.01744
3866.77	-0.00149		3866.77	-0.00194		3866.77	-0.01734		3866.77	-0.01734
3866.29	-0.00148		3866.29	-0.00204		3866.29	-0.01732		3866.29	-0.01732
3865.81	-0.00113		3865.81	-0.00173		3865.81	-0.01688		3865.81	-0.01688
3865.33	-0.00044		3865.33	-0.00105		3865.33	-0.01617		3865.33	-0.01617
3864.84	-0.00054		3864.84	-0.00091		3864.84	-0.01618		3864.84	-0.01618
3864.36	-0.00049		3864.36	-0.00113		3864.36	-0.01686		3864.36	-0.01686
3863.88	-0.00068		3863.88	-0.00154		3863.88	-0.01754		3863.88	-0.01754
3863.4	-0.00155		3863.4	-0.00186		3863.4	-0.0177		3863.4	-0.0177
3862.91	-0.00174		3862.91	-0.00161		3862.91	-0.01772		3862.91	-0.01772
3862.43	-0.00088		3862.43	-0.00151		3862.43	-0.01765		3862.43	-0.01765
3861.95	-0.00011		3861.95	-0.00159		3861.95	-0.01729		3861.95	-0.01729
3861.47	-0.00089		3861.47	-0.00142		3861.47	-0.01703		3861.47	-0.01703
3860.99	-0.00197		3860.99	-0.00122		3860.99	-0.01728		3860.99	-0.01728
3860.5	-0.00217		3860.5	-0.00125		3860.5	-0.01764		3860.5	-0.01764
3860.02	-0.00203		3860.02	-0.00161		3860.02	-0.0179		3860.02	-0.0179
3859.54	-0.00166		3859.54	-0.00195		3859.54	-0.01802		3859.54	-0.01802
3859.06	-0.00158		3859.06	-0.00168		3859.06	-0.01788		3859.06	-0.01788
3858.58	-0.00181		3858.58	-0.00123		3858.58	-0.01776		3858.58	-0.01776
3858.09	-0.00162		3858.09	-0.00158		3858.09	-0.01779		3858.09	-0.01779
3857.61	-0.00097		3857.61	-0.00177		3857.61	-0.01751		3857.61	-0.01751
3857.13	-0.00041		3857.13	-0.00143		3857.13	-0.01699		3857.13	-0.01699
3856.65	-0.00054		3856.65	-0.00165		3856.65	-0.01686		3856.65	-0.01686
3856.16	-0.00062		3856.16	-0.00177		3856.16	-0.01742		3856.16	-0.01742
3855.68	-0.00066		3855.68	-0.00173		3855.68	-0.01806		3855.68	-0.01806
3855.2	-0.00049		3855.2	-0.00154		3855.2	-0.01822		3855.2	-0.01822
3854.72	0.00129		3854.72	-0.00107		3854.72	-0.01689		3854.72	-0.01689
3854.24	0.00363		3854.24	-0.00071		3854.24	-0.01408		3854.24	-0.01408
3853.75	0.0002		3853.75	-0.00058		3853.75	-0.01444		3853.75	-0.01444
3853.27	-0.00205		3853.27	-0.00128		3853.27	-0.01741		3853.27	-0.01741
3852.79	-0.00151		3852.79	-0.00171		3852.79	-0.01848		3852.79	-0.01848
3852.31	0.00012		3852.31	-0.00149		3852.31	-0.01852		3852.31	-0.01852
3851.83	-0.0002		3851.83	-0.0012		3851.83	-0.01754		3851.83	-0.01754
3851.34	-0.00149		3851.34	-0.00149		3851.34	-0.01771		3851.34	-0.01771
3850.86	-0.00183		3850.86	-0.00207		3850.86	-0.01822		3850.86	-0.01822
3850.38	-0.00172		3850.38	-0.00234		3850.38	-0.01806		3850.38	-0.01806
3849.9	-0.00133		3849.9	-0.00223		3849.9	-0.01771		3849.9	-0.01771
3849.41	-0.0016		3849.41	-0.00202		3849.41	-0.01733		3849.41	-0.01733
3848.93	-0.00201		3848.93	-0.00181		3848.93	-0.01729		3848.93	-0.01729
3848.45	-0.00195		3848.45	-0.00177		3848.45	-0.01741		3848.45	-0.01741
3847.97	-0.00181		3847.97	-0.00141		3847.97	-0.01734		3847.97	-0.01734
3847.49	-0.00157		3847.49	-0.0011		3847.49	-0.01726		3847.49	-0.01726
3847	-0.00138		3847	-0.00145		3847	-0.01737		3847	-0.01737
3846.52	-0.0016		3846.52	-0.00183		3846.52	-0.01758		3846.52	-0.01758
3846.04	-0.00207		3846.04	-0.00199		3846.04	-0.01756		3846.04	-0.01756
3845.56	-0.0021		3845.56	-0.00203		3845.56	-0.01752		3845.56	-0.01752
3845.08	-0.00173		3845.08	-0.00212		3845.08	-0.01756		3845.08	-0.01756
3844.59	-0.00121		3844.59	-0.00225		3844.59	-0.01764		3844.59	-0.01764
3844.11	-0.00053		3844.11	-0.00183		3844.11	-0.01768		3844.11	-0.01768
3843.63	-0.00084		3843.63	-0.00114		3843.63	-0.01731		3843.63	-0.01731
3843.15	-0.002		3843.15	-0.00139		3843.15	-0.01728		3843.15	-0.01728
3842.66	-0.00233		3842.66	-0.00205		3842.66	-0.01802		3842.66	-0.01802
3842.18	-0.00188		3842.18	-0.00218		3842.18	-0.0181		3842.18	-0.0181
3841.7	-0.0012		3841.7	-0.00177		3841.7	-0.01796		3841.7	-0.01796
3841.22	-0.00098		3841.22	-0.00125		3841.22	-0.01782		3841.22	-0.01782
3840.74	-0.00128		3840.74	-0.00114		3840.74	-0.01756		3840.74	-0.01756
3840.25	-0.00138		3840.25	-0.00152		3840.25	-0.01771		3840.25	-0.01771
3839.77	-0.0013		3839.77	-0.00193		3839.77	-0.01755		3839.77	-0.01755
3839.29	-0.00121		3839.29	-0.00235		3839.29	-0.01756		3839.29	-0.01756
3838.81	-0.00085		3838.81	-0.00244		3838.81	-0.01792		3838.81	-0.01792
3838.33	0.00048		3838.33	-0.00204		3838.33	-0.01794		3838.33	-0.01794
3837.84	0.00125		3837.84	-0.00163		3837.84	-0.01856		3837.84	-0.01856
3837.36	-0.0011		3837.36	-0.00192		3837.36	-0.01877		3837.36	-0.01877
3836.88	-0.00204		3836.88	-0.00241		3836.88	-0.0187		3836.88	-0.0187
3836.4	-0.00183		3836.4	-0.00245		3836.4	-0.01801		3836.4	-0.01801
3835.91	-0.00154		3835.91	-0.00195		3835.91	-0.01788		3835.91	-0.01788
3835.43	-0.00093		3835.43	-0.00147		3835.43	-0.01785		3835.43	-0.01785
3834.95	-0.0007		3834.95	-0.00131		3834.95	-0.01706		3834.95	-0.01706
3834.47	-0.0017		3834.47	-0.00158		3834.47	-0.01646		3834.47	-0.01646
3833.99	-0.00248		3833.99	-0.00199		3833.99	-0.017		3833.99	-0.017
3833.5	-0.0025		3833.5	-0.00217		3833.5	-0.01756		3833.5	-0.01756
3833.02	-0.00236		3833.02	-0.00204		3833.02	-0.01792		3833.02	-0.01792
3832.54	-0.00195		3832.54	-0.00206		3832.54	-0.01811		3832.54	-0.01811
3832.06	-0.00101		3832.06	-0.00209		3832.06	-0.01764		3832.06	-0.01764
3831.58	-0.00077		3831.58	-0.00173		3831.58	-0.01672		3831.58	-0.01672
3831.09	-0.002		3831.09	-0.00193		3831.09	-0.01676		3831.09	-0.01676
3830.61	-0.00262		3830.61	-0.00255		3830.61	-0.01754		3830.61	-0.01754
3830.13	-0.00246		3830.13	-0.00266		3830.13	-0.01788		3830.13	-0.01788
3829.65	-0.00261		3829.65	-0.00194		3829.65	-0.0179		3829.65	-0.0179
3829.16	-0.00237		3829.16	-0.0013		3829.16	-0.01799		3829.16	-0.01799
3828.68	-0.00179		3828.68	-0.00148		3828.68	-0.0182		3828.68	-0.0182
3828.2	-0.00183		3828.2	-0.00162		3828.2	-0.01778		3828.2	-0.01778
3827.72	-0.00185		3827.72	-0.00147		3827.72	-0.01736		3827.72	-0.01736
3827.24	-0.0013		3827.24	-0.00144		3827.24	-0.01718		3827.24	-0.01718
3826.75	-0.00102		3826.75	-0.00136		3826.75	-0.017		3826.75	-0.017
3826.27	-0.00165		3826.27	-0.00137		3826.27	-0.01763		3826.27	-0.01763
3825.79	-0.00218		3825.79	-0.00175		3825.79	-0.01818		3825.79	-0.01818
3825.31	-0.00262		3825.31	-0.00222		3825.31	-0.01788		3825.31	-0.01788
3824.83	-0.00265		3824.83	-0.00203		3824.83	-0.01774		3824.83	-0.01774
3824.34	-0.00199		3824.34	-0.00154		3824.34	-0.01779		3824.34	-0.01779
3823.86	-0.00209		3823.86	-0.00147		3823.86	-0.01799		3823.86	-0.01799
3823.38	-0.00256		3823.38	-0.00169		3823.38	-0.01823		3823.38	-0.01823
3822.9	-0.00221		3822.9	-0.00187		3822.9	-0.01853		3822.9	-0.01853
3822.41	-0.00113		3822.41	-0.00168		3822.41	-0.01847		3822.41	-0.01847
3821.93	-0.0002		3821.93	-0.00134		3821.93	-0.0176		3821.93	-0.0176
3821.45	-0.00033		3821.45	-0.00113		3821.45	-0.01694		3821.45	-0.01694
3820.97	-0.00055		3820.97	-0.00102		3820.97	-0.01645		3820.97	-0.01645
3820.49	-0.00135		3820.49	-0.00113		3820.49	-0.01641		3820.49	-0.01641
3820	-0.0024		3820	-0.00118		3820	-0.0171		3820	-0.0171
3819.52	-0.00263		3819.52	-0.00146		3819.52	-0.01761		3819.52	-0.01761
3819.04	-0.00255		3819.04	-0.00213		3819.04	-0.01793		3819.04	-0.01793
3818.56	-0.00251		3818.56	-0.00259		3818.56	-0.01756		3818.56	-0.01756
3818.08	-0.00234		3818.08	-0.00231		3818.08	-0.01727		3818.08	-0.01727
3817.59	-0.0019		3817.59	-0.00187		3817.59	-0.0179		3817.59	-0.0179
3817.11	-0.00152		3817.11	-0.00188		3817.11	-0.01854		3817.11	-0.01854
3816.63	-0.00041		3816.63	-0.00156		3816.63	-0.01834		3816.63	-0.01834
3816.15	0.00071		3816.15	-0.00068		3816.15	-0.01768		3816.15	-0.01768
3815.66	-0.00124		3815.66	-0.00114		3815.66	-0.0177		3815.66	-0.0177
3815.18	-0.00239		3815.18	-0.00186		3815.18	-0.0182		3815.18	-0.0182
3814.7	-0.00234		3814.7	-0.0021		3814.7	-0.01774		3814.7	-0.01774
3814.22	-0.00237		3814.22	-0.00251		3814.22	-0.01762		3814.22	-0.01762
3813.74	-0.00267		3813.74	-0.00269		3813.74	-0.01774		3813.74	-0.01774
3813.25	-0.00301		3813.25	-0.0022		3813.25	-0.01747		3813.25	-0.01747
3812.77	-0.0032		3812.77	-0.00175		3812.77	-0.01716		3812.77	-0.01716
3812.29	-0.00331		3812.29	-0.0017		3812.29	-0.01756		3812.29	-0.01756
3811.81	-0.00313		3811.81	-0.00175		3811.81	-0.01781		3811.81	-0.01781
3811.33	-0.00269		3811.33	-0.00187		3811.33	-0.01767		3811.33	-0.01767
3810.84	-0.0025		3810.84	-0.00205		3810.84	-0.01775		3810.84	-0.01775
3810.36	-0.0027		3810.36	-0.00216		3810.36	-0.01753		3810.36	-0.01753
3809.88	-0.00255		3809.88	-0.00205		3809.88	-0.01742		3809.88	-0.01742
3809.4	-0.00217		3809.4	-0.00199		3809.4	-0.01763		3809.4	-0.01763
3808.91	-0.00217		3808.91	-0.00232		3808.91	-0.01765		3808.91	-0.01765
3808.43	-0.00223		3808.43	-0.00271		3808.43	-0.01753		3808.43	-0.01753
3807.95	-0.00184		3807.95	-0.00275		3807.95	-0.01766		3807.95	-0.01766
3807.47	-0.00104		3807.47	-0.00231		3807.47	-0.01728		3807.47	-0.01728
3806.99	-0.00147		3806.99	-0.00133		3806.99	-0.01631		3806.99	-0.01631
3806.5	-0.00277		3806.5	-0.00103		3806.5	-0.01657		3806.5	-0.01657
3806.02	-0.00247		3806.02	-0.00156		3806.02	-0.01741		3806.02	-0.01741
3805.54	-0.00202		3805.54	-0.00204		3805.54	-0.01763		3805.54	-0.01763
3805.06	-0.00228		3805.06	-0.00257		3805.06	-0.01781		3805.06	-0.01781
3804.58	-0.00279		3804.58	-0.00315		3804.58	-0.01744		3804.58	-0.01744
3804.09	-0.00277		3804.09	-0.0029		3804.09	-0.01733		3804.09	-0.01733
3803.61	-0.00229		3803.61	-0.00203		3803.61	-0.01744		3803.61	-0.01744
3803.13	-0.0019		3803.13	-0.00171		3803.13	-0.01749		3803.13	-0.01749
3802.65	-0.00184		3802.65	-0.00212		3802.65	-0.01788		3802.65	-0.01788
3802.16	-0.00129		3802.16	-0.00268		3802.16	-0.0182		3802.16	-0.0182
3801.68	0.0004		3801.68	-0.00294		3801.68	-0.0181		3801.68	-0.0181
3801.2	0.00025		3801.2	-0.00254		3801.2	-0.01761		3801.2	-0.01761
3800.72	-0.00169		3800.72	-0.00222		3800.72	-0.01788		3800.72	-0.01788
3800.24	-0.00221		3800.24	-0.00208		3800.24	-0.01826		3800.24	-0.01826
3799.75	-0.00225		3799.75	-0.00201		3799.75	-0.01818		3799.75	-0.01818
3799.27	-0.00228		3799.27	-0.00227		3799.27	-0.01776		3799.27	-0.01776
3798.79	-0.00242		3798.79	-0.00273		3798.79	-0.0174		3798.79	-0.0174
3798.31	-0.00228		3798.31	-0.00289		3798.31	-0.01742		3798.31	-0.01742
3797.83	-0.00215		3797.83	-0.00265		3797.83	-0.01737		3797.83	-0.01737
3797.34	-0.00217		3797.34	-0.00234		3797.34	-0.01765		3797.34	-0.01765
3796.86	-0.00176		3796.86	-0.00209		3796.86	-0.01763		3796.86	-0.01763
3796.38	-0.00152		3796.38	-0.00187		3796.38	-0.01721		3796.38	-0.01721
3795.9	-0.00211		3795.9	-0.00193		3795.9	-0.01709		3795.9	-0.01709
3795.41	-0.00263		3795.41	-0.00213		3795.41	-0.01727		3795.41	-0.01727
3794.93	-0.00253		3794.93	-0.00216		3794.93	-0.01744		3794.93	-0.01744
3794.45	-0.00234		3794.45	-0.00202		3794.45	-0.01736		3794.45	-0.01736
3793.97	-0.00262		3793.97	-0.00201		3793.97	-0.0172		3793.97	-0.0172
3793.49	-0.00296		3793.49	-0.00202		3793.49	-0.01769		3793.49	-0.01769
3793	-0.00289		3793	-0.00182		3793	-0.01801		3793	-0.01801
3792.52	-0.00268		3792.52	-0.00179		3792.52	-0.01762		3792.52	-0.01762
3792.04	-0.00259		3792.04	-0.00205		3792.04	-0.01724		3792.04	-0.01724
3791.56	-0.00235		3791.56	-0.00242		3791.56	-0.01724		3791.56	-0.01724
3791.08	-0.00233		3791.08	-0.00248		3791.08	-0.01743		3791.08	-0.01743
3790.59	-0.00252		3790.59	-0.00222		3790.59	-0.01759		3790.59	-0.01759
3790.11	-0.00251		3790.11	-0.00231		3790.11	-0.01773		3790.11	-0.01773
3789.63	-0.00255		3789.63	-0.00262		3789.63	-0.01791		3789.63	-0.01791
3789.15	-0.00263		3789.15	-0.00279		3789.15	-0.01802		3789.15	-0.01802
3788.66	-0.0026		3788.66	-0.00287		3788.66	-0.01805		3788.66	-0.01805
3788.18	-0.0023		3788.18	-0.00278		3788.18	-0.01778		3788.18	-0.01778
3787.7	-0.00208		3787.7	-0.00258		3787.7	-0.01747		3787.7	-0.01747
3787.22	-0.0022		3787.22	-0.00234		3787.22	-0.01748		3787.22	-0.01748
3786.74	-0.00221		3786.74	-0.00211		3786.74	-0.01743		3786.74	-0.01743
3786.25	-0.00207		3786.25	-0.00205		3786.25	-0.01756		3786.25	-0.01756
3785.77	-0.00203		3785.77	-0.0022		3785.77	-0.01798		3785.77	-0.01798
3785.29	-0.00203		3785.29	-0.00221		3785.29	-0.01824		3785.29	-0.01824
3784.81	-0.00171		3784.81	-0.00175		3784.81	-0.01824		3784.81	-0.01824
3784.33	-0.00165		3784.33	-0.00165		3784.33	-0.018		3784.33	-0.018
3783.84	-0.00223		3783.84	-0.00208		3783.84	-0.01764		3783.84	-0.01764
3783.36	-0.00254		3783.36	-0.00223		3783.36	-0.01728		3783.36	-0.01728
3782.88	-0.0027		3782.88	-0.00222		3782.88	-0.01729		3782.88	-0.01729
3782.4	-0.00282		3782.4	-0.00235		3782.4	-0.01739		3782.4	-0.01739
3781.91	-0.00278		3781.91	-0.0026		3781.91	-0.01729		3781.91	-0.01729
3781.43	-0.00284		3781.43	-0.00283		3781.43	-0.01738		3781.43	-0.01738
3780.95	-0.00297		3780.95	-0.00267		3780.95	-0.01765		3780.95	-0.01765
3780.47	-0.00278		3780.47	-0.00231		3780.47	-0.01794		3780.47	-0.01794
3779.99	-0.00193		3779.99	-0.00215		3779.99	-0.01746		3779.99	-0.01746
3779.5	-0.00143		3779.5	-0.00219		3779.5	-0.01634		3779.5	-0.01634
3779.02	-0.00207		3779.02	-0.00232		3779.02	-0.01627		3779.02	-0.01627
3778.54	-0.00254		3778.54	-0.00235		3778.54	-0.01729		3778.54	-0.01729
3778.06	-0.00266		3778.06	-0.00225		3778.06	-0.01773		3778.06	-0.01773
3777.58	-0.00276		3777.58	-0.00239		3777.58	-0.01777		3777.58	-0.01777
3777.09	-0.00285		3777.09	-0.00282		3777.09	-0.01779		3777.09	-0.01779
3776.61	-0.003		3776.61	-0.00273		3776.61	-0.01788		3776.61	-0.01788
3776.13	-0.00298		3776.13	-0.00225		3776.13	-0.0178		3776.13	-0.0178
3775.65	-0.0029		3775.65	-0.00232		3775.65	-0.0175		3775.65	-0.0175
3775.16	-0.00282		3775.16	-0.00246		3775.16	-0.01734		3775.16	-0.01734
3774.68	-0.00257		3774.68	-0.0024		3774.68	-0.01746		3774.68	-0.01746
3774.2	-0.00235		3774.2	-0.00239		3774.2	-0.01766		3774.2	-0.01766
3773.72	-0.0022		3773.72	-0.0021		3773.72	-0.01759		3773.72	-0.01759
3773.24	-0.00226		3773.24	-0.0021		3773.24	-0.01748		3773.24	-0.01748
3772.75	-0.00282		3772.75	-0.00246		3772.75	-0.01752		3772.75	-0.01752
3772.27	-0.00313		3772.27	-0.00252		3772.27	-0.0176		3772.27	-0.0176
3771.79	-0.00292		3771.79	-0.00246		3771.79	-0.01804		3771.79	-0.01804
3771.31	-0.00266		3771.31	-0.0025		3771.31	-0.01831		3771.31	-0.01831
3770.83	-0.00213		3770.83	-0.00253		3770.83	-0.01787		3770.83	-0.01787
3770.34	-0.00147		3770.34	-0.00202		3770.34	-0.01699		3770.34	-0.01699
3769.86	-0.00165		3769.86	-0.00145		3769.86	-0.0164		3769.86	-0.0164
3769.38	-0.00282		3769.38	-0.00187		3769.38	-0.01681		3769.38	-0.01681
3768.9	-0.00339		3768.9	-0.00202		3768.9	-0.0175		3768.9	-0.0175
3768.41	-0.00305		3768.41	-0.00176		3768.41	-0.01752		3768.41	-0.01752
3767.93	-0.00275		3767.93	-0.00159		3767.93	-0.01763		3767.93	-0.01763
3767.45	-0.00293		3767.45	-0.00176		3767.45	-0.01756		3767.45	-0.01756
3766.97	-0.00286		3766.97	-0.00224		3766.97	-0.01754		3766.97	-0.01754
3766.49	-0.0023		3766.49	-0.00251		3766.49	-0.01743		3766.49	-0.01743
3766	-0.0017		3766	-0.00263		3766	-0.01697		3766	-0.01697
3765.52	-0.00172		3765.52	-0.00263		3765.52	-0.01697		3765.52	-0.01697
3765.04	-0.0023		3765.04	-0.00249		3765.04	-0.01713		3765.04	-0.01713
3764.56	-0.00275		3764.56	-0.00258		3764.56	-0.01706		3764.56	-0.01706
3764.08	-0.00301		3764.08	-0.00272		3764.08	-0.01713		3764.08	-0.01713
3763.59	-0.00321		3763.59	-0.00248		3763.59	-0.01721		3763.59	-0.01721
3763.11	-0.0033		3763.11	-0.00223		3763.11	-0.01705		3763.11	-0.01705
3762.63	-0.00304		3762.63	-0.00256		3762.63	-0.01683		3762.63	-0.01683
3762.15	-0.00264		3762.15	-0.0028		3762.15	-0.01696		3762.15	-0.01696
3761.66	-0.00241		3761.66	-0.00265		3761.66	-0.01728		3761.66	-0.01728
3761.18	-0.00234		3761.18	-0.00282		3761.18	-0.01742		3761.18	-0.01742
3760.7	-0.00231		3760.7	-0.00313		3760.7	-0.01759		3760.7	-0.01759
3760.22	-0.00191		3760.22	-0.00294		3760.22	-0.01749		3760.22	-0.01749
3759.74	-0.00139		3759.74	-0.00228		3759.74	-0.01712		3759.74	-0.01712
3759.25	-0.00163		3759.25	-0.00209		3759.25	-0.01701		3759.25	-0.01701
3758.77	-0.00241		3758.77	-0.00253		3758.77	-0.01724		3758.77	-0.01724
3758.29	-0.00289		3758.29	-0.0027		3758.29	-0.0172		3758.29	-0.0172
3757.81	-0.00273		3757.81	-0.00233		3757.81	-0.01732		3757.81	-0.01732
3757.33	-0.00232		3757.33	-0.00195		3757.33	-0.01756		3757.33	-0.01756
3756.84	-0.00192		3756.84	-0.0021		3756.84	-0.01738		3756.84	-0.01738
3756.36	-0.00201		3756.36	-0.00258		3756.36	-0.01719		3756.36	-0.01719
3755.88	-0.00259		3755.88	-0.00284		3755.88	-0.0175		3755.88	-0.0175
3755.4	-0.00317		3755.4	-0.0028		3755.4	-0.01769		3755.4	-0.01769
3754.91	-0.00347		3754.91	-0.00244		3754.91	-0.01779		3754.91	-0.01779
3754.43	-0.00303		3754.43	-0.00221		3754.43	-0.01805		3754.43	-0.01805
3753.95	-0.00264		3753.95	-0.00251		3753.95	-0.01821		3753.95	-0.01821
3753.47	-0.00245		3753.47	-0.00261		3753.47	-0.01797		3753.47	-0.01797
3752.99	-0.00138		3752.99	-0.00207		3752.99	-0.01731		3752.99	-0.01731
3752.5	7e-05		3752.5	-0.00179		3752.5	-0.01675		3752.5	-0.01675
3752.02	-0.00075		3752.02	-0.00184		3752.02	-0.01732		3752.02	-0.01732
3751.54	-0.00236		3751.54	-0.00116		3751.54	-0.01851		3751.54	-0.01851
3751.06	-0.00251		3751.06	-0.001		3751.06	-0.01873		3751.06	-0.01873
3750.58	-0.0023		3750.58	-0.00128		3750.58	-0.01839		3750.58	-0.01839
3750.09	-0.00117		3750.09	-0.00131		3750.09	-0.01786		3750.09	-0.01786
3749.61	0.0006		3749.61	-0.00083		3749.61	-0.01619		3749.61	-0.01619
3749.13	-0.00106		3749.13	-0.00066		3749.13	-0.01574		3749.13	-0.01574
3748.65	-0.00247		3748.65	-0.00165		3748.65	-0.01756		3748.65	-0.01756
3748.17	-0.00234		3748.17	-0.00236		3748.17	-0.01793		3748.17	-0.01793
3747.68	-0.00241		3747.68	-0.00241		3747.68	-0.01746		3747.68	-0.01746
3747.2	-0.00267		3747.2	-0.00205		3747.2	-0.01709		3747.2	-0.01709
3746.72	-0.00279		3746.72	-0.00188		3746.72	-0.01731		3746.72	-0.01731
3746.24	-0.00249		3746.24	-0.00197		3746.24	-0.0177		3746.24	-0.0177
3745.75	-0.00173		3745.75	-0.0023		3745.75	-0.01778		3745.75	-0.01778
3745.27	0.00026		3745.27	-0.00265		3745.27	-0.01725		3745.27	-0.01725
3744.79	0.00298		3744.79	-0.00217		3744.79	-0.01701		3744.79	-0.01701
3744.31	0.00147		3744.31	-0.00169		3744.31	-0.0167		3744.31	-0.0167
3743.83	-0.0014		3743.83	-0.00165		3743.83	-0.01604		3743.83	-0.01604
3743.34	-0.00249		3743.34	-0.00147		3743.34	-0.01714		3743.34	-0.01714
3742.86	-0.00244		3742.86	-0.0018		3742.86	-0.01787		3742.86	-0.01787
3742.38	-0.00216		3742.38	-0.00198		3742.38	-0.01815		3742.38	-0.01815
3741.9	-0.00194		3741.9	-0.00192		3741.9	-0.01803		3741.9	-0.01803
3741.42	-0.0017		3741.42	-0.00188		3741.42	-0.01742		3741.42	-0.01742
3740.93	-0.00198		3740.93	-0.00195		3740.93	-0.01713		3740.93	-0.01713
3740.45	-0.00239		3740.45	-0.00232		3740.45	-0.01728		3740.45	-0.01728
3739.97	-0.00287		3739.97	-0.0025		3739.97	-0.01715		3739.97	-0.01715
3739.49	-0.00309		3739.49	-0.00243		3739.49	-0.01688		3739.49	-0.01688
3739	-0.00281		3739	-0.00241		3739	-0.01685		3739	-0.01685
3738.52	-0.00253		3738.52	-0.00239		3738.52	-0.01686		3738.52	-0.01686
3738.04	-0.00235		3738.04	-0.0021		3738.04	-0.0173		3738.04	-0.0173
3737.56	-0.00169		3737.56	-0.00166		3737.56	-0.01781		3737.56	-0.01781
3737.08	-0.00059		3737.08	-0.00159		3737.08	-0.0169		3737.08	-0.0169
3736.59	-0.00089		3736.59	-0.00181		3736.59	-0.0161		3736.59	-0.0161
3736.11	-0.00174		3736.11	-0.00222		3736.11	-0.01655		3736.11	-0.01655
3735.63	-0.00137		3735.63	-0.00253		3735.63	-0.01659		3735.63	-0.01659
3735.15	-0.00077		3735.15	-0.00211		3735.15	-0.01657		3735.15	-0.01657
3734.67	-0.00112		3734.67	-0.00196		3734.67	-0.0167		3734.67	-0.0167
3734.18	-0.00225		3734.18	-0.00252		3734.18	-0.01694		3734.18	-0.01694
3733.7	-0.00269		3733.7	-0.0025		3733.7	-0.01736		3733.7	-0.01736
3733.22	-0.0026		3733.22	-0.00225		3733.22	-0.01774		3733.22	-0.01774
3732.74	-0.00173		3732.74	-0.00204		3732.74	-0.01743		3732.74	-0.01743
3732.25	-0.00096		3732.25	-0.00146		3732.25	-0.01642		3732.25	-0.01642
3731.77	-0.00218		3731.77	-0.00139		3731.77	-0.01623		3731.77	-0.01623
3731.29	-0.00279		3731.29	-0.00184		3731.29	-0.01679		3731.29	-0.01679
3730.81	-0.00292		3730.81	-0.00208		3730.81	-0.01696		3730.81	-0.01696
3730.33	-0.00277		3730.33	-0.00211		3730.33	-0.01709		3730.33	-0.01709
3729.84	-0.00246		3729.84	-0.00234		3729.84	-0.01703		3729.84	-0.01703
3729.36	-0.00268		3729.36	-0.00287		3729.36	-0.01732		3729.36	-0.01732
3728.88	-0.00274		3728.88	-0.00289		3728.88	-0.0174		3728.88	-0.0174
3728.4	-0.00267		3728.4	-0.00266		3728.4	-0.01701		3728.4	-0.01701
3727.92	-0.00248		3727.92	-0.00243		3727.92	-0.01694		3727.92	-0.01694
3727.43	-0.00227		3727.43	-0.00181		3727.43	-0.01673		3727.43	-0.01673
3726.95	-0.00211		3726.95	-0.00126		3726.95	-0.01652		3726.95	-0.01652
3726.47	-0.00186		3726.47	-0.00116		3726.47	-0.01668		3726.47	-0.01668
3725.99	-0.00192		3725.99	-0.00164		3725.99	-0.0167		3725.99	-0.0167
3725.5	-0.00207		3725.5	-0.00195		3725.5	-0.01661		3725.5	-0.01661
3725.02	-0.00228		3725.02	-0.00187		3725.02	-0.01673		3725.02	-0.01673
3724.54	-0.00248		3724.54	-0.00217		3724.54	-0.01708		3724.54	-0.01708
3724.06	-0.00266		3724.06	-0.0023		3724.06	-0.01736		3724.06	-0.01736
3723.58	-0.00259		3723.58	-0.00232		3723.58	-0.01762		3723.58	-0.01762
3723.09	-0.00212		3723.09	-0.00273		3723.09	-0.01774		3723.09	-0.01774
3722.61	-0.00177		3722.61	-0.00276		3722.61	-0.01696		3722.61	-0.01696
3722.13	-0.00179		3722.13	-0.00215		3722.13	-0.01591		3722.13	-0.01591
3721.65	-0.00223		3721.65	-0.00169		3721.65	-0.0162		3721.65	-0.0162
3721.17	-0.00265		3721.17	-0.0018		3721.17	-0.01707		3721.17	-0.01707
3720.68	-0.00271		3720.68	-0.00198		3720.68	-0.01736		3720.68	-0.01736
3720.2	-0.0027		3720.2	-0.00199		3720.2	-0.01715		3720.2	-0.01715
3719.72	-0.00246		3719.72	-0.00216		3719.72	-0.01702		3719.72	-0.01702
3719.24	-0.00214		3719.24	-0.00221		3719.24	-0.01706		3719.24	-0.01706
3718.75	-0.00229		3718.75	-0.00215		3718.75	-0.01717		3718.75	-0.01717
3718.27	-0.00285		3718.27	-0.00245		3718.27	-0.01726		3718.27	-0.01726
3717.79	-0.00302		3717.79	-0.00272		3717.79	-0.01735		3717.79	-0.01735
3717.31	-0.00278		3717.31	-0.00275		3717.31	-0.01733		3717.31	-0.01733
3716.83	-0.00262		3716.83	-0.00274		3716.83	-0.01738		3716.83	-0.01738
3716.34	-0.00259		3716.34	-0.00263		3716.34	-0.01758		3716.34	-0.01758
3715.86	-0.00261		3715.86	-0.00256		3715.86	-0.01755		3715.86	-0.01755
3715.38	-0.0026		3715.38	-0.00239		3715.38	-0.01752		3715.38	-0.01752
3714.9	-0.00269		3714.9	-0.00198		3714.9	-0.01758		3714.9	-0.01758
3714.42	-0.00298		3714.42	-0.00185		3714.42	-0.01741		3714.42	-0.01741
3713.93	-0.00293		3713.93	-0.00212		3713.93	-0.01772		3713.93	-0.01772
3713.45	-0.00243		3713.45	-0.00222		3713.45	-0.018		3713.45	-0.018
3712.97	-0.00139		3712.97	-0.00187		3712.97	-0.01761		3712.97	-0.01761
3712.49	-0.00025		3712.49	-0.00148		3712.49	-0.0168		3712.49	-0.0168
3712	-0.00122		3712	-0.00122		3712	-0.01627		3712	-0.01627
3711.52	-0.00279		3711.52	-0.00136		3711.52	-0.0167		3711.52	-0.0167
3711.04	-0.00286		3711.04	-0.00192		3711.04	-0.01729		3711.04	-0.01729
3710.56	-0.00246		3710.56	-0.00208		3710.56	-0.01753		3710.56	-0.01753
3710.08	-0.00192		3710.08	-0.00194		3710.08	-0.01736		3710.08	-0.01736
3709.59	-0.00151		3709.59	-0.00189		3709.59	-0.01676		3709.59	-0.01676
3709.11	-0.00178		3709.11	-0.00182		3709.11	-0.0165		3709.11	-0.0165
3708.63	-0.00248		3708.63	-0.00174		3708.63	-0.01683		3708.63	-0.01683
3708.15	-0.00279		3708.15	-0.00153		3708.15	-0.01702		3708.15	-0.01702
3707.67	-0.00274		3707.67	-0.00182		3707.67	-0.01703		3707.67	-0.01703
3707.18	-0.00269		3707.18	-0.00212		3707.18	-0.01716		3707.18	-0.01716
3706.7	-0.0026		3706.7	-0.00199		3706.7	-0.01732		3706.7	-0.01732
3706.22	-0.0029		3706.22	-0.00228		3706.22	-0.0176		3706.22	-0.0176
3705.74	-0.0033		3705.74	-0.00251		3705.74	-0.01782		3705.74	-0.01782
3705.25	-0.00319		3705.25	-0.00242		3705.25	-0.01724		3705.25	-0.01724
3704.77	-0.00296		3704.77	-0.00228		3704.77	-0.0168		3704.77	-0.0168
3704.29	-0.0029		3704.29	-0.00221		3704.29	-0.01722		3704.29	-0.01722
3703.81	-0.00276		3703.81	-0.00233		3703.81	-0.01727		3703.81	-0.01727
3703.33	-0.00273		3703.33	-0.0024		3703.33	-0.01686		3703.33	-0.01686
3702.84	-0.00262		3702.84	-0.00244		3702.84	-0.01715		3702.84	-0.01715
3702.36	-0.00169		3702.36	-0.00229		3702.36	-0.01752		3702.36	-0.01752
3701.88	-0.00107		3701.88	-0.00193		3701.88	-0.01689		3701.88	-0.01689
3701.4	-0.00229		3701.4	-0.00183		3701.4	-0.01602		3701.4	-0.01602
3700.92	-0.00325		3700.92	-0.00195		3700.92	-0.01669		3700.92	-0.01669
3700.43	-0.00316		3700.43	-0.0022		3700.43	-0.01708		3700.43	-0.01708
3699.95	-0.0029		3699.95	-0.00253		3699.95	-0.01675		3699.95	-0.01675
3699.47	-0.00292		3699.47	-0.00264		3699.47	-0.01666		3699.47	-0.01666
3698.99	-0.00278		3698.99	-0.00257		3698.99	-0.01695		3698.99	-0.01695
3698.5	-0.00249		3698.5	-0.00251		3698.5	-0.0171		3698.5	-0.0171
3698.02	-0.00263		3698.02	-0.00225		3698.02	-0.01686		3698.02	-0.01686
3697.54	-0.00304		3697.54	-0.00204		3697.54	-0.01675		3697.54	-0.01675
3697.06	-0.00307		3697.06	-0.00242		3697.06	-0.017		3697.06	-0.017
3696.58	-0.00284		3696.58	-0.00272		3696.58	-0.01681		3696.58	-0.01681
3696.09	-0.00289		3696.09	-0.00249		3696.09	-0.0166		3696.09	-0.0166
3695.61	-0.00304		3695.61	-0.00219		3695.61	-0.01726		3695.61	-0.01726
3695.13	-0.00319		3695.13	-0.00202		3695.13	-0.01791		3695.13	-0.01791
3694.65	-0.00322		3694.65	-0.00197		3694.65	-0.01788		3694.65	-0.01788
3694.17	-0.00278		3694.17	-0.00191		3694.17	-0.01753		3694.17	-0.01753
3693.68	-0.00254		3693.68	-0.00175		3693.68	-0.01729		3693.68	-0.01729
3693.2	-0.00256		3693.2	-0.00172		3693.2	-0.01717		3693.2	-0.01717
3692.72	-0.00249		3692.72	-0.00195		3692.72	-0.01697		3692.72	-0.01697
3692.24	-0.00238		3692.24	-0.00247		3692.24	-0.01698		3692.24	-0.01698
3691.75	-0.00188		3691.75	-0.0027		3691.75	-0.01685		3691.75	-0.01685
3691.27	-0.00156		3691.27	-0.0019		3691.27	-0.01638		3691.27	-0.01638
3690.79	-0.0022		3690.79	-0.00112		3690.79	-0.01681		3690.79	-0.01681
3690.31	-0.00277		3690.31	-0.00143		3690.31	-0.01791		3690.31	-0.01791
3689.83	-0.00293		3689.83	-0.00201		3689.83	-0.01818		3689.83	-0.01818
3689.34	-0.00235		3689.34	-0.00226		3689.34	-0.01797		3689.34	-0.01797
3688.86	-0.00067		3688.86	-0.00215		3688.86	-0.01728		3688.86	-0.01728
3688.38	-0.00017		3688.38	-0.00224		3688.38	-0.01699		3688.38	-0.01699
3687.9	-0.00212		3687.9	-0.0023		3687.9	-0.01757		3687.9	-0.01757
3687.42	-0.00267		3687.42	-0.00203		3687.42	-0.0181		3687.42	-0.0181
3686.93	-0.00295		3686.93	-0.00177		3686.93	-0.01798		3686.93	-0.01798
3686.45	-0.00343		3686.45	-0.00169		3686.45	-0.01793		3686.45	-0.01793
3685.97	-0.00342		3685.97	-0.00202		3685.97	-0.01771		3685.97	-0.01771
3685.49	-0.00318		3685.49	-0.00228		3685.49	-0.01734		3685.49	-0.01734
3685	-0.00307		3685	-0.00222		3685	-0.01726		3685	-0.01726
3684.52	-0.00308		3684.52	-0.00208		3684.52	-0.01746		3684.52	-0.01746
3684.04	-0.00321		3684.04	-0.00198		3684.04	-0.01774		3684.04	-0.01774
3683.56	-0.00334		3683.56	-0.00209		3683.56	-0.01774		3683.56	-0.01774
3683.08	-0.00323		3683.08	-0.00221		3683.08	-0.01743		3683.08	-0.01743
3682.59	-0.00315		3682.59	-0.00231		3682.59	-0.01763		3682.59	-0.01763
3682.11	-0.00317		3682.11	-0.00245		3682.11	-0.01797		3682.11	-0.01797
3681.63	-0.00292		3681.63	-0.00258		3681.63	-0.01789		3681.63	-0.01789
3681.15	-0.00272		3681.15	-0.00282		3681.15	-0.01758		3681.15	-0.01758
3680.67	-0.00259		3680.67	-0.00298		3680.67	-0.01738		3680.67	-0.01738
3680.18	-0.00225		3680.18	-0.00274		3680.18	-0.01759		3680.18	-0.01759
3679.7	-0.00215		3679.7	-0.00235		3679.7	-0.0176		3679.7	-0.0176
3679.22	-0.00263		3679.22	-0.00229		3679.22	-0.01722		3679.22	-0.01722
3678.74	-0.00312		3678.74	-0.00249		3678.74	-0.01715		3678.74	-0.01715
3678.25	-0.00311		3678.25	-0.00254		3678.25	-0.0176		3678.25	-0.0176
3677.77	-0.00289		3677.77	-0.00237		3677.77	-0.01792		3677.77	-0.01792
3677.29	-0.00257		3677.29	-0.00219		3677.29	-0.01806		3677.29	-0.01806
3676.81	-0.00174		3676.81	-0.00194		3676.81	-0.01828		3676.81	-0.01828
3676.33	-0.00056		3676.33	-0.00148		3676.33	-0.01814		3676.33	-0.01814
3675.84	-0.00035		3675.84	-0.00111		3675.84	-0.01862		3675.84	-0.01862
3675.36	-0.00062		3675.36	-0.00136		3675.36	-0.01858		3675.36	-0.01858
3674.88	-0.00067		3674.88	-0.00162		3674.88	-0.01747		3674.88	-0.01747
3674.4	-0.00178		3674.4	-0.00157		3674.4	-0.01684		3674.4	-0.01684
3673.92	-0.00249		3673.92	-0.00184		3673.92	-0.01736		3673.92	-0.01736
3673.43	-0.00268		3673.43	-0.00223		3673.43	-0.01796		3673.43	-0.01796
3672.95	-0.00293		3672.95	-0.00215		3672.95	-0.01813		3672.95	-0.01813
3672.47	-0.00308		3672.47	-0.00212		3672.47	-0.0177		3672.47	-0.0177
3671.99	-0.00318		3671.99	-0.00216		3671.99	-0.01778		3671.99	-0.01778
3671.5	-0.00223		3671.5	-0.00196		3671.5	-0.01763		3671.5	-0.01763
3671.02	-0.00058		3671.02	-0.0015		3671.02	-0.01721		3671.02	-0.01721
3670.54	-0.0011		3670.54	-0.00091		3670.54	-0.01778		3670.54	-0.01778
3670.06	-0.00232		3670.06	-0.00125		3670.06	-0.01846		3670.06	-0.01846
3669.58	-0.00248		3669.58	-0.00156		3669.58	-0.01856		3669.58	-0.01856
3669.09	-0.00208		3669.09	-0.00133		3669.09	-0.01767		3669.09	-0.01767
3668.61	-0.00189		3668.61	-0.00099		3668.61	-0.01686		3668.61	-0.01686
3668.13	-0.00272		3668.13	-0.00116		3668.13	-0.01698		3668.13	-0.01698
3667.65	-0.00321		3667.65	-0.00165		3667.65	-0.01754		3667.65	-0.01754
3667.17	-0.00319		3667.17	-0.00224		3667.17	-0.01771		3667.17	-0.01771
3666.68	-0.00301		3666.68	-0.00254		3666.68	-0.01791		3666.68	-0.01791
3666.2	-0.00303		3666.2	-0.00221		3666.2	-0.01831		3666.2	-0.01831
3665.72	-0.00303		3665.72	-0.00158		3665.72	-0.01822		3665.72	-0.01822
3665.24	-0.0027		3665.24	-0.00114		3665.24	-0.01794		3665.24	-0.01794
3664.75	-0.00269		3664.75	-0.00147		3664.75	-0.018		3664.75	-0.018
3664.27	-0.00282		3664.27	-0.00216		3664.27	-0.01796		3664.27	-0.01796
3663.79	-0.00278		3663.79	-0.00227		3663.79	-0.01775		3663.79	-0.01775
3663.31	-0.00286		3663.31	-0.0021		3663.31	-0.01773		3663.31	-0.01773
3662.83	-0.00307		3662.83	-0.00192		3662.83	-0.01768		3662.83	-0.01768
3662.34	-0.00326		3662.34	-0.00212		3662.34	-0.01744		3662.34	-0.01744
3661.86	-0.00322		3661.86	-0.00261		3661.86	-0.01738		3661.86	-0.01738
3661.38	-0.00323		3661.38	-0.00251		3661.38	-0.01739		3661.38	-0.01739
3660.9	-0.00337		3660.9	-0.00224		3660.9	-0.01771		3660.9	-0.01771
3660.42	-0.00331		3660.42	-0.00221		3660.42	-0.0183		3660.42	-0.0183
3659.93	-0.00314		3659.93	-0.0022		3659.93	-0.01829		3659.93	-0.01829
3659.45	-0.00321		3659.45	-0.00233		3659.45	-0.01778		3659.45	-0.01778
3658.97	-0.00359		3658.97	-0.00245		3658.97	-0.01748		3658.97	-0.01748
3658.49	-0.00374		3658.49	-0.00238		3658.49	-0.01769		3658.49	-0.01769
3658	-0.00341		3658	-0.00216		3658	-0.01789		3658	-0.01789
3657.52	-0.00311		3657.52	-0.00201		3657.52	-0.01799		3657.52	-0.01799
3657.04	-0.00232		3657.04	-0.00197		3657.04	-0.01826		3657.04	-0.01826
3656.56	-0.00098		3656.56	-0.0017		3656.56	-0.01802		3656.56	-0.01802
3656.08	-0.00135		3656.08	-0.00165		3656.08	-0.0173		3656.08	-0.0173
3655.59	-0.00261		3655.59	-0.00201		3655.59	-0.01729		3655.59	-0.01729
3655.11	-0.00296		3655.11	-0.00206		3655.11	-0.01742		3655.11	-0.01742
3654.63	-0.00295		3654.63	-0.00201		3654.63	-0.01747		3654.63	-0.01747
3654.15	-0.00285		3654.15	-0.00204		3654.15	-0.01764		3654.15	-0.01764
3653.67	-0.00303		3653.67	-0.00198		3653.67	-0.01789		3653.67	-0.01789
3653.18	-0.0031		3653.18	-0.00208		3653.18	-0.01822		3653.18	-0.01822
3652.7	-0.00309		3652.7	-0.00226		3652.7	-0.01824		3652.7	-0.01824
3652.22	-0.00288		3652.22	-0.00206		3652.22	-0.01783		3652.22	-0.01783
3651.74	-0.0019		3651.74	-0.00161		3651.74	-0.01742		3651.74	-0.01742
3651.25	-0.00112		3651.25	-0.00114		3651.25	-0.01757		3651.25	-0.01757
3650.77	-0.0016		3650.77	-0.00107		3650.77	-0.0174		3650.77	-0.0174
3650.29	-0.00213		3650.29	-0.00121		3650.29	-0.01748		3650.29	-0.01748
3649.81	-0.00143		3649.81	-0.00111		3649.81	-0.01776		3649.81	-0.01776
3649.33	-0.00084		3649.33	-0.0012		3649.33	-0.01761		3649.33	-0.01761
3648.84	-0.00216		3648.84	-0.00192		3648.84	-0.01798		3648.84	-0.01798
3648.36	-0.00266		3648.36	-0.00235		3648.36	-0.01865		3648.36	-0.01865
3647.88	-0.00205		3647.88	-0.00208		3647.88	-0.0182		3647.88	-0.0182
3647.4	-0.0017		3647.4	-0.0012		3647.4	-0.01753		3647.4	-0.01753
3646.92	-0.00255		3646.92	-0.00089		3646.92	-0.01723		3646.92	-0.01723
3646.43	-0.00325		3646.43	-0.00138		3646.43	-0.01769		3646.43	-0.01769
3645.95	-0.00335		3645.95	-0.0019		3645.95	-0.01792		3645.95	-0.01792
3645.47	-0.00348		3645.47	-0.00234		3645.47	-0.01792		3645.47	-0.01792
3644.99	-0.00345		3644.99	-0.00239		3644.99	-0.01773		3644.99	-0.01773
3644.5	-0.00328		3644.5	-0.00228		3644.5	-0.01747		3644.5	-0.01747
3644.02	-0.00316		3644.02	-0.00247		3644.02	-0.01766		3644.02	-0.01766
3643.54	-0.00327		3643.54	-0.00247		3643.54	-0.01793		3643.54	-0.01793
3643.06	-0.00346		3643.06	-0.00231		3643.06	-0.01795		3643.06	-0.01795
3642.58	-0.00351		3642.58	-0.00237		3642.58	-0.01761		3642.58	-0.01761
3642.09	-0.00345		3642.09	-0.00231		3642.09	-0.01748		3642.09	-0.01748
3641.61	-0.00301		3641.61	-0.0023		3641.61	-0.01773		3641.61	-0.01773
3641.13	-0.00271		3641.13	-0.00247		3641.13	-0.01768		3641.13	-0.01768
3640.65	-0.00261		3640.65	-0.00259		3640.65	-0.01746		3640.65	-0.01746
3640.17	-0.00259		3640.17	-0.00257		3640.17	-0.01733		3640.17	-0.01733
3639.68	-0.00301		3639.68	-0.00247		3639.68	-0.01764		3639.68	-0.01764
3639.2	-0.00339		3639.2	-0.00241		3639.2	-0.01774		3639.2	-0.01774
3638.72	-0.00332		3638.72	-0.00248		3638.72	-0.01733		3638.72	-0.01733
3638.24	-0.00291		3638.24	-0.00234		3638.24	-0.01747		3638.24	-0.01747
3637.75	-0.00285		3637.75	-0.00182		3637.75	-0.01768		3637.75	-0.01768
3637.27	-0.00315		3637.27	-0.00191		3637.27	-0.01754		3637.27	-0.01754
3636.79	-0.0033		3636.79	-0.00234		3636.79	-0.01745		3636.79	-0.01745
3636.31	-0.00337		3636.31	-0.00237		3636.31	-0.01747		3636.31	-0.01747
3635.83	-0.00341		3635.83	-0.00246		3635.83	-0.01762		3635.83	-0.01762
3635.34	-0.00364		3635.34	-0.00255		3635.34	-0.01773		3635.34	-0.01773
3634.86	-0.00349		3634.86	-0.00255		3634.86	-0.01767		3634.86	-0.01767
3634.38	-0.0026		3634.38	-0.00227		3634.38	-0.01731		3634.38	-0.01731
3633.9	-0.00209		3633.9	-0.00199		3633.9	-0.01707		3633.9	-0.01707
3633.42	-0.00255		3633.42	-0.00254		3633.42	-0.01691		3633.42	-0.01691
3632.93	-0.00307		3632.93	-0.00306		3632.93	-0.01714		3632.93	-0.01714
3632.45	-0.00312		3632.45	-0.00315		3632.45	-0.01753		3632.45	-0.01753
3631.97	-0.00308		3631.97	-0.00305		3631.97	-0.01743		3631.97	-0.01743
3631.49	-0.00303		3631.49	-0.00276		3631.49	-0.01734		3631.49	-0.01734
3631	-0.00274		3631	-0.00248		3631	-0.01746		3631	-0.01746
3630.52	-0.00211		3630.52	-0.00204		3630.52	-0.0176		3630.52	-0.0176
3630.04	-0.00071		3630.04	-0.00134		3630.04	-0.0171		3630.04	-0.0171
3629.56	0.00023		3629.56	-0.00094		3629.56	-0.01625		3629.56	-0.01625
3629.08	-0.00058		3629.08	-0.0017		3629.08	-0.01685		3629.08	-0.01685
3628.59	-0.00062		3628.59	-0.00206		3628.59	-0.01717		3628.59	-0.01717
3628.11	-0.00112		3628.11	-0.00189		3628.11	-0.01616		3628.11	-0.01616
3627.63	-0.00238		3627.63	-0.00207		3627.63	-0.0166		3627.63	-0.0166
3627.15	-0.00261		3627.15	-0.00237		3627.15	-0.0171		3627.15	-0.0171
3626.67	-0.0026		3626.67	-0.00253		3626.67	-0.01697		3626.67	-0.01697
3626.18	-0.00282		3626.18	-0.00237		3626.18	-0.01733		3626.18	-0.01733
3625.7	-0.00278		3625.7	-0.00234		3625.7	-0.01766		3625.7	-0.01766
3625.22	-0.00289		3625.22	-0.00253		3625.22	-0.01767		3625.22	-0.01767
3624.74	-0.00332		3624.74	-0.00232		3624.74	-0.01785		3624.74	-0.01785
3624.25	-0.00331		3624.25	-0.00209		3624.25	-0.01789		3624.25	-0.01789
3623.77	-0.00323		3623.77	-0.00214		3623.77	-0.01787		3623.77	-0.01787
3623.29	-0.0034		3623.29	-0.00214		3623.29	-0.01809		3623.29	-0.01809
3622.81	-0.00326		3622.81	-0.00216		3622.81	-0.01768		3622.81	-0.01768
3622.33	-0.00313		3622.33	-0.0022		3622.33	-0.01734		3622.33	-0.01734
3621.84	-0.00299		3621.84	-0.00206		3621.84	-0.01758		3621.84	-0.01758
3621.36	-0.00269		3621.36	-0.002		3621.36	-0.01729		3621.36	-0.01729
3620.88	-0.00292		3620.88	-0.00229		3620.88	-0.017		3620.88	-0.017
3620.4	-0.00284		3620.4	-0.00277		3620.4	-0.01712		3620.4	-0.01712
3619.92	-0.00195		3619.92	-0.00285		3619.92	-0.01683		3619.92	-0.01683
3619.43	-0.00201		3619.43	-0.00228		3619.43	-0.01655		3619.43	-0.01655
3618.95	-0.00271		3618.95	-0.00189		3618.95	-0.01698		3618.95	-0.01698
3618.47	-0.00239		3618.47	-0.00179		3618.47	-0.01726		3618.47	-0.01726
3617.99	-0.00192		3617.99	-0.00181		3617.99	-0.01722		3617.99	-0.01722
3617.5	-0.00248		3617.5	-0.00179		3617.5	-0.0171		3617.5	-0.0171
3617.02	-0.00313		3617.02	-0.00218		3617.02	-0.01692		3617.02	-0.01692
3616.54	-0.00309		3616.54	-0.00274		3616.54	-0.01709		3616.54	-0.01709
3616.06	-0.00287		3616.06	-0.00262		3616.06	-0.01741		3616.06	-0.01741
3615.58	-0.00251		3615.58	-0.00252		3615.58	-0.01761		3615.58	-0.01761
3615.09	-0.00203		3615.09	-0.00263		3615.09	-0.01758		3615.09	-0.01758
3614.61	-0.00198		3614.61	-0.00244		3614.61	-0.01736		3614.61	-0.01736
3614.13	-0.00254		3614.13	-0.00229		3614.13	-0.01705		3614.13	-0.01705
3613.65	-0.00287		3613.65	-0.00236		3613.65	-0.01721		3613.65	-0.01721
3613.17	-0.00214		3613.17	-0.00239		3613.17	-0.01732		3613.17	-0.01732
3612.68	-0.00159		3612.68	-0.00207		3612.68	-0.01706		3612.68	-0.01706
3612.2	-0.00247		3612.2	-0.00211		3612.2	-0.01701		3612.2	-0.01701
3611.72	-0.00321		3611.72	-0.00245		3611.72	-0.01748		3611.72	-0.01748
3611.24	-0.00333		3611.24	-0.00262		3611.24	-0.01768		3611.24	-0.01768
3610.75	-0.00326		3610.75	-0.00287		3610.75	-0.01765		3610.75	-0.01765
3610.27	-0.00307		3610.27	-0.00291		3610.27	-0.0176		3610.27	-0.0176
3609.79	-0.00217		3609.79	-0.00229		3609.79	-0.0173		3609.79	-0.0173
3609.31	-0.00146		3609.31	-0.00153		3609.31	-0.01666		3609.31	-0.01666
3608.83	-0.00268		3608.83	-0.00201		3608.83	-0.0166		3608.83	-0.0166
3608.34	-0.00349		3608.34	-0.0026		3608.34	-0.01721		3608.34	-0.01721
3607.86	-0.00337		3607.86	-0.00257		3607.86	-0.01729		3607.86	-0.01729
3607.38	-0.00278		3607.38	-0.0023		3607.38	-0.01729		3607.38	-0.01729
3606.9	-0.00235		3606.9	-0.00205		3606.9	-0.01697		3606.9	-0.01697
3606.42	-0.00276		3606.42	-0.00218		3606.42	-0.01683		3606.42	-0.01683
3605.93	-0.00306		3605.93	-0.00218		3605.93	-0.01745		3605.93	-0.01745
3605.45	-0.00306		3605.45	-0.00227		3605.45	-0.01768		3605.45	-0.01768
3604.97	-0.00305		3604.97	-0.00237		3604.97	-0.01748		3604.97	-0.01748
3604.49	-0.00318		3604.49	-0.00215		3604.49	-0.01757		3604.49	-0.01757
3604	-0.00327		3604	-0.00223		3604	-0.01795		3604	-0.01795
3603.52	-0.00297		3603.52	-0.00239		3603.52	-0.0178		3603.52	-0.0178
3603.04	-0.00279		3603.04	-0.00225		3603.04	-0.01746		3603.04	-0.01746
3602.56	-0.00292		3602.56	-0.0019		3602.56	-0.01741		3602.56	-0.01741
3602.08	-0.00293		3602.08	-0.00196		3602.08	-0.01741		3602.08	-0.01741
3601.59	-0.00291		3601.59	-0.00249		3601.59	-0.01735		3601.59	-0.01735
3601.11	-0.00308		3601.11	-0.00278		3601.11	-0.01747		3601.11	-0.01747
3600.63	-0.00319		3600.63	-0.00281		3600.63	-0.01798		3600.63	-0.01798
3600.15	-0.0031		3600.15	-0.00274		3600.15	-0.018		3600.15	-0.018
3599.67	-0.00303		3599.67	-0.00262		3599.67	-0.01719		3599.67	-0.01719
3599.18	-0.00306		3599.18	-0.00255		3599.18	-0.0171		3599.18	-0.0171
3598.7	-0.00295		3598.7	-0.00241		3598.7	-0.01741		3598.7	-0.01741
3598.22	-0.00285		3598.22	-0.0024		3598.22	-0.01696		3598.22	-0.01696
3597.74	-0.00301		3597.74	-0.00264		3597.74	-0.01666		3597.74	-0.01666
3597.25	-0.0029		3597.25	-0.00285		3597.25	-0.01703		3597.25	-0.01703
3596.77	-0.00258		3596.77	-0.00281		3596.77	-0.01704		3596.77	-0.01704
3596.29	-0.00241		3596.29	-0.00232		3596.29	-0.0168		3596.29	-0.0168
3595.81	-0.00208		3595.81	-0.00172		3595.81	-0.01675		3595.81	-0.01675
3595.33	-0.00203		3595.33	-0.00178		3595.33	-0.01677		3595.33	-0.01677
3594.84	-0.00253		3594.84	-0.00222		3594.84	-0.01682		3594.84	-0.01682
3594.36	-0.00302		3594.36	-0.00255		3594.36	-0.01692		3594.36	-0.01692
3593.88	-0.00301		3593.88	-0.00261		3593.88	-0.01706		3593.88	-0.01706
3593.4	-0.00255		3593.4	-0.00248		3593.4	-0.01685		3593.4	-0.01685
3592.92	-0.00248		3592.92	-0.00256		3592.92	-0.01656		3592.92	-0.01656
3592.43	-0.00313		3592.43	-0.00247		3592.43	-0.01691		3592.43	-0.01691
3591.95	-0.00362		3591.95	-0.00237		3591.95	-0.01758		3591.95	-0.01758
3591.47	-0.0036		3591.47	-0.00248		3591.47	-0.01781		3591.47	-0.01781
3590.99	-0.00367		3590.99	-0.00254		3590.99	-0.0176		3590.99	-0.0176
3590.5	-0.00374		3590.5	-0.00262		3590.5	-0.01751		3590.5	-0.01751
3590.02	-0.00343		3590.02	-0.00253		3590.02	-0.01762		3590.02	-0.01762
3589.54	-0.00274		3589.54	-0.00231		3589.54	-0.01733		3589.54	-0.01733
3589.06	-0.00171		3589.06	-0.00209		3589.06	-0.01663		3589.06	-0.01663
3588.58	-0.00165		3588.58	-0.00242		3588.58	-0.01643		3588.58	-0.01643
3588.09	-0.00233		3588.09	-0.00297		3588.09	-0.01681		3588.09	-0.01681
3587.61	-0.00228		3587.61	-0.00278		3587.61	-0.01711		3587.61	-0.01711
3587.13	-0.00209		3587.13	-0.00235		3587.13	-0.01687		3587.13	-0.01687
3586.65	-0.00203		3586.65	-0.00201		3586.65	-0.01662		3586.65	-0.01662
3586.17	-0.00241		3586.17	-0.00202		3586.17	-0.01684		3586.17	-0.01684
3585.68	-0.00267		3585.68	-0.00232		3585.68	-0.01739		3585.68	-0.01739
3585.2	-0.00274		3585.2	-0.00252		3585.2	-0.01731		3585.2	-0.01731
3584.72	-0.00323		3584.72	-0.00262		3584.72	-0.01722		3584.72	-0.01722
3584.24	-0.00327		3584.24	-0.00282		3584.24	-0.01735		3584.24	-0.01735
3583.75	-0.00274		3583.75	-0.00301		3583.75	-0.01737		3583.75	-0.01737
3583.27	-0.00253		3583.27	-0.00266		3583.27	-0.01745		3583.27	-0.01745
3582.79	-0.00276		3582.79	-0.00232		3582.79	-0.01747		3582.79	-0.01747
3582.31	-0.00306		3582.31	-0.00242		3582.31	-0.01725		3582.31	-0.01725
3581.83	-0.00313		3581.83	-0.00248		3581.83	-0.01711		3581.83	-0.01711
3581.34	-0.00319		3581.34	-0.00234		3581.34	-0.0172		3581.34	-0.0172
3580.86	-0.00327		3580.86	-0.0022		3580.86	-0.0174		3580.86	-0.0174
3580.38	-0.00325		3580.38	-0.00226		3580.38	-0.01773		3580.38	-0.01773
3579.9	-0.00318		3579.9	-0.00221		3579.9	-0.01774		3579.9	-0.01774
3579.42	-0.003		3579.42	-0.00224		3579.42	-0.01741		3579.42	-0.01741
3578.93	-0.00285		3578.93	-0.00259		3578.93	-0.01727		3578.93	-0.01727
3578.45	-0.00296		3578.45	-0.00294		3578.45	-0.01728		3578.45	-0.01728
3577.97	-0.00307		3577.97	-0.00299		3577.97	-0.01731		3577.97	-0.01731
3577.49	-0.00289		3577.49	-0.00284		3577.49	-0.01729		3577.49	-0.01729
3577	-0.00296		3577	-0.00278		3577	-0.01735		3577	-0.01735
3576.52	-0.00311		3576.52	-0.00277		3576.52	-0.01742		3576.52	-0.01742
3576.04	-0.00293		3576.04	-0.00278		3576.04	-0.01742		3576.04	-0.01742
3575.56	-0.00285		3575.56	-0.00269		3575.56	-0.01754		3575.56	-0.01754
3575.08	-0.00278		3575.08	-0.0026		3575.08	-0.0176		3575.08	-0.0176
3574.59	-0.00263		3574.59	-0.00254		3574.59	-0.01767		3574.59	-0.01767
3574.11	-0.00267		3574.11	-0.00221		3574.11	-0.01763		3574.11	-0.01763
3573.63	-0.00276		3573.63	-0.00208		3573.63	-0.01719		3573.63	-0.01719
3573.15	-0.00264		3573.15	-0.00235		3573.15	-0.01678		3573.15	-0.01678
3572.67	-0.00262		3572.67	-0.00265		3572.67	-0.01667		3572.67	-0.01667
3572.18	-0.00295		3572.18	-0.00282		3572.18	-0.01677		3572.18	-0.01677
3571.7	-0.00324		3571.7	-0.00291		3571.7	-0.01713		3571.7	-0.01713
3571.22	-0.00322		3571.22	-0.00273		3571.22	-0.0176		3571.22	-0.0176
3570.74	-0.0028		3570.74	-0.00247		3570.74	-0.01785		3570.74	-0.01785
3570.25	-0.00253		3570.25	-0.00267		3570.25	-0.0179		3570.25	-0.0179
3569.77	-0.00278		3569.77	-0.0027		3569.77	-0.01779		3569.77	-0.01779
3569.29	-0.00272		3569.29	-0.00241		3569.29	-0.0176		3569.29	-0.0176
3568.81	-0.00206		3568.81	-0.00217		3568.81	-0.01722		3568.81	-0.01722
3568.33	-0.00119		3568.33	-0.00198		3568.33	-0.01671		3568.33	-0.01671
3567.84	-0.00146		3567.84	-0.00219		3567.84	-0.01657		3567.84	-0.01657
3567.36	-0.00234		3567.36	-0.00247		3567.36	-0.01689		3567.36	-0.01689
3566.88	-0.00217		3566.88	-0.00254		3566.88	-0.01708		3566.88	-0.01708
3566.4	-0.00172		3566.4	-0.00225		3566.4	-0.01702		3566.4	-0.01702
3565.92	-0.00175		3565.92	-0.00203		3565.92	-0.01693		3565.92	-0.01693
3565.43	-0.00206		3565.43	-0.00226		3565.43	-0.01738		3565.43	-0.01738
3564.95	-0.00255		3564.95	-0.00228		3564.95	-0.01763		3564.95	-0.01763
3564.47	-0.00271		3564.47	-0.00221		3564.47	-0.01729		3564.47	-0.01729
3563.99	-0.0024		3563.99	-0.00204		3563.99	-0.01701		3563.99	-0.01701
3563.5	-0.00229		3563.5	-0.00188		3563.5	-0.01704		3563.5	-0.01704
3563.02	-0.00263		3563.02	-0.00226		3563.02	-0.01737		3563.02	-0.01737
3562.54	-0.0028		3562.54	-0.00279		3562.54	-0.01774		3562.54	-0.01774
3562.06	-0.00261		3562.06	-0.00273		3562.06	-0.01765		3562.06	-0.01765
3561.58	-0.00227		3561.58	-0.00237		3561.58	-0.0174		3561.58	-0.0174
3561.09	-0.00201		3561.09	-0.00243		3561.09	-0.01756		3561.09	-0.01756
3560.61	-0.00219		3560.61	-0.00246		3560.61	-0.0178		3560.61	-0.0178
3560.13	-0.00246		3560.13	-0.00252		3560.13	-0.01788		3560.13	-0.01788
3559.65	-0.00249		3559.65	-0.00282		3559.65	-0.01789		3559.65	-0.01789
3559.17	-0.00257		3559.17	-0.00272		3559.17	-0.01775		3559.17	-0.01775
3558.68	-0.00266		3558.68	-0.00252		3558.68	-0.01767		3558.68	-0.01767
3558.2	-0.00244		3558.2	-0.00243		3558.2	-0.01766		3558.2	-0.01766
3557.72	-0.00217		3557.72	-0.00229		3557.72	-0.01751		3557.72	-0.01751
3557.24	-0.00212		3557.24	-0.00222		3557.24	-0.01742		3557.24	-0.01742
3556.75	-0.00234		3556.75	-0.00228		3556.75	-0.01742		3556.75	-0.01742
3556.27	-0.0027		3556.27	-0.00229		3556.27	-0.0176		3556.27	-0.0176
3555.79	-0.00276		3555.79	-0.00208		3555.79	-0.01777		3555.79	-0.01777
3555.31	-0.00265		3555.31	-0.00209		3555.31	-0.01765		3555.31	-0.01765
3554.83	-0.00238		3554.83	-0.00219		3554.83	-0.01766		3554.83	-0.01766
3554.34	-0.00188		3554.34	-0.002		3554.34	-0.0178		3554.34	-0.0178
3553.86	-0.00184		3553.86	-0.00207		3553.86	-0.01766		3553.86	-0.01766
3553.38	-0.00229		3553.38	-0.0023		3553.38	-0.0175		3553.38	-0.0175
3552.9	-0.00227		3552.9	-0.00221		3552.9	-0.01732		3552.9	-0.01732
3552.42	-0.00202		3552.42	-0.00204		3552.42	-0.01717		3552.42	-0.01717
3551.93	-0.00231		3551.93	-0.0019		3551.93	-0.01738		3551.93	-0.01738
3551.45	-0.00263		3551.45	-0.00198		3551.45	-0.01775		3551.45	-0.01775
3550.97	-0.00262		3550.97	-0.00229		3550.97	-0.01787		3550.97	-0.01787
3550.49	-0.00267		3550.49	-0.00228		3550.49	-0.01765		3550.49	-0.01765
3550.01	-0.00294		3550.01	-0.00193		3550.01	-0.01748		3550.01	-0.01748
3549.52	-0.00318		3549.52	-0.00172		3549.52	-0.01755		3549.52	-0.01755
3549.04	-0.00282		3549.04	-0.00187		3549.04	-0.0177		3549.04	-0.0177
3548.56	-0.00222		3548.56	-0.002		3548.56	-0.01782		3548.56	-0.01782
3548.08	-0.00217		3548.08	-0.00185		3548.08	-0.01783		3548.08	-0.01783
3547.59	-0.00224		3547.59	-0.00176		3547.59	-0.01773		3547.59	-0.01773
3547.11	-0.00219		3547.11	-0.00159		3547.11	-0.01739		3547.11	-0.01739
3546.63	-0.00247		3546.63	-0.00137		3546.63	-0.017		3546.63	-0.017
3546.15	-0.00275		3546.15	-0.0014		3546.15	-0.01702		3546.15	-0.01702
3545.67	-0.00254		3545.67	-0.00124		3545.67	-0.01708		3545.67	-0.01708
3545.18	-0.00213		3545.18	-0.00124		3545.18	-0.01711		3545.18	-0.01711
3544.7	-0.00214		3544.7	-0.00157		3544.7	-0.01716		3544.7	-0.01716
3544.22	-0.00256		3544.22	-0.00148		3544.22	-0.01727		3544.22	-0.01727
3543.74	-0.00294		3543.74	-0.00117		3543.74	-0.0174		3543.74	-0.0174
3543.26	-0.0028		3543.26	-0.00115		3543.26	-0.01733		3543.26	-0.01733
3542.77	-0.00244		3542.77	-0.00113		3542.77	-0.01705		3542.77	-0.01705
3542.29	-0.00264		3542.29	-0.00116		3542.29	-0.01698		3542.29	-0.01698
3541.81	-0.00301		3541.81	-0.00152		3541.81	-0.01704		3541.81	-0.01704
3541.33	-0.003		3541.33	-0.00173		3541.33	-0.01704		3541.33	-0.01704
3540.84	-0.00288		3540.84	-0.00158		3540.84	-0.01725		3540.84	-0.01725
3540.36	-0.00276		3540.36	-0.00119		3540.36	-0.01738		3540.36	-0.01738
3539.88	-0.00282		3539.88	-0.00085		3539.88	-0.01714		3539.88	-0.01714
3539.4	-0.00298		3539.4	-0.00094		3539.4	-0.01712		3539.4	-0.01712
3538.92	-0.00307		3538.92	-0.00101		3538.92	-0.0174		3538.92	-0.0174
3538.43	-0.00315		3538.43	-0.00083		3538.43	-0.01748		3538.43	-0.01748
3537.95	-0.00312		3537.95	-0.00068		3537.95	-0.01738		3537.95	-0.01738
3537.47	-0.00325		3537.47	-0.0008		3537.47	-0.01746		3537.47	-0.01746
3536.99	-0.00331		3536.99	-0.00103		3536.99	-0.0175		3536.99	-0.0175
3536.51	-0.00292		3536.51	-0.00115		3536.51	-0.0172		3536.51	-0.0172
3536.02	-0.00272		3536.02	-0.00141		3536.02	-0.01687		3536.02	-0.01687
3535.54	-0.00287		3535.54	-0.00152		3535.54	-0.01669		3535.54	-0.01669
3535.06	-0.00309		3535.06	-0.00142		3535.06	-0.01687		3535.06	-0.01687
3534.58	-0.0032		3534.58	-0.00152		3534.58	-0.01723		3534.58	-0.01723
3534.09	-0.00326		3534.09	-0.00131		3534.09	-0.01727		3534.09	-0.01727
3533.61	-0.00351		3533.61	-0.00065		3533.61	-0.01725		3533.61	-0.01725
3533.13	-0.00348		3533.13	-0.00061		3533.13	-0.01738		3533.13	-0.01738
3532.65	-0.0031		3532.65	-0.00112		3532.65	-0.01743		3532.65	-0.01743
3532.17	-0.00289		3532.17	-0.00118		3532.17	-0.01753		3532.17	-0.01753
3531.68	-0.00288		3531.68	-0.00103		3531.68	-0.01762		3531.68	-0.01762
3531.2	-0.00301		3531.2	-0.00098		3531.2	-0.01751		3531.2	-0.01751
3530.72	-0.00313		3530.72	-0.00092		3530.72	-0.01735		3530.72	-0.01735
3530.24	-0.00326		3530.24	-0.001		3530.24	-0.01725		3530.24	-0.01725
3529.76	-0.00333		3529.76	-0.00097		3529.76	-0.01743		3529.76	-0.01743
3529.27	-0.00316		3529.27	-0.00098		3529.27	-0.01788		3529.27	-0.01788
3528.79	-0.00313		3528.79	-0.00116		3528.79	-0.01801		3528.79	-0.01801
3528.31	-0.00309		3528.31	-0.00105		3528.31	-0.01778		3528.31	-0.01778
3527.83	-0.00285		3527.83	-0.00076		3527.83	-0.01751		3527.83	-0.01751
3527.34	-0.00271		3527.34	-0.00051		3527.34	-0.01728		3527.34	-0.01728
3526.86	-0.00278		3526.86	-0.00048		3526.86	-0.01731		3526.86	-0.01731
3526.38	-0.00302		3526.38	-0.00082		3526.38	-0.01742		3526.38	-0.01742
3525.9	-0.00303		3525.9	-0.00118		3525.9	-0.01731		3525.9	-0.01731
3525.42	-0.00287		3525.42	-0.00108		3525.42	-0.01714		3525.42	-0.01714
3524.93	-0.00286		3524.93	-0.0009		3524.93	-0.01706		3524.93	-0.01706
3524.45	-0.00289		3524.45	-0.00121		3524.45	-0.0171		3524.45	-0.0171
3523.97	-0.00286		3523.97	-0.00159		3523.97	-0.01734		3523.97	-0.01734
3523.49	-0.00264		3523.49	-0.00146		3523.49	-0.01754		3523.49	-0.01754
3523.01	-0.00269		3523.01	-0.00105		3523.01	-0.01755		3523.01	-0.01755
3522.52	-0.00328		3522.52	-0.00076		3522.52	-0.01756		3522.52	-0.01756
3522.04	-0.00344		3522.04	-0.00075		3522.04	-0.01749		3522.04	-0.01749
3521.56	-0.00311		3521.56	-0.00104		3521.56	-0.01738		3521.56	-0.01738
3521.08	-0.00308		3521.08	-0.00141		3521.08	-0.0175		3521.08	-0.0175
3520.59	-0.00328		3520.59	-0.00149		3520.59	-0.01749		3520.59	-0.01749
3520.11	-0.00347		3520.11	-0.00138		3520.11	-0.01726		3520.11	-0.01726
3519.63	-0.00363		3519.63	-0.00139		3519.63	-0.01704		3519.63	-0.01704
3519.15	-0.00357		3519.15	-0.00136		3519.15	-0.01695		3519.15	-0.01695
3518.67	-0.00353		3518.67	-0.00118		3518.67	-0.01717		3518.67	-0.01717
3518.18	-0.00356		3518.18	-0.00099		3518.18	-0.01745		3518.18	-0.01745
3517.7	-0.00343		3517.7	-0.00084		3517.7	-0.01753		3517.7	-0.01753
3517.22	-0.00325		3517.22	-0.00081		3517.22	-0.01759		3517.22	-0.01759
3516.74	-0.00328		3516.74	-0.00084		3516.74	-0.01758		3516.74	-0.01758
3516.26	-0.00362		3516.26	-0.0009		3516.26	-0.01744		3516.26	-0.01744
3515.77	-0.00381		3515.77	-0.00113		3515.77	-0.01736		3515.77	-0.01736
3515.29	-0.00376		3515.29	-0.0013		3515.29	-0.0174		3515.29	-0.0174
3514.81	-0.00357		3514.81	-0.00129		3514.81	-0.01739		3514.81	-0.01739
3514.33	-0.00328		3514.33	-0.00138		3514.33	-0.01737		3514.33	-0.01737
3513.84	-0.00312		3513.84	-0.00135		3513.84	-0.01743		3513.84	-0.01743
3513.36	-0.00296		3513.36	-0.00112		3513.36	-0.01738		3513.36	-0.01738
3512.88	-0.00292		3512.88	-0.00114		3512.88	-0.01736		3512.88	-0.01736
3512.4	-0.00303		3512.4	-0.00138		3512.4	-0.01747		3512.4	-0.01747
3511.92	-0.00319		3511.92	-0.00134		3511.92	-0.01768		3511.92	-0.01768
3511.43	-0.00342		3511.43	-0.00127		3511.43	-0.01798		3511.43	-0.01798
3510.95	-0.00338		3510.95	-0.00145		3510.95	-0.01788		3510.95	-0.01788
3510.47	-0.00318		3510.47	-0.00149		3510.47	-0.01757		3510.47	-0.01757
3509.99	-0.00286		3509.99	-0.00139		3509.99	-0.01756		3509.99	-0.01756
3509.51	-0.00272		3509.51	-0.0012		3509.51	-0.01748		3509.51	-0.01748
3509.02	-0.00318		3509.02	-0.00104		3509.02	-0.01741		3509.02	-0.01741
3508.54	-0.00354		3508.54	-0.00116		3508.54	-0.01758		3508.54	-0.01758
3508.06	-0.0035		3508.06	-0.00128		3508.06	-0.0177		3508.06	-0.0177
3507.58	-0.00337		3507.58	-0.00118		3507.58	-0.01766		3507.58	-0.01766
3507.09	-0.00335		3507.09	-0.00107		3507.09	-0.01759		3507.09	-0.01759
3506.61	-0.00339		3506.61	-0.00113		3506.61	-0.0176		3506.61	-0.0176
3506.13	-0.00316		3506.13	-0.00123		3506.13	-0.01756		3506.13	-0.01756
3505.65	-0.00275		3505.65	-0.00134		3505.65	-0.01759		3505.65	-0.01759
3505.17	-0.0028		3505.17	-0.00138		3505.17	-0.01752		3505.17	-0.01752
3504.68	-0.00334		3504.68	-0.00122		3504.68	-0.01736		3504.68	-0.01736
3504.2	-0.0036		3504.2	-0.00105		3504.2	-0.01745		3504.2	-0.01745
3503.72	-0.00328		3503.72	-0.00085		3503.72	-0.01741		3503.72	-0.01741
3503.24	-0.00293		3503.24	-0.00083		3503.24	-0.01722		3503.24	-0.01722
3502.76	-0.00304		3502.76	-0.00116		3502.76	-0.01719		3502.76	-0.01719
3502.27	-0.00317		3502.27	-0.00132		3502.27	-0.01729		3502.27	-0.01729
3501.79	-0.00309		3501.79	-0.0011		3501.79	-0.01752		3501.79	-0.01752
3501.31	-0.00317		3501.31	-0.00109		3501.31	-0.01773		3501.31	-0.01773
3500.83	-0.00321		3500.83	-0.00136		3500.83	-0.01779		3500.83	-0.01779
3500.34	-0.00313		3500.34	-0.00145		3500.34	-0.01771		3500.34	-0.01771
3499.86	-0.003		3499.86	-0.0016		3499.86	-0.01758		3499.86	-0.01758
3499.38	-0.00291		3499.38	-0.00184		3499.38	-0.01757		3499.38	-0.01757
3498.9	-0.00315		3498.9	-0.00216		3498.9	-0.01778		3498.9	-0.01778
3498.42	-0.0033		3498.42	-0.00233		3498.42	-0.01804		3498.42	-0.01804
3497.93	-0.00333		3497.93	-0.00215		3497.93	-0.01811		3497.93	-0.01811
3497.45	-0.00362		3497.45	-0.00227		3497.45	-0.01785		3497.45	-0.01785
3496.97	-0.00368		3496.97	-0.00211		3496.97	-0.01759		3496.97	-0.01759
3496.49	-0.00342		3496.49	-0.00164		3496.49	-0.01757		3496.49	-0.01757
3496.01	-0.00344		3496.01	-0.00179		3496.01	-0.01741		3496.01	-0.01741
3495.52	-0.00347		3495.52	-0.00189		3495.52	-0.01739		3495.52	-0.01739
3495.04	-0.00335		3495.04	-0.00184		3495.04	-0.01747		3495.04	-0.01747
3494.56	-0.0035		3494.56	-0.00208		3494.56	-0.01744		3494.56	-0.01744
3494.08	-0.00364		3494.08	-0.00225		3494.08	-0.01751		3494.08	-0.01751
3493.59	-0.00365		3493.59	-0.00215		3493.59	-0.0175		3493.59	-0.0175
3493.11	-0.00367		3493.11	-0.00224		3493.11	-0.01768		3493.11	-0.01768
3492.63	-0.00362		3492.63	-0.00247		3492.63	-0.01774		3492.63	-0.01774
3492.15	-0.00346		3492.15	-0.00238		3492.15	-0.01744		3492.15	-0.01744
3491.67	-0.0032		3491.67	-0.00244		3491.67	-0.01753		3491.67	-0.01753
3491.18	-0.00317		3491.18	-0.00252		3491.18	-0.01759		3491.18	-0.01759
3490.7	-0.00341		3490.7	-0.00231		3490.7	-0.01743		3490.7	-0.01743
3490.22	-0.00356		3490.22	-0.00226		3490.22	-0.0174		3490.22	-0.0174
3489.74	-0.00334		3489.74	-0.00231		3489.74	-0.01734		3489.74	-0.01734
3489.26	-0.00294		3489.26	-0.00243		3489.26	-0.01722		3489.26	-0.01722
3488.77	-0.00283		3488.77	-0.00234		3488.77	-0.01712		3488.77	-0.01712
3488.29	-0.00295		3488.29	-0.00207		3488.29	-0.01718		3488.29	-0.01718
3487.81	-0.00316		3487.81	-0.00206		3487.81	-0.01743		3487.81	-0.01743
3487.33	-0.00343		3487.33	-0.00206		3487.33	-0.01761		3487.33	-0.01761
3486.84	-0.00353		3486.84	-0.00207		3486.84	-0.01762		3486.84	-0.01762
3486.36	-0.00331		3486.36	-0.00219		3486.36	-0.01762		3486.36	-0.01762
3485.88	-0.00312		3485.88	-0.00227		3485.88	-0.01766		3485.88	-0.01766
3485.4	-0.00325		3485.4	-0.00234		3485.4	-0.01754		3485.4	-0.01754
3484.92	-0.00331		3484.92	-0.00244		3484.92	-0.01729		3484.92	-0.01729
3484.43	-0.00309		3484.43	-0.00255		3484.43	-0.01723		3484.43	-0.01723
3483.95	-0.00285		3483.95	-0.00249		3483.95	-0.01723		3483.95	-0.01723
3483.47	-0.00286		3483.47	-0.00242		3483.47	-0.01715		3483.47	-0.01715
3482.99	-0.00295		3482.99	-0.00228		3482.99	-0.01719		3482.99	-0.01719
3482.51	-0.00289		3482.51	-0.002		3482.51	-0.01729		3482.51	-0.01729
3482.02	-0.00293		3482.02	-0.00209		3482.02	-0.01735		3482.02	-0.01735
3481.54	-0.00305		3481.54	-0.00242		3481.54	-0.01732		3481.54	-0.01732
3481.06	-0.00313		3481.06	-0.00265		3481.06	-0.01728		3481.06	-0.01728
3480.58	-0.00319		3480.58	-0.00281		3480.58	-0.01735		3480.58	-0.01735
3480.09	-0.00322		3480.09	-0.00281		3480.09	-0.01744		3480.09	-0.01744
3479.61	-0.00313		3479.61	-0.00273		3479.61	-0.01744		3479.61	-0.01744
3479.13	-0.00304		3479.13	-0.00264		3479.13	-0.0173		3479.13	-0.0173
3478.65	-0.00326		3478.65	-0.00255		3478.65	-0.01716		3478.65	-0.01716
3478.17	-0.00348		3478.17	-0.00248		3478.17	-0.01719		3478.17	-0.01719
3477.68	-0.00338		3477.68	-0.00251		3477.68	-0.01733		3477.68	-0.01733
3477.2	-0.00328		3477.2	-0.0025		3477.2	-0.01739		3477.2	-0.01739
3476.72	-0.00316		3476.72	-0.00236		3476.72	-0.01715		3476.72	-0.01715
3476.24	-0.00298		3476.24	-0.00243		3476.24	-0.01685		3476.24	-0.01685
3475.76	-0.00303		3475.76	-0.0025		3475.76	-0.0169		3475.76	-0.0169
3475.27	-0.00312		3475.27	-0.00241		3475.27	-0.01719		3475.27	-0.01719
3474.79	-0.00323		3474.79	-0.00257		3474.79	-0.01741		3474.79	-0.01741
3474.31	-0.00337		3474.31	-0.00273		3474.31	-0.01747		3474.31	-0.01747
3473.83	-0.00317		3473.83	-0.00279		3473.83	-0.01761		3473.83	-0.01761
3473.34	-0.00298		3473.34	-0.0027		3473.34	-0.0177		3473.34	-0.0177
3472.86	-0.00298		3472.86	-0.00254		3472.86	-0.01763		3472.86	-0.01763
3472.38	-0.00298		3472.38	-0.00265		3472.38	-0.01768		3472.38	-0.01768
3471.9	-0.00307		3471.9	-0.00274		3471.9	-0.01759		3471.9	-0.01759
3471.42	-0.00305		3471.42	-0.00274		3471.42	-0.01725		3471.42	-0.01725
3470.93	-0.00295		3470.93	-0.0025		3470.93	-0.01722		3470.93	-0.01722
3470.45	-0.00288		3470.45	-0.0022		3470.45	-0.0175		3470.45	-0.0175
3469.97	-0.00283		3469.97	-0.0023		3469.97	-0.01754		3469.97	-0.01754
3469.49	-0.00298		3469.49	-0.00231		3469.49	-0.01751		3469.49	-0.01751
3469.01	-0.00307		3469.01	-0.00227		3469.01	-0.01772		3469.01	-0.01772
3468.52	-0.00289		3468.52	-0.00247		3468.52	-0.01768		3468.52	-0.01768
3468.04	-0.00276		3468.04	-0.00268		3468.04	-0.01738		3468.04	-0.01738
3467.56	-0.00278		3467.56	-0.00276		3467.56	-0.01712		3467.56	-0.01712
3467.08	-0.00267		3467.08	-0.00259		3467.08	-0.01685		3467.08	-0.01685
3466.59	-0.00278		3466.59	-0.00243		3466.59	-0.01692		3466.59	-0.01692
3466.11	-0.00308		3466.11	-0.00246		3466.11	-0.01731		3466.11	-0.01731
3465.63	-0.00292		3465.63	-0.00266		3465.63	-0.01767		3465.63	-0.01767
3465.15	-0.00266		3465.15	-0.00301		3465.15	-0.01788		3465.15	-0.01788
3464.67	-0.00282		3464.67	-0.00314		3464.67	-0.01772		3464.67	-0.01772
3464.18	-0.00306		3464.18	-0.00297		3464.18	-0.01728		3464.18	-0.01728
3463.7	-0.00294		3463.7	-0.00277		3463.7	-0.01713		3463.7	-0.01713
3463.22	-0.00265		3463.22	-0.0025		3463.22	-0.01727		3463.22	-0.01727
3462.74	-0.00251		3462.74	-0.00215		3462.74	-0.01729		3462.74	-0.01729
3462.26	-0.00241		3462.26	-0.00226		3462.26	-0.01731		3462.26	-0.01731
3461.77	-0.00248		3461.77	-0.00264		3461.77	-0.01753		3461.77	-0.01753
3461.29	-0.00266		3461.29	-0.00271		3461.29	-0.01755		3461.29	-0.01755
3460.81	-0.00264		3460.81	-0.00265		3460.81	-0.01727		3460.81	-0.01727
3460.33	-0.00278		3460.33	-0.00253		3460.33	-0.01714		3460.33	-0.01714
3459.84	-0.00294		3459.84	-0.0024		3459.84	-0.01722		3459.84	-0.01722
3459.36	-0.00278		3459.36	-0.00221		3459.36	-0.01711		3459.36	-0.01711
3458.88	-0.00267		3458.88	-0.00203		3458.88	-0.01682		3458.88	-0.01682
3458.4	-0.00262		3458.4	-0.00223		3458.4	-0.01692		3458.4	-0.01692
3457.92	-0.00261		3457.92	-0.00241		3457.92	-0.01724		3457.92	-0.01724
3457.43	-0.00268		3457.43	-0.00237		3457.43	-0.01723		3457.43	-0.01723
3456.95	-0.00254		3456.95	-0.00244		3456.95	-0.01703		3456.95	-0.01703
3456.47	-0.00236		3456.47	-0.00251		3456.47	-0.01697		3456.47	-0.01697
3455.99	-0.00238		3455.99	-0.00245		3455.99	-0.01717		3455.99	-0.01717
3455.51	-0.00276		3455.51	-0.00235		3455.51	-0.01751		3455.51	-0.01751
3455.02	-0.00312		3455.02	-0.0023		3455.02	-0.01765		3455.02	-0.01765
3454.54	-0.00292		3454.54	-0.00234		3454.54	-0.01758		3454.54	-0.01758
3454.06	-0.00261		3454.06	-0.00237		3454.06	-0.01754		3454.06	-0.01754
3453.58	-0.00263		3453.58	-0.00251		3453.58	-0.01751		3453.58	-0.01751
3453.09	-0.00289		3453.09	-0.00276		3453.09	-0.01726		3453.09	-0.01726
3452.61	-0.00294		3452.61	-0.0027		3452.61	-0.01691		3452.61	-0.01691
3452.13	-0.00285		3452.13	-0.00253		3452.13	-0.01705		3452.13	-0.01705
3451.65	-0.003		3451.65	-0.0026		3451.65	-0.0175		3451.65	-0.0175
3451.17	-0.00298		3451.17	-0.00274		3451.17	-0.01759		3451.17	-0.01759
3450.68	-0.00284		3450.68	-0.003		3450.68	-0.01759		3450.68	-0.01759
3450.2	-0.00276		3450.2	-0.00307		3450.2	-0.01772		3450.2	-0.01772
3449.72	-0.00277		3449.72	-0.00272		3449.72	-0.01774		3449.72	-0.01774
3449.24	-0.0028		3449.24	-0.00237		3449.24	-0.01751		3449.24	-0.01751
3448.76	-0.0028		3448.76	-0.00217		3448.76	-0.01717		3448.76	-0.01717
3448.27	-0.00295		3448.27	-0.00219		3448.27	-0.01709		3448.27	-0.01709
3447.79	-0.00287		3447.79	-0.0022		3447.79	-0.01726		3447.79	-0.01726
3447.31	-0.00262		3447.31	-0.0021		3447.31	-0.01735		3447.31	-0.01735
3446.83	-0.00272		3446.83	-0.00224		3446.83	-0.01724		3446.83	-0.01724
3446.34	-0.00299		3446.34	-0.00254		3446.34	-0.01729		3446.34	-0.01729
3445.86	-0.00315		3445.86	-0.0028		3445.86	-0.01764		3445.86	-0.01764
3445.38	-0.00331		3445.38	-0.00272		3445.38	-0.0179		3445.38	-0.0179
3444.9	-0.00343		3444.9	-0.0024		3444.9	-0.01793		3444.9	-0.01793
3444.42	-0.00313		3444.42	-0.00216		3444.42	-0.01766		3444.42	-0.01766
3443.93	-0.00271		3443.93	-0.0021		3443.93	-0.01754		3443.93	-0.01754
3443.45	-0.0025		3443.45	-0.00214		3443.45	-0.01775		3443.45	-0.01775
3442.97	-0.00242		3442.97	-0.00206		3442.97	-0.0176		3442.97	-0.0176
3442.49	-0.00266		3442.49	-0.00223		3442.49	-0.01729		3442.49	-0.01729
3442.01	-0.00295		3442.01	-0.00248		3442.01	-0.01737		3442.01	-0.01737
3441.52	-0.00304		3441.52	-0.00238		3441.52	-0.01747		3441.52	-0.01747
3441.04	-0.00296		3441.04	-0.00213		3441.04	-0.01734		3441.04	-0.01734
3440.56	-0.00284		3440.56	-0.00179		3440.56	-0.01736		3440.56	-0.01736
3440.08	-0.00282		3440.08	-0.00179		3440.08	-0.0174		3440.08	-0.0174
3439.59	-0.00278		3439.59	-0.00216		3439.59	-0.01726		3439.59	-0.01726
3439.11	-0.00274		3439.11	-0.00236		3439.11	-0.01718		3439.11	-0.01718
3438.63	-0.00287		3438.63	-0.00236		3438.63	-0.0173		3438.63	-0.0173
3438.15	-0.00317		3438.15	-0.00222		3438.15	-0.01763		3438.15	-0.01763
3437.67	-0.00337		3437.67	-0.00211		3437.67	-0.01777		3437.67	-0.01777
3437.18	-0.00331		3437.18	-0.0021		3437.18	-0.01753		3437.18	-0.01753
3436.7	-0.00316		3436.7	-0.00214		3436.7	-0.01719		3436.7	-0.01719
3436.22	-0.00297		3436.22	-0.00245		3436.22	-0.01695		3436.22	-0.01695
3435.74	-0.00268		3435.74	-0.00285		3435.74	-0.01689		3435.74	-0.01689
3435.26	-0.00252		3435.26	-0.00286		3435.26	-0.01713		3435.26	-0.01713
3434.77	-0.00266		3434.77	-0.00253		3434.77	-0.01763		3434.77	-0.01763
3434.29	-0.00289		3434.29	-0.0023		3434.29	-0.01773		3434.29	-0.01773
3433.81	-0.00302		3433.81	-0.00227		3433.81	-0.01741		3433.81	-0.01741
3433.33	-0.00285		3433.33	-0.0023		3433.33	-0.01747		3433.33	-0.01747
3432.84	-0.00244		3432.84	-0.00222		3432.84	-0.0176		3432.84	-0.0176
3432.36	-0.00233		3432.36	-0.00204		3432.36	-0.01743		3432.36	-0.01743
3431.88	-0.00243		3431.88	-0.00214		3431.88	-0.01724		3431.88	-0.01724
3431.4	-0.00252		3431.4	-0.00248		3431.4	-0.01725		3431.4	-0.01725
3430.92	-0.00275		3430.92	-0.00255		3430.92	-0.01735		3430.92	-0.01735
3430.43	-0.00284		3430.43	-0.00224		3430.43	-0.01734		3430.43	-0.01734
3429.95	-0.00274		3429.95	-0.0019		3429.95	-0.01735		3429.95	-0.01735
3429.47	-0.00274		3429.47	-0.00193		3429.47	-0.01746		3429.47	-0.01746
3428.99	-0.00256		3428.99	-0.00218		3428.99	-0.01756		3428.99	-0.01756
3428.51	-0.00216		3428.51	-0.00221		3428.51	-0.01767		3428.51	-0.01767
3428.02	-0.00201		3428.02	-0.00221		3428.02	-0.01778		3428.02	-0.01778
3427.54	-0.00219		3427.54	-0.00224		3427.54	-0.01768		3427.54	-0.01768
3427.06	-0.00244		3427.06	-0.00209		3427.06	-0.01731		3427.06	-0.01731
3426.58	-0.00246		3426.58	-0.00198		3426.58	-0.01707		3426.58	-0.01707
3426.09	-0.00225		3426.09	-0.00229		3426.09	-0.01708		3426.09	-0.01708
3425.61	-0.00197		3425.61	-0.00274		3425.61	-0.01719		3425.61	-0.01719
3425.13	-0.00175		3425.13	-0.00272		3425.13	-0.01731		3425.13	-0.01731
3424.65	-0.00172		3424.65	-0.00239		3424.65	-0.01735		3424.65	-0.01735
3424.17	-0.00173		3424.17	-0.00243		3424.17	-0.01729		3424.17	-0.01729
3423.68	-0.00169		3423.68	-0.00264		3423.68	-0.01725		3423.68	-0.01725
3423.2	-0.00183		3423.2	-0.0025		3423.2	-0.01737		3423.2	-0.01737
3422.72	-0.00185		3422.72	-0.00239		3422.72	-0.01753		3422.72	-0.01753
3422.24	-0.00178		3422.24	-0.0025		3422.24	-0.01747		3422.24	-0.01747
3421.76	-0.00188		3421.76	-0.00242		3421.76	-0.01734		3421.76	-0.01734
3421.27	-0.00163		3421.27	-0.00215		3421.27	-0.01751		3421.27	-0.01751
3420.79	-0.00124		3420.79	-0.0018		3420.79	-0.01753		3420.79	-0.01753
3420.31	-0.00126		3420.31	-0.00173		3420.31	-0.01721		3420.31	-0.01721
3419.83	-0.00158		3419.83	-0.00195		3419.83	-0.0171		3419.83	-0.0171
3419.34	-0.00194		3419.34	-0.00186		3419.34	-0.01715		3419.34	-0.01715
3418.86	-0.00203		3418.86	-0.00167		3418.86	-0.01728		3418.86	-0.01728
3418.38	-0.00204		3418.38	-0.0017		3418.38	-0.01758		3418.38	-0.01758
3417.9	-0.00196		3417.9	-0.00191		3417.9	-0.01766		3417.9	-0.01766
3417.42	-0.00183		3417.42	-0.00207		3417.42	-0.01746		3417.42	-0.01746
3416.93	-0.00198		3416.93	-0.00199		3416.93	-0.0172		3416.93	-0.0172
3416.45	-0.00195		3416.45	-0.00195		3416.45	-0.01707		3416.45	-0.01707
3415.97	-0.00189		3415.97	-0.00194		3415.97	-0.01714		3415.97	-0.01714
3415.49	-0.00211		3415.49	-0.00188		3415.49	-0.01711		3415.49	-0.01711
3415.01	-0.00221		3415.01	-0.00186		3415.01	-0.01709		3415.01	-0.01709
3414.52	-0.00194		3414.52	-0.00199		3414.52	-0.01732		3414.52	-0.01732
3414.04	-0.00167		3414.04	-0.00225		3414.04	-0.01752		3414.04	-0.01752
3413.56	-0.00179		3413.56	-0.0022		3413.56	-0.0176		3413.56	-0.0176
3413.08	-0.00195		3413.08	-0.00188		3413.08	-0.0176		3413.08	-0.0176
3412.59	-0.00201		3412.59	-0.0018		3412.59	-0.0176		3412.59	-0.0176
3412.11	-0.002		3412.11	-0.00185		3412.11	-0.01748		3412.11	-0.01748
3411.63	-0.00208		3411.63	-0.0017		3411.63	-0.01733		3411.63	-0.01733
3411.15	-0.00226		3411.15	-0.00158		3411.15	-0.01751		3411.15	-0.01751
3410.67	-0.0022		3410.67	-0.00175		3410.67	-0.01765		3410.67	-0.01765
3410.18	-0.00217		3410.18	-0.00201		3410.18	-0.01748		3410.18	-0.01748
3409.7	-0.0022		3409.7	-0.00223		3409.7	-0.01741		3409.7	-0.01741
3409.22	-0.00215		3409.22	-0.00235		3409.22	-0.01756		3409.22	-0.01756
3408.74	-0.00223		3408.74	-0.00246		3408.74	-0.01753		3408.74	-0.01753
3408.26	-0.00232		3408.26	-0.00252		3408.26	-0.01727		3408.26	-0.01727
3407.77	-0.00239		3407.77	-0.00235		3407.77	-0.01726		3407.77	-0.01726
3407.29	-0.00232		3407.29	-0.00212		3407.29	-0.01737		3407.29	-0.01737
3406.81	-0.00225		3406.81	-0.0021		3406.81	-0.01736		3406.81	-0.01736
3406.33	-0.00235		3406.33	-0.00225		3406.33	-0.01726		3406.33	-0.01726
3405.84	-0.0024		3405.84	-0.0024		3405.84	-0.01723		3405.84	-0.01723
3405.36	-0.00242		3405.36	-0.00258		3405.36	-0.0173		3405.36	-0.0173
3404.88	-0.00246		3404.88	-0.00258		3404.88	-0.01728		3404.88	-0.01728
3404.4	-0.00249		3404.4	-0.00248		3404.4	-0.01733		3404.4	-0.01733
3403.92	-0.00251		3403.92	-0.00241		3403.92	-0.0174		3403.92	-0.0174
3403.43	-0.00255		3403.43	-0.00223		3403.43	-0.01732		3403.43	-0.01732
3402.95	-0.00254		3402.95	-0.00213		3402.95	-0.01728		3402.95	-0.01728
3402.47	-0.00236		3402.47	-0.00207		3402.47	-0.01733		3402.47	-0.01733
3401.99	-0.00229		3401.99	-0.00202		3401.99	-0.01727		3401.99	-0.01727
3401.51	-0.00254		3401.51	-0.00201		3401.51	-0.0171		3401.51	-0.0171
3401.02	-0.00275		3401.02	-0.00196		3401.02	-0.01721		3401.02	-0.01721
3400.54	-0.00256		3400.54	-0.00187		3400.54	-0.01746		3400.54	-0.01746
3400.06	-0.00219		3400.06	-0.0018		3400.06	-0.01757		3400.06	-0.01757
3399.58	-0.00209		3399.58	-0.00185		3399.58	-0.0177		3399.58	-0.0177
3399.09	-0.00219		3399.09	-0.00187		3399.09	-0.01785		3399.09	-0.01785
3398.61	-0.00231		3398.61	-0.00197		3398.61	-0.01786		3398.61	-0.01786
3398.13	-0.00245		3398.13	-0.00234		3398.13	-0.01762		3398.13	-0.01762
3397.65	-0.00243		3397.65	-0.00248		3397.65	-0.01716		3397.65	-0.01716
3397.17	-0.00245		3397.17	-0.00238		3397.17	-0.01674		3397.17	-0.01674
3396.68	-0.00248		3396.68	-0.00237		3396.68	-0.01675		3396.68	-0.01675
3396.2	-0.00246		3396.2	-0.00238		3396.2	-0.01698		3396.2	-0.01698
3395.72	-0.00277		3395.72	-0.00232		3395.72	-0.01711		3395.72	-0.01711
3395.24	-0.00285		3395.24	-0.00246		3395.24	-0.01737		3395.24	-0.01737
3394.76	-0.00264		3394.76	-0.00242		3394.76	-0.01736		3394.76	-0.01736
3394.27	-0.00259		3394.27	-0.00188		3394.27	-0.0172		3394.27	-0.0172
3393.79	-0.00239		3393.79	-0.00179		3393.79	-0.01727		3393.79	-0.01727
3393.31	-0.0022		3393.31	-0.00224		3393.31	-0.01733		3393.31	-0.01733
3392.83	-0.00234		3392.83	-0.00236		3392.83	-0.0175		3392.83	-0.0175
3392.34	-0.00261		3392.34	-0.00202		3392.34	-0.01764		3392.34	-0.01764
3391.86	-0.00263		3391.86	-0.0016		3391.86	-0.01746		3391.86	-0.01746
3391.38	-0.0025		3391.38	-0.00157		3391.38	-0.01728		3391.38	-0.01728
3390.9	-0.00249		3390.9	-0.00174		3390.9	-0.01746		3390.9	-0.01746
3390.42	-0.00255		3390.42	-0.00181		3390.42	-0.01747		3390.42	-0.01747
3389.93	-0.00265		3389.93	-0.00177		3389.93	-0.01722		3389.93	-0.01722
3389.45	-0.00247		3389.45	-0.00171		3389.45	-0.01738		3389.45	-0.01738
3388.97	-0.00237		3388.97	-0.00194		3388.97	-0.01745		3388.97	-0.01745
3388.49	-0.00273		3388.49	-0.00229		3388.49	-0.01743		3388.49	-0.01743
3388.01	-0.00287		3388.01	-0.00228		3388.01	-0.01769		3388.01	-0.01769
3387.52	-0.00267		3387.52	-0.00214		3387.52	-0.01768		3387.52	-0.01768
3387.04	-0.00251		3387.04	-0.00228		3387.04	-0.01751		3387.04	-0.01751
3386.56	-0.00256		3386.56	-0.00222		3386.56	-0.01737		3386.56	-0.01737
3386.08	-0.00264		3386.08	-0.00189		3386.08	-0.01725		3386.08	-0.01725
3385.59	-0.00258		3385.59	-0.00194		3385.59	-0.01716		3385.59	-0.01716
3385.11	-0.0026		3385.11	-0.00211		3385.11	-0.017		3385.11	-0.017
3384.63	-0.00273		3384.63	-0.002		3384.63	-0.0169		3384.63	-0.0169
3384.15	-0.00278		3384.15	-0.00185		3384.15	-0.0169		3384.15	-0.0169
3383.67	-0.00267		3383.67	-0.00189		3383.67	-0.01705		3383.67	-0.01705
3383.18	-0.00256		3383.18	-0.00182		3383.18	-0.01716		3383.18	-0.01716
3382.7	-0.00259		3382.7	-0.00169		3382.7	-0.0171		3382.7	-0.0171
3382.22	-0.00264		3382.22	-0.00188		3382.22	-0.01723		3382.22	-0.01723
3381.74	-0.00265		3381.74	-0.00203		3381.74	-0.01739		3381.74	-0.01739
3381.26	-0.00252		3381.26	-0.00204		3381.26	-0.01726		3381.26	-0.01726
3380.77	-0.00253		3380.77	-0.00209		3380.77	-0.01708		3380.77	-0.01708
3380.29	-0.00276		3380.29	-0.00223		3380.29	-0.01698		3380.29	-0.01698
3379.81	-0.00272		3379.81	-0.00229		3379.81	-0.01701		3379.81	-0.01701
3379.33	-0.00255		3379.33	-0.00179		3379.33	-0.01713		3379.33	-0.01713
3378.84	-0.00243		3378.84	-0.00144		3378.84	-0.01727		3378.84	-0.01727
3378.36	-0.00227		3378.36	-0.00178		3378.36	-0.01745		3378.36	-0.01745
3377.88	-0.00243		3377.88	-0.00221		3377.88	-0.01759		3377.88	-0.01759
3377.4	-0.00279		3377.4	-0.00241		3377.4	-0.01762		3377.4	-0.01762
3376.92	-0.00273		3376.92	-0.00235		3376.92	-0.01749		3376.92	-0.01749
3376.43	-0.00247		3376.43	-0.00223		3376.43	-0.01735		3376.43	-0.01735
3375.95	-0.00245		3375.95	-0.00227		3375.95	-0.01731		3375.95	-0.01731
3375.47	-0.00255		3375.47	-0.00238		3375.47	-0.01723		3375.47	-0.01723
3374.99	-0.00256		3374.99	-0.00249		3374.99	-0.0173		3374.99	-0.0173
3374.51	-0.00269		3374.51	-0.0025		3374.51	-0.0176		3374.51	-0.0176
3374.02	-0.00283		3374.02	-0.00251		3374.02	-0.01777		3374.02	-0.01777
3373.54	-0.00279		3373.54	-0.00255		3373.54	-0.01771		3373.54	-0.01771
3373.06	-0.00272		3373.06	-0.00244		3373.06	-0.01761		3373.06	-0.01761
3372.58	-0.00261		3372.58	-0.00223		3372.58	-0.01763		3372.58	-0.01763
3372.09	-0.00252		3372.09	-0.00225		3372.09	-0.0176		3372.09	-0.0176
3371.61	-0.00257		3371.61	-0.0025		3371.61	-0.0174		3371.61	-0.0174
3371.13	-0.00268		3371.13	-0.00257		3371.13	-0.01737		3371.13	-0.01737
3370.65	-0.00269		3370.65	-0.00259		3370.65	-0.01746		3370.65	-0.01746
3370.17	-0.00257		3370.17	-0.00249		3370.17	-0.01748		3370.17	-0.01748
3369.68	-0.00247		3369.68	-0.00217		3369.68	-0.01744		3369.68	-0.01744
3369.2	-0.0026		3369.2	-0.00211		3369.2	-0.01746		3369.2	-0.01746
3368.72	-0.0027		3368.72	-0.00217		3368.72	-0.01774		3368.72	-0.01774
3368.24	-0.0024		3368.24	-0.00213		3368.24	-0.01784		3368.24	-0.01784
3367.76	-0.0022		3367.76	-0.00242		3367.76	-0.01755		3367.76	-0.01755
3367.27	-0.00239		3367.27	-0.00285		3367.27	-0.01742		3367.27	-0.01742
3366.79	-0.00248		3366.79	-0.00277		3366.79	-0.01741		3366.79	-0.01741
3366.31	-0.00231		3366.31	-0.00246		3366.31	-0.01722		3366.31	-0.01722
3365.83	-0.00232		3365.83	-0.00258		3365.83	-0.01712		3365.83	-0.01712
3365.34	-0.00257		3365.34	-0.00306		3365.34	-0.01728		3365.34	-0.01728
3364.86	-0.00248		3364.86	-0.00328		3364.86	-0.01728		3364.86	-0.01728
3364.38	-0.00237		3364.38	-0.00301		3364.38	-0.01704		3364.38	-0.01704
3363.9	-0.00254		3363.9	-0.00288		3363.9	-0.01691		3363.9	-0.01691
3363.42	-0.00265		3363.42	-0.00302		3363.42	-0.01692		3363.42	-0.01692
3362.93	-0.00265		3362.93	-0.00289		3362.93	-0.01709		3362.93	-0.01709
3362.45	-0.00254		3362.45	-0.00259		3362.45	-0.0175		3362.45	-0.0175
3361.97	-0.00239		3361.97	-0.00234		3361.97	-0.01772		3361.97	-0.01772
3361.49	-0.0023		3361.49	-0.0025		3361.49	-0.01749		3361.49	-0.01749
3361.01	-0.00239		3361.01	-0.00292		3361.01	-0.01733		3361.01	-0.01733
3360.52	-0.0025		3360.52	-0.00293		3360.52	-0.01738		3360.52	-0.01738
3360.04	-0.00249		3360.04	-0.00269		3360.04	-0.01721		3360.04	-0.01721
3359.56	-0.00245		3359.56	-0.00253		3359.56	-0.01705		3359.56	-0.01705
3359.08	-0.00223		3359.08	-0.00269		3359.08	-0.01707		3359.08	-0.01707
3358.59	-0.00204		3358.59	-0.00313		3358.59	-0.01707		3358.59	-0.01707
3358.11	-0.00198		3358.11	-0.00315		3358.11	-0.01714		3358.11	-0.01714
3357.63	-0.00193		3357.63	-0.00255		3357.63	-0.01724		3357.63	-0.01724
3357.15	-0.00195		3357.15	-0.00203		3357.15	-0.01719		3357.15	-0.01719
3356.67	-0.00205		3356.67	-0.00203		3356.67	-0.01712		3356.67	-0.01712
3356.18	-0.00219		3356.18	-0.00208		3356.18	-0.01736		3356.18	-0.01736
3355.7	-0.00214		3355.7	-0.00229		3355.7	-0.01748		3355.7	-0.01748
3355.22	-0.00207		3355.22	-0.00278		3355.22	-0.01726		3355.22	-0.01726
3354.74	-0.00215		3354.74	-0.00302		3354.74	-0.01719		3354.74	-0.01719
3354.26	-0.00217		3354.26	-0.00298		3354.26	-0.01715		3354.26	-0.01715
3353.77	-0.0019		3353.77	-0.00281		3353.77	-0.01704		3353.77	-0.01704
3353.29	-0.00167		3353.29	-0.00263		3353.29	-0.01703		3353.29	-0.01703
3352.81	-0.00186		3352.81	-0.0025		3352.81	-0.01711		3352.81	-0.01711
3352.33	-0.00194		3352.33	-0.00242		3352.33	-0.01727		3352.33	-0.01727
3351.85	-0.00191		3351.85	-0.00253		3351.85	-0.01738		3351.85	-0.01738
3351.36	-0.0019		3351.36	-0.00268		3351.36	-0.01748		3351.36	-0.01748
3350.88	-0.00173		3350.88	-0.00287		3350.88	-0.01748		3350.88	-0.01748
3350.4	-0.0016		3350.4	-0.00314		3350.4	-0.0172		3350.4	-0.0172
3349.92	-0.00151		3349.92	-0.00314		3349.92	-0.01717		3349.92	-0.01717
3349.43	-0.0015		3349.43	-0.00293		3349.43	-0.01754		3349.43	-0.01754
3348.95	-0.00156		3348.95	-0.003		3348.95	-0.01765		3348.95	-0.01765
3348.47	-0.00167		3348.47	-0.00296		3348.47	-0.01741		3348.47	-0.01741
3347.99	-0.00173		3347.99	-0.00259		3347.99	-0.01719		3347.99	-0.01719
3347.51	-0.00162		3347.51	-0.00264		3347.51	-0.01717		3347.51	-0.01717
3347.02	-0.00165		3347.02	-0.00298		3347.02	-0.0174		3347.02	-0.0174
3346.54	-0.00168		3346.54	-0.0032		3346.54	-0.01757		3346.54	-0.01757
3346.06	-0.00161		3346.06	-0.00315		3346.06	-0.01742		3346.06	-0.01742
3345.58	-0.00163		3345.58	-0.00283		3345.58	-0.01724		3345.58	-0.01724
3345.1	-0.00158		3345.1	-0.00281		3345.1	-0.01736		3345.1	-0.01736
3344.61	-0.00143		3344.61	-0.00285		3344.61	-0.01755		3344.61	-0.01755
3344.13	-0.00131		3344.13	-0.00273		3344.13	-0.01735		3344.13	-0.01735
3343.65	-0.00133		3343.65	-0.00265		3343.65	-0.01694		3343.65	-0.01694
3343.17	-0.00134		3343.17	-0.0026		3343.17	-0.01685		3343.17	-0.01685
3342.68	-0.00137		3342.68	-0.0029		3342.68	-0.01704		3342.68	-0.01704
3342.2	-0.00141		3342.2	-0.00318		3342.2	-0.01723		3342.2	-0.01723
3341.72	-0.00133		3341.72	-0.00297		3341.72	-0.01741		3341.72	-0.01741
3341.24	-0.00126		3341.24	-0.00283		3341.24	-0.01736		3341.24	-0.01736
3340.76	-0.0012		3340.76	-0.00294		3340.76	-0.01715		3340.76	-0.01715
3340.27	-0.00125		3340.27	-0.00306		3340.27	-0.0172		3340.27	-0.0172
3339.79	-0.00146		3339.79	-0.00323		3339.79	-0.01745		3339.79	-0.01745
3339.31	-0.00161		3339.31	-0.00316		3339.31	-0.01765		3339.31	-0.01765
3338.83	-0.00159		3338.83	-0.00272		3338.83	-0.01756		3338.83	-0.01756
3338.35	-0.00142		3338.35	-0.00268		3338.35	-0.01717		3338.35	-0.01717
3337.86	-0.00135		3337.86	-0.00303		3337.86	-0.01706		3337.86	-0.01706
3337.38	-0.00135		3337.38	-0.00298		3337.38	-0.01733		3337.38	-0.01733
3336.9	-0.00129		3336.9	-0.00282		3336.9	-0.01741		3336.9	-0.01741
3336.42	-0.0013		3336.42	-0.00289		3336.42	-0.01741		3336.42	-0.01741
3335.93	-0.00133		3335.93	-0.00306		3335.93	-0.01757		3335.93	-0.01757
3335.45	-0.00124		3335.45	-0.00334		3335.45	-0.01772		3335.45	-0.01772
3334.97	-0.00121		3334.97	-0.00345		3334.97	-0.01775		3334.97	-0.01775
3334.49	-0.00125		3334.49	-0.00315		3334.49	-0.01739		3334.49	-0.01739
3334.01	-0.00124		3334.01	-0.00281		3334.01	-0.01712		3334.01	-0.01712
3333.52	-0.00138		3333.52	-0.00273		3333.52	-0.01732		3333.52	-0.01732
3333.04	-0.00148		3333.04	-0.00286		3333.04	-0.01752		3333.04	-0.01752
3332.56	-0.0014		3332.56	-0.00306		3332.56	-0.01753		3332.56	-0.01753
3332.08	-0.00143		3332.08	-0.00307		3332.08	-0.01732		3332.08	-0.01732
3331.6	-0.00146		3331.6	-0.0029		3331.6	-0.01733		3331.6	-0.01733
3331.11	-0.00142		3331.11	-0.00296		3331.11	-0.01748		3331.11	-0.01748
3330.63	-0.00148		3330.63	-0.00308		3330.63	-0.01736		3330.63	-0.01736
3330.15	-0.0017		3330.15	-0.00294		3330.15	-0.01733		3330.15	-0.01733
3329.67	-0.00181		3329.67	-0.0029		3329.67	-0.01738		3329.67	-0.01738
3329.18	-0.00158		3329.18	-0.00286		3329.18	-0.01728		3329.18	-0.01728
3328.7	-0.0015		3328.7	-0.00282		3328.7	-0.01705		3328.7	-0.01705
3328.22	-0.00161		3328.22	-0.00295		3328.22	-0.01692		3328.22	-0.01692
3327.74	-0.00153		3327.74	-0.00307		3327.74	-0.01703		3327.74	-0.01703
3327.26	-0.00158		3327.26	-0.00314		3327.26	-0.01719		3327.26	-0.01719
3326.77	-0.00182		3326.77	-0.00302		3326.77	-0.01733		3326.77	-0.01733
3326.29	-0.00192		3326.29	-0.00275		3326.29	-0.01726		3326.29	-0.01726
3325.81	-0.00194		3325.81	-0.00278		3325.81	-0.01704		3325.81	-0.01704
3325.33	-0.00201		3325.33	-0.0031		3325.33	-0.01693		3325.33	-0.01693
3324.85	-0.00208		3324.85	-0.00319		3324.85	-0.01696		3324.85	-0.01696
3324.36	-0.00203		3324.36	-0.00301		3324.36	-0.01723		3324.36	-0.01723
3323.88	-0.002		3323.88	-0.00303		3323.88	-0.01743		3323.88	-0.01743
3323.4	-0.00206		3323.4	-0.00299		3323.4	-0.01715		3323.4	-0.01715
3322.92	-0.00203		3322.92	-0.00266		3322.92	-0.01692		3322.92	-0.01692
3322.43	-0.002		3322.43	-0.00239		3322.43	-0.01704		3322.43	-0.01704
3321.95	-0.00208		3321.95	-0.00249		3321.95	-0.01718		3321.95	-0.01718
3321.47	-0.00215		3321.47	-0.0027		3321.47	-0.01727		3321.47	-0.01727
3320.99	-0.00197		3320.99	-0.00271		3320.99	-0.01727		3320.99	-0.01727
3320.51	-0.00185		3320.51	-0.00277		3320.51	-0.0173		3320.51	-0.0173
3320.02	-0.00214		3320.02	-0.00288		3320.02	-0.01734		3320.02	-0.01734
3319.54	-0.00228		3319.54	-0.00289		3319.54	-0.0172		3319.54	-0.0172
3319.06	-0.00198		3319.06	-0.00284		3319.06	-0.0171		3319.06	-0.0171
3318.58	-0.00188		3318.58	-0.00287		3318.58	-0.01716		3318.58	-0.01716
3318.1	-0.00217		3318.1	-0.00311		3318.1	-0.01716		3318.1	-0.01716
3317.61	-0.00233		3317.61	-0.0031		3317.61	-0.01702		3317.61	-0.01702
3317.13	-0.00233		3317.13	-0.00279		3317.13	-0.01698		3317.13	-0.01698
3316.65	-0.00211		3316.65	-0.00263		3316.65	-0.01714		3316.65	-0.01714
3316.17	-0.00191		3316.17	-0.00273		3316.17	-0.01725		3316.17	-0.01725
3315.68	-0.00214		3315.68	-0.00288		3315.68	-0.01717		3315.68	-0.01717
3315.2	-0.00223		3315.2	-0.00282		3315.2	-0.01696		3315.2	-0.01696
3314.72	-0.00211		3314.72	-0.00269		3314.72	-0.01698		3314.72	-0.01698
3314.24	-0.0021		3314.24	-0.00256		3314.24	-0.01721		3314.24	-0.01721
3313.76	-0.00207		3313.76	-0.00257		3313.76	-0.01728		3313.76	-0.01728
3313.27	-0.00225		3313.27	-0.00254		3313.27	-0.01716		3313.27	-0.01716
3312.79	-0.00245		3312.79	-0.00248		3312.79	-0.01708		3312.79	-0.01708
3312.31	-0.00229		3312.31	-0.00279		3312.31	-0.01713		3312.31	-0.01713
3311.83	-0.00216		3311.83	-0.00312		3311.83	-0.01723		3311.83	-0.01723
3311.35	-0.00237		3311.35	-0.00318		3311.35	-0.01721		3311.35	-0.01721
3310.86	-0.0027		3310.86	-0.00318		3310.86	-0.01707		3310.86	-0.01707
3310.38	-0.00275		3310.38	-0.00327		3310.38	-0.01709		3310.38	-0.01709
3309.9	-0.00257		3309.9	-0.00321		3309.9	-0.01704		3309.9	-0.01704
3309.42	-0.00248		3309.42	-0.00288		3309.42	-0.0168		3309.42	-0.0168
3308.93	-0.00246		3308.93	-0.00264		3308.93	-0.01689		3308.93	-0.01689
3308.45	-0.00233		3308.45	-0.00252		3308.45	-0.0173		3308.45	-0.0173
3307.97	-0.00227		3307.97	-0.00242		3307.97	-0.01757		3307.97	-0.01757
3307.49	-0.0024		3307.49	-0.00232		3307.49	-0.0174		3307.49	-0.0174
3307.01	-0.00256		3307.01	-0.0023		3307.01	-0.01719		3307.01	-0.01719
3306.52	-0.00271		3306.52	-0.00234		3306.52	-0.01723		3306.52	-0.01723
3306.04	-0.00287		3306.04	-0.00241		3306.04	-0.01745		3306.04	-0.01745
3305.56	-0.00295		3305.56	-0.00259		3305.56	-0.01763		3305.56	-0.01763
3305.08	-0.00284		3305.08	-0.00256		3305.08	-0.01754		3305.08	-0.01754
3304.6	-0.00265		3304.6	-0.00256		3304.6	-0.01747		3304.6	-0.01747
3304.11	-0.00249		3304.11	-0.00262		3304.11	-0.01733		3304.11	-0.01733
3303.63	-0.00238		3303.63	-0.00247		3303.63	-0.01725		3303.63	-0.01725
3303.15	-0.00232		3303.15	-0.00249		3303.15	-0.01738		3303.15	-0.01738
3302.67	-0.00229		3302.67	-0.00253		3302.67	-0.01737		3302.67	-0.01737
3302.18	-0.00227		3302.18	-0.00237		3302.18	-0.01741		3302.18	-0.01741
3301.7	-0.0023		3301.7	-0.00227		3301.7	-0.01742		3301.7	-0.01742
3301.22	-0.00244		3301.22	-0.00248		3301.22	-0.01747		3301.22	-0.01747
3300.74	-0.00243		3300.74	-0.00277		3300.74	-0.01738		3300.74	-0.01738
3300.26	-0.00239		3300.26	-0.00264		3300.26	-0.01704		3300.26	-0.01704
3299.77	-0.00251		3299.77	-0.00251		3299.77	-0.01697		3299.77	-0.01697
3299.29	-0.00242		3299.29	-0.00268		3299.29	-0.01708		3299.29	-0.01708
3298.81	-0.00233		3298.81	-0.00286		3298.81	-0.01727		3298.81	-0.01727
3298.33	-0.00252		3298.33	-0.00282		3298.33	-0.0174		3298.33	-0.0174
3297.85	-0.00262		3297.85	-0.00259		3297.85	-0.01735		3297.85	-0.01735
3297.36	-0.00252		3297.36	-0.00253		3297.36	-0.01724		3297.36	-0.01724
3296.88	-0.00249		3296.88	-0.0025		3296.88	-0.01713		3296.88	-0.01713
3296.4	-0.00248		3296.4	-0.00254		3296.4	-0.01728		3296.4	-0.01728
3295.92	-0.00251		3295.92	-0.00272		3295.92	-0.01752		3295.92	-0.01752
3295.43	-0.00257		3295.43	-0.00258		3295.43	-0.0176		3295.43	-0.0176
3294.95	-0.00246		3294.95	-0.00246		3294.95	-0.01748		3294.95	-0.01748
3294.47	-0.00244		3294.47	-0.00268		3294.47	-0.0173		3294.47	-0.0173
3293.99	-0.0026		3293.99	-0.00269		3293.99	-0.01729		3293.99	-0.01729
3293.51	-0.00267		3293.51	-0.00258		3293.51	-0.01729		3293.51	-0.01729
3293.02	-0.00264		3293.02	-0.00267		3293.02	-0.01723		3293.02	-0.01723
3292.54	-0.00251		3292.54	-0.00273		3292.54	-0.01721		3292.54	-0.01721
3292.06	-0.0024		3292.06	-0.00256		3292.06	-0.01741		3292.06	-0.01741
3291.58	-0.0024		3291.58	-0.00246		3291.58	-0.01743		3291.58	-0.01743
3291.1	-0.00257		3291.1	-0.00256		3291.1	-0.01714		3291.1	-0.01714
3290.61	-0.00275		3290.61	-0.00253		3290.61	-0.017		3290.61	-0.017
3290.13	-0.00263		3290.13	-0.00237		3290.13	-0.01706		3290.13	-0.01706
3289.65	-0.00236		3289.65	-0.00243		3289.65	-0.01717		3289.65	-0.01717
3289.17	-0.00211		3289.17	-0.00252		3289.17	-0.01719		3289.17	-0.01719
3288.68	-0.00203		3288.68	-0.00246		3288.68	-0.01732		3288.68	-0.01732
3288.2	-0.00212		3288.2	-0.00259		3288.2	-0.0174		3288.2	-0.0174
3287.72	-0.00217		3287.72	-0.00292		3287.72	-0.01711		3287.72	-0.01711
3287.24	-0.0022		3287.24	-0.00293		3287.24	-0.01692		3287.24	-0.01692
3286.76	-0.00222		3286.76	-0.00265		3286.76	-0.01718		3286.76	-0.01718
3286.27	-0.00219		3286.27	-0.00254		3286.27	-0.01744		3286.27	-0.01744
3285.79	-0.00223		3285.79	-0.00255		3285.79	-0.01722		3285.79	-0.01722
3285.31	-0.00245		3285.31	-0.00251		3285.31	-0.01697		3285.31	-0.01697
3284.83	-0.0026		3284.83	-0.00236		3284.83	-0.01707		3284.83	-0.01707
3284.35	-0.00239		3284.35	-0.00225		3284.35	-0.01704		3284.35	-0.01704
3283.86	-0.00201		3283.86	-0.00239		3283.86	-0.01693		3283.86	-0.01693
3283.38	-0.00191		3283.38	-0.00266		3283.38	-0.01707		3283.38	-0.01707
3282.9	-0.00214		3282.9	-0.00272		3282.9	-0.01709		3282.9	-0.01709
3282.42	-0.00225		3282.42	-0.0027		3282.42	-0.01696		3282.42	-0.01696
3281.93	-0.00208		3281.93	-0.00267		3281.93	-0.01703		3281.93	-0.01703
3281.45	-0.00193		3281.45	-0.00247		3281.45	-0.01717		3281.45	-0.01717
3280.97	-0.00206		3280.97	-0.00244		3280.97	-0.0172		3280.97	-0.0172
3280.49	-0.00222		3280.49	-0.00249		3280.49	-0.01708		3280.49	-0.01708
3280.01	-0.00227		3280.01	-0.00255		3280.01	-0.01698		3280.01	-0.01698
3279.52	-0.00234		3279.52	-0.0028		3279.52	-0.01713		3279.52	-0.01713
3279.04	-0.00225		3279.04	-0.00291		3279.04	-0.01718		3279.04	-0.01718
3278.56	-0.00193		3278.56	-0.00289		3278.56	-0.01703		3278.56	-0.01703
3278.08	-0.00189		3278.08	-0.00282		3278.08	-0.01701		3278.08	-0.01701
3277.6	-0.00219		3277.6	-0.00273		3277.6	-0.01715		3277.6	-0.01715
3277.11	-0.00223		3277.11	-0.00271		3277.11	-0.01716		3277.11	-0.01716
3276.63	-0.00211		3276.63	-0.00267		3276.63	-0.01697		3276.63	-0.01697
3276.15	-0.00211		3276.15	-0.00273		3276.15	-0.0168		3276.15	-0.0168
3275.67	-0.00206		3275.67	-0.00278		3275.67	-0.01674		3275.67	-0.01674
3275.18	-0.0019		3275.18	-0.0028		3275.18	-0.01668		3275.18	-0.01668
3274.7	-0.00182		3274.7	-0.00266		3274.7	-0.01653		3274.7	-0.01653
3274.22	-0.00193		3274.22	-0.00242		3274.22	-0.01663		3274.22	-0.01663
3273.74	-0.00194		3273.74	-0.00254		3273.74	-0.0169		3273.74	-0.0169
3273.26	-0.0018		3273.26	-0.00282		3273.26	-0.01703		3273.26	-0.01703
3272.77	-0.00185		3272.77	-0.00288		3272.77	-0.01711		3272.77	-0.01711
3272.29	-0.00197		3272.29	-0.00273		3272.29	-0.01712		3272.29	-0.01712
3271.81	-0.00215		3271.81	-0.00247		3271.81	-0.01704		3271.81	-0.01704
3271.33	-0.00218		3271.33	-0.00234		3271.33	-0.01675		3271.33	-0.01675
3270.85	-0.00199		3270.85	-0.00245		3270.85	-0.01649		3270.85	-0.01649
3270.36	-0.00191		3270.36	-0.00265		3270.36	-0.01648		3270.36	-0.01648
3269.88	-0.00189		3269.88	-0.00266		3269.88	-0.01675		3269.88	-0.01675
3269.4	-0.00198		3269.4	-0.00262		3269.4	-0.01713		3269.4	-0.01713
3268.92	-0.00211		3268.92	-0.00279		3268.92	-0.01708		3268.92	-0.01708
3268.43	-0.00214		3268.43	-0.00295		3268.43	-0.01685		3268.43	-0.01685
3267.95	-0.00225		3267.95	-0.00268		3267.95	-0.01671		3267.95	-0.01671
3267.47	-0.00235		3267.47	-0.00225		3267.47	-0.01675		3267.47	-0.01675
3266.99	-0.00225		3266.99	-0.00241		3266.99	-0.01697		3266.99	-0.01697
3266.51	-0.00193		3266.51	-0.0028		3266.51	-0.01695		3266.51	-0.01695
3266.02	-0.00178		3266.02	-0.00265		3266.02	-0.01696		3266.02	-0.01696
3265.54	-0.00187		3265.54	-0.00251		3265.54	-0.017		3265.54	-0.017
3265.06	-0.00205		3265.06	-0.00259		3265.06	-0.01696		3265.06	-0.01696
3264.58	-0.00225		3264.58	-0.00242		3264.58	-0.01709		3264.58	-0.01709
3264.1	-0.00215		3264.1	-0.00233		3264.1	-0.01714		3264.1	-0.01714
3263.61	-0.00201		3263.61	-0.00243		3263.61	-0.01705		3263.61	-0.01705
3263.13	-0.00186		3263.13	-0.00237		3263.13	-0.01695		3263.13	-0.01695
3262.65	-0.00167		3262.65	-0.0024		3262.65	-0.01695		3262.65	-0.01695
3262.17	-0.00176		3262.17	-0.00258		3262.17	-0.01693		3262.17	-0.01693
3261.68	-0.00184		3261.68	-0.00284		3261.68	-0.01687		3261.68	-0.01687
3261.2	-0.00198		3261.2	-0.00292		3261.2	-0.01687		3261.2	-0.01687
3260.72	-0.00214		3260.72	-0.00256		3260.72	-0.01686		3260.72	-0.01686
3260.24	-0.00205		3260.24	-0.00234		3260.24	-0.01679		3260.24	-0.01679
3259.76	-0.002		3259.76	-0.00248		3259.76	-0.01673		3259.76	-0.01673
3259.27	-0.00194		3259.27	-0.00267		3259.27	-0.01672		3259.27	-0.01672
3258.79	-0.0018		3258.79	-0.00276		3258.79	-0.01673		3258.79	-0.01673
3258.31	-0.00183		3258.31	-0.00293		3258.31	-0.01686		3258.31	-0.01686
3257.83	-0.00191		3257.83	-0.00311		3257.83	-0.01683		3257.83	-0.01683
3257.35	-0.00175		3257.35	-0.00273		3257.35	-0.01651		3257.35	-0.01651
3256.86	-0.00158		3256.86	-0.00235		3256.86	-0.01658		3256.86	-0.01658
3256.38	-0.00159		3256.38	-0.00227		3256.38	-0.01697		3256.38	-0.01697
3255.9	-0.00149		3255.9	-0.00219		3255.9	-0.01705		3255.9	-0.01705
3255.42	-0.00154		3255.42	-0.00226		3255.42	-0.01692		3255.42	-0.01692
3254.93	-0.00177		3254.93	-0.00225		3254.93	-0.01685		3254.93	-0.01685
3254.45	-0.00172		3254.45	-0.00225		3254.45	-0.0167		3254.45	-0.0167
3253.97	-0.00164		3253.97	-0.00242		3253.97	-0.0167		3253.97	-0.0167
3253.49	-0.00174		3253.49	-0.00248		3253.49	-0.01681		3253.49	-0.01681
3253.01	-0.00172		3253.01	-0.00256		3253.01	-0.0167		3253.01	-0.0167
3252.52	-0.00164		3252.52	-0.00264		3252.52	-0.0166		3252.52	-0.0166
3252.04	-0.00157		3252.04	-0.00259		3252.04	-0.01662		3252.04	-0.01662
3251.56	-0.00145		3251.56	-0.0024		3251.56	-0.01679		3251.56	-0.01679
3251.08	-0.00148		3251.08	-0.00239		3251.08	-0.01706		3251.08	-0.01706
3250.6	-0.00157		3250.6	-0.00258		3250.6	-0.01705		3250.6	-0.01705
3250.11	-0.00151		3250.11	-0.00261		3250.11	-0.01692		3250.11	-0.01692
3249.63	-0.0014		3249.63	-0.00257		3249.63	-0.01689		3249.63	-0.01689
3249.15	-0.0013		3249.15	-0.00248		3249.15	-0.01688		3249.15	-0.01688
3248.67	-0.00118		3248.67	-0.00235		3248.67	-0.01676		3248.67	-0.01676
3248.18	-0.0012		3248.18	-0.00239		3248.18	-0.01662		3248.18	-0.01662
3247.7	-0.00137		3247.7	-0.00239		3247.7	-0.01658		3247.7	-0.01658
3247.22	-0.00158		3247.22	-0.00237		3247.22	-0.01663		3247.22	-0.01663
3246.74	-0.00173		3246.74	-0.00235		3246.74	-0.01658		3246.74	-0.01658
3246.26	-0.00147		3246.26	-0.00233		3246.26	-0.01652		3246.26	-0.01652
3245.77	-0.00096		3245.77	-0.00254		3245.77	-0.01667		3245.77	-0.01667
3245.29	-0.00085		3245.29	-0.00261		3245.29	-0.01681		3245.29	-0.01681
3244.81	-0.00119		3244.81	-0.00248		3244.81	-0.01681		3244.81	-0.01681
3244.33	-0.00154		3244.33	-0.00257		3244.33	-0.01674		3244.33	-0.01674
3243.85	-0.00157		3243.85	-0.00262		3243.85	-0.01663		3243.85	-0.01663
3243.36	-0.00139		3243.36	-0.00251		3243.36	-0.01664		3243.36	-0.01664
3242.88	-0.00129		3242.88	-0.00236		3242.88	-0.01671		3242.88	-0.01671
3242.4	-0.00129		3242.4	-0.00233		3242.4	-0.01669		3242.4	-0.01669
3241.92	-0.00128		3241.92	-0.00258		3241.92	-0.01659		3241.92	-0.01659
3241.43	-0.00128		3241.43	-0.0027		3241.43	-0.01664		3241.43	-0.01664
3240.95	-0.0013		3240.95	-0.00262		3240.95	-0.01665		3240.95	-0.01665
3240.47	-0.00113		3240.47	-0.00272		3240.47	-0.01638		3240.47	-0.01638
3239.99	-0.00088		3239.99	-0.0027		3239.99	-0.01635		3239.99	-0.01635
3239.51	-0.00089		3239.51	-0.0025		3239.51	-0.01671		3239.51	-0.01671
3239.02	-0.00092		3239.02	-0.00244		3239.02	-0.01702		3239.02	-0.01702
3238.54	-0.00082		3238.54	-0.00226		3238.54	-0.01681		3238.54	-0.01681
3238.06	-0.00081		3238.06	-0.00216		3238.06	-0.0164		3238.06	-0.0164
3237.58	-0.00097		3237.58	-0.00234		3237.58	-0.01635		3237.58	-0.01635
3237.1	-0.00098		3237.1	-0.00254		3237.1	-0.01647		3237.1	-0.01647
3236.61	-0.0008		3236.61	-0.00286		3236.61	-0.01654		3236.61	-0.01654
3236.13	-0.00083		3236.13	-0.00292		3236.13	-0.0163		3236.13	-0.0163
3235.65	-0.00091		3235.65	-0.00252		3235.65	-0.01608		3235.65	-0.01608
3235.17	-0.00072		3235.17	-0.00244		3235.17	-0.01636		3235.17	-0.01636
3234.68	-0.00048		3234.68	-0.00271		3234.68	-0.0165		3234.68	-0.0165
3234.2	-0.00044		3234.2	-0.00285		3234.2	-0.01623		3234.2	-0.01623
3233.72	-0.00041		3233.72	-0.00277		3233.72	-0.01614		3233.72	-0.01614
3233.24	-0.00037		3233.24	-0.00262		3233.24	-0.01638		3233.24	-0.01638
3232.76	-0.00041		3232.76	-0.00254		3232.76	-0.01657		3232.76	-0.01657
3232.27	-0.0004		3232.27	-0.00242		3232.27	-0.01671		3232.27	-0.01671
3231.79	-0.00028		3231.79	-0.00233		3231.79	-0.01687		3231.79	-0.01687
3231.31	-0.00019		3231.31	-0.00243		3231.31	-0.01696		3231.31	-0.01696
3230.83	-0.0002		3230.83	-0.00255		3230.83	-0.01696		3230.83	-0.01696
3230.35	-7e-05		3230.35	-0.00263		3230.35	-0.01673		3230.35	-0.01673
3229.86	0.00019		3229.86	-0.00281		3229.86	-0.01637		3229.86	-0.01637
3229.38	0.00035		3229.38	-0.00283		3229.38	-0.01634		3229.38	-0.01634
3228.9	0.00047		3228.9	-0.00254		3228.9	-0.01668		3228.9	-0.01668
3228.42	0.00048		3228.42	-0.00237		3228.42	-0.01675		3228.42	-0.01675
3227.93	0.0004		3227.93	-0.00249		3227.93	-0.01654		3227.93	-0.01654
3227.45	0.00037		3227.45	-0.00268		3227.45	-0.01654		3227.45	-0.01654
3226.97	0.00052		3226.97	-0.00263		3226.97	-0.01646		3226.97	-0.01646
3226.49	0.00065		3226.49	-0.00249		3226.49	-0.01639		3226.49	-0.01639
3226.01	0.00063		3226.01	-0.00257		3226.01	-0.01638		3226.01	-0.01638
3225.52	0.00077		3225.52	-0.00269		3225.52	-0.01622		3225.52	-0.01622
3225.04	0.00091		3225.04	-0.00263		3225.04	-0.01624		3225.04	-0.01624
3224.56	0.00085		3224.56	-0.00244		3224.56	-0.01633		3224.56	-0.01633
3224.08	0.00085		3224.08	-0.00222		3224.08	-0.01642		3224.08	-0.01642
3223.6	0.00104		3223.6	-0.00219		3223.6	-0.01668		3223.6	-0.01668
3223.11	0.00133		3223.11	-0.00245		3223.11	-0.01668		3223.11	-0.01668
3222.63	0.00134		3222.63	-0.00272		3222.63	-0.01651		3222.63	-0.01651
3222.15	0.00123		3222.15	-0.0027		3222.15	-0.01655		3222.15	-0.01655
3221.67	0.00129		3221.67	-0.00266		3221.67	-0.01652		3221.67	-0.01652
3221.18	0.00132		3221.18	-0.00269		3221.18	-0.01642		3221.18	-0.01642
3220.7	0.00128		3220.7	-0.0026		3220.7	-0.01647		3220.7	-0.01647
3220.22	0.00132		3220.22	-0.00256		3220.22	-0.01651		3220.22	-0.01651
3219.74	0.00158		3219.74	-0.00265		3219.74	-0.01641		3219.74	-0.01641
3219.26	0.00181		3219.26	-0.00275		3219.26	-0.01612		3219.26	-0.01612
3218.77	0.00175		3218.77	-0.00251		3218.77	-0.01601		3218.77	-0.01601
3218.29	0.00165		3218.29	-0.0022		3218.29	-0.01619		3218.29	-0.01619
3217.81	0.00176		3217.81	-0.00244		3217.81	-0.01626		3217.81	-0.01626
3217.33	0.00192		3217.33	-0.00263		3217.33	-0.01614		3217.33	-0.01614
3216.85	0.00191		3216.85	-0.00237		3216.85	-0.01603		3216.85	-0.01603
3216.36	0.00186		3216.36	-0.00224		3216.36	-0.01612		3216.36	-0.01612
3215.88	0.00181		3215.88	-0.00251		3215.88	-0.01627		3215.88	-0.01627
3215.4	0.00186		3215.4	-0.00273		3215.4	-0.01633		3215.4	-0.01633
3214.92	0.00204		3214.92	-0.00266		3214.92	-0.0165		3214.92	-0.0165
3214.43	0.00212		3214.43	-0.00278		3214.43	-0.01654		3214.43	-0.01654
3213.95	0.00215		3213.95	-0.00283		3213.95	-0.01636		3213.95	-0.01636
3213.47	0.0022		3213.47	-0.00267		3213.47	-0.01622		3213.47	-0.01622
3212.99	0.00223		3212.99	-0.00244		3212.99	-0.01615		3212.99	-0.01615
3212.51	0.00232		3212.51	-0.00197		3212.51	-0.01618		3212.51	-0.01618
3212.02	0.00219		3212.02	-0.00186		3212.02	-0.0164		3212.02	-0.0164
3211.54	0.00183		3211.54	-0.00231		3211.54	-0.0166		3211.54	-0.0166
3211.06	0.00167		3211.06	-0.00261		3211.06	-0.01653		3211.06	-0.01653
3210.58	0.00181		3210.58	-0.00251		3210.58	-0.01643		3210.58	-0.01643
3210.1	0.00214		3210.1	-0.00232		3210.1	-0.01627		3210.1	-0.01627
3209.61	0.00232		3209.61	-0.00224		3209.61	-0.01617		3209.61	-0.01617
3209.13	0.00219		3209.13	-0.00226		3209.13	-0.01629		3209.13	-0.01629
3208.65	0.002		3208.65	-0.00243		3208.65	-0.01634		3208.65	-0.01634
3208.17	0.00192		3208.17	-0.0026		3208.17	-0.01653		3208.17	-0.01653
3207.68	0.002		3207.68	-0.00258		3207.68	-0.01663		3207.68	-0.01663
3207.2	0.00203		3207.2	-0.00234		3207.2	-0.01628		3207.2	-0.01628
3206.72	0.00195		3206.72	-0.00221		3206.72	-0.01604		3206.72	-0.01604
3206.24	0.00203		3206.24	-0.00258		3206.24	-0.01629		3206.24	-0.01629
3205.76	0.00233		3205.76	-0.0028		3205.76	-0.01647		3205.76	-0.01647
3205.27	0.00257		3205.27	-0.00256		3205.27	-0.01633		3205.27	-0.01633
3204.79	0.00251		3204.79	-0.0023		3204.79	-0.01627		3204.79	-0.01627
3204.31	0.00251		3204.31	-0.0023		3204.31	-0.0162		3204.31	-0.0162
3203.83	0.00268		3203.83	-0.00237		3203.83	-0.01601		3203.83	-0.01601
3203.35	0.00278		3203.35	-0.00226		3203.35	-0.01589		3203.35	-0.01589
3202.86	0.00285		3202.86	-0.00221		3202.86	-0.01607		3202.86	-0.01607
3202.38	0.00285		3202.38	-0.00213		3202.38	-0.0164		3202.38	-0.0164
3201.9	0.00276		3201.9	-0.00205		3201.9	-0.01633		3201.9	-0.01633
3201.42	0.00268		3201.42	-0.00216		3201.42	-0.01604		3201.42	-0.01604
3200.93	0.0029		3200.93	-0.00223		3200.93	-0.01579		3200.93	-0.01579
3200.45	0.00337		3200.45	-0.00207		3200.45	-0.01573		3200.45	-0.01573
3199.97	0.00352		3199.97	-0.00192		3199.97	-0.01588		3199.97	-0.01588
3199.49	0.00353		3199.49	-0.00217		3199.49	-0.01582		3199.49	-0.01582
3199.01	0.0038		3199.01	-0.00233		3199.01	-0.01578		3199.01	-0.01578
3198.52	0.00402		3198.52	-0.00221		3198.52	-0.01589		3198.52	-0.01589
3198.04	0.00411		3198.04	-0.00218		3198.04	-0.01583		3198.04	-0.01583
3197.56	0.00412		3197.56	-0.00214		3197.56	-0.01579		3197.56	-0.01579
3197.08	0.00394		3197.08	-0.0021		3197.08	-0.0159		3197.08	-0.0159
3196.6	0.00394		3196.6	-0.00216		3196.6	-0.0161		3196.6	-0.0161
3196.11	0.00414		3196.11	-0.00229		3196.11	-0.01636		3196.11	-0.01636
3195.63	0.00422		3195.63	-0.00235		3195.63	-0.01644		3195.63	-0.01644
3195.15	0.00444		3195.15	-0.00227		3195.15	-0.01615		3195.15	-0.01615
3194.67	0.00479		3194.67	-0.00215		3194.67	-0.01583		3194.67	-0.01583
3194.18	0.00495		3194.18	-0.00194		3194.18	-0.01576		3194.18	-0.01576
3193.7	0.00496		3193.7	-0.00192		3193.7	-0.01565		3193.7	-0.01565
3193.22	0.00486		3193.22	-0.00205		3193.22	-0.01534		3193.22	-0.01534
3192.74	0.0048		3192.74	-0.00214		3192.74	-0.01511		3192.74	-0.01511
3192.26	0.00475		3192.26	-0.00234		3192.26	-0.01517		3192.26	-0.01517
3191.77	0.00478		3191.77	-0.00222		3191.77	-0.01526		3191.77	-0.01526
3191.29	0.00496		3191.29	-0.0018		3191.29	-0.01538		3191.29	-0.01538
3190.81	0.00511		3190.81	-0.0016		3190.81	-0.01566		3190.81	-0.01566
3190.33	0.0052		3190.33	-0.00161		3190.33	-0.01585		3190.33	-0.01585
3189.85	0.00518		3189.85	-0.0017		3189.85	-0.01579		3189.85	-0.01579
3189.36	0.00515		3189.36	-0.00181		3189.36	-0.01569		3189.36	-0.01569
3188.88	0.00512		3188.88	-0.00179		3188.88	-0.01581		3188.88	-0.01581
3188.4	0.00496		3188.4	-0.00167		3188.4	-0.01589		3188.4	-0.01589
3187.92	0.00503		3187.92	-0.00165		3187.92	-0.01576		3187.92	-0.01576
3187.43	0.00519		3187.43	-0.00175		3187.43	-0.01576		3187.43	-0.01576
3186.95	0.00513		3186.95	-0.0017		3186.95	-0.01571		3186.95	-0.01571
3186.47	0.0049		3186.47	-0.00163		3186.47	-0.0156		3186.47	-0.0156
3185.99	0.00461		3185.99	-0.00169		3185.99	-0.01561		3185.99	-0.01561
3185.51	0.00452		3185.51	-0.00177		3185.51	-0.01559		3185.51	-0.01559
3185.02	0.00445		3185.02	-0.00185		3185.02	-0.01564		3185.02	-0.01564
3184.54	0.00414		3184.54	-0.00192		3184.54	-0.0157		3184.54	-0.0157
3184.06	0.00385		3184.06	-0.00184		3184.06	-0.01569		3184.06	-0.01569
3183.58	0.00394		3183.58	-0.00158		3183.58	-0.01557		3183.58	-0.01557
3183.1	0.00397		3183.1	-0.00134		3183.1	-0.01549		3183.1	-0.01549
3182.61	0.00372		3182.61	-0.00116		3182.61	-0.01572		3182.61	-0.01572
3182.13	0.00375		3182.13	-0.00093		3182.13	-0.01586		3182.13	-0.01586
3181.65	0.00372		3181.65	-0.00075		3181.65	-0.01557		3181.65	-0.01557
3181.17	0.00346		3181.17	-0.00085		3181.17	-0.01516		3181.17	-0.01516
3180.68	0.00334		3180.68	-0.00111		3180.68	-0.01491		3180.68	-0.01491
3180.2	0.00327		3180.2	-0.00125		3180.2	-0.01482		3180.2	-0.01482
3179.72	0.00306		3179.72	-0.00113		3179.72	-0.0149		3179.72	-0.0149
3179.24	0.00272		3179.24	-0.00097		3179.24	-0.01526		3179.24	-0.01526
3178.76	0.00251		3178.76	-0.00106		3178.76	-0.01549		3178.76	-0.01549
3178.27	0.00237		3178.27	-0.00106		3178.27	-0.01542		3178.27	-0.01542
3177.79	0.00224		3177.79	-0.0009		3177.79	-0.01537		3177.79	-0.01537
3177.31	0.00214		3177.31	-0.0007		3177.31	-0.0154		3177.31	-0.0154
3176.83	0.00202		3176.83	-0.0004		3176.83	-0.01551		3176.83	-0.01551
3176.35	0.00192		3176.35	-0.00061		3176.35	-0.01553		3176.35	-0.01553
3175.86	0.00187		3175.86	-0.00087		3175.86	-0.01556		3175.86	-0.01556
3175.38	0.0019		3175.38	-0.0005		3175.38	-0.01569		3175.38	-0.01569
3174.9	0.00176		3174.9	-0.00012		3174.9	-0.01571		3174.9	-0.01571
3174.42	0.00144		3174.42	-0.00013		3174.42	-0.01564		3174.42	-0.01564
3173.93	0.00117		3173.93	-0.00031		3173.93	-0.01548		3173.93	-0.01548
3173.45	0.00078		3173.45	-0.00033		3173.45	-0.01528		3173.45	-0.01528
3172.97	0.00053		3172.97	-0.00022		3172.97	-0.01531		3172.97	-0.01531
3172.49	0.00051		3172.49	-5e-05		3172.49	-0.01543		3172.49	-0.01543
3172.01	0.00054		3172.01	0.00012		3172.01	-0.01527		3172.01	-0.01527
3171.52	0.00047		3171.52	-6e-05		3171.52	-0.0151		3171.52	-0.0151
3171.04	0.00027		3171.04	-0.00013		3171.04	-0.01519		3171.04	-0.01519
3170.56	0.00015		3170.56	0.00029		3170.56	-0.01538		3170.56	-0.01538
3170.08	9e-05		3170.08	0.00056		3170.08	-0.01556		3170.08	-0.01556
3169.6	0.0002		3169.6	0.00038		3169.6	-0.01542		3169.6	-0.01542
3169.11	0.00027		3169.11	0.00041		3169.11	-0.01515		3169.11	-0.01515
3168.63	0.0001		3168.63	0.00056		3168.63	-0.01517		3168.63	-0.01517
3168.15	-7e-05		3168.15	0.00042		3168.15	-0.01524		3168.15	-0.01524
3167.67	-0.00017		3167.67	0.00069		3167.67	-0.01528		3167.67	-0.01528
3167.18	-0.00022		3167.18	0.00117		3167.18	-0.0154		3167.18	-0.0154
3166.7	-0.00018		3166.7	0.00126		3166.7	-0.01557		3166.7	-0.01557
3166.22	-0.00012		3166.22	0.00126		3166.22	-0.01548		3166.22	-0.01548
3165.74	-0.00024		3165.74	0.00132		3165.74	-0.01518		3165.74	-0.01518
3165.26	-0.00032		3165.26	0.0015		3165.26	-0.01504		3165.26	-0.01504
3164.77	-0.00032		3164.77	0.00161		3164.77	-0.0148		3164.77	-0.0148
3164.29	-0.00035		3164.29	0.0017		3164.29	-0.01456		3164.29	-0.01456
3163.81	-0.00025		3163.81	0.00211		3163.81	-0.01473		3163.81	-0.01473
3163.33	-0.00025		3163.33	0.0026		3163.33	-0.01502		3163.33	-0.01502
3162.85	-0.00048		3162.85	0.00275		3162.85	-0.01512		3162.85	-0.01512
3162.36	-0.00054		3162.36	0.00283		3162.36	-0.01518		3162.36	-0.01518
3161.88	-0.0005		3161.88	0.00336		3161.88	-0.01514		3161.88	-0.01514
3161.4	-0.00067		3161.4	0.00417		3161.4	-0.01493		3161.4	-0.01493
3160.92	-0.00082		3160.92	0.00479		3160.92	-0.01496		3160.92	-0.01496
3160.43	-0.00075		3160.43	0.00462		3160.43	-0.01508		3160.43	-0.01508
3159.95	-0.00068		3159.95	0.00405		3159.95	-0.01502		3159.95	-0.01502
3159.47	-0.00072		3159.47	0.00392		3159.47	-0.01506		3159.47	-0.01506
3158.99	-0.00076		3158.99	0.00407		3158.99	-0.01508		3158.99	-0.01508
3158.51	-0.00078		3158.51	0.00434		3158.51	-0.01505		3158.51	-0.01505
3158.02	-0.00083		3158.02	0.00445		3158.02	-0.01508		3158.02	-0.01508
3157.54	-0.00085		3157.54	0.00459		3157.54	-0.01494		3157.54	-0.01494
3157.06	-0.0009		3157.06	0.0051		3157.06	-0.01469		3157.06	-0.01469
3156.58	-0.00088		3156.58	0.00529		3156.58	-0.01459		3156.58	-0.01459
3156.1	-0.0007		3156.1	0.00515		3156.1	-0.01463		3156.1	-0.01463
3155.61	-0.00075		3155.61	0.00518		3155.61	-0.01464		3155.61	-0.01464
3155.13	-0.00088		3155.13	0.00545		3155.13	-0.01467		3155.13	-0.01467
3154.65	-0.00076		3154.65	0.00577		3154.65	-0.01471		3154.65	-0.01471
3154.17	-0.0008		3154.17	0.00591		3154.17	-0.01468		3154.17	-0.01468
3153.69	-0.00109		3153.69	0.00613		3153.69	-0.01478		3153.69	-0.01478
3153.2	-0.00119		3153.2	0.00645		3153.2	-0.01476		3153.2	-0.01476
3152.72	-0.00101		3152.72	0.00662		3152.72	-0.01438		3152.72	-0.01438
3152.24	-0.0009		3152.24	0.00676		3152.24	-0.01426		3152.24	-0.01426
3151.76	-0.00089		3151.76	0.00703		3151.76	-0.01454		3151.76	-0.01454
3151.27	-0.00086		3151.27	0.0074		3151.27	-0.0147		3151.27	-0.0147
3150.79	-0.00094		3150.79	0.00758		3150.79	-0.01451		3150.79	-0.01451
3150.31	-0.00096		3150.31	0.00764		3150.31	-0.01417		3150.31	-0.01417
3149.83	-0.00087		3149.83	0.00787		3149.83	-0.01396		3149.83	-0.01396
3149.35	-0.00092		3149.35	0.00834		3149.35	-0.01391		3149.35	-0.01391
3148.86	-0.00099		3148.86	0.00878		3148.86	-0.01389		3148.86	-0.01389
3148.38	-0.00089		3148.38	0.00891		3148.38	-0.01384		3148.38	-0.01384
3147.9	-0.00078		3147.9	0.00898		3147.9	-0.01392		3147.9	-0.01392
3147.42	-0.00088		3147.42	0.00916		3147.42	-0.01415		3147.42	-0.01415
3146.94	-0.00107		3146.94	0.00943		3146.94	-0.01431		3146.94	-0.01431
3146.45	-0.00107		3146.45	0.0098		3146.45	-0.01429		3146.45	-0.01429
3145.97	-0.00101		3145.97	0.01015		3145.97	-0.01437		3145.97	-0.01437
3145.49	-0.00093		3145.49	0.01062		3145.49	-0.01454		3145.49	-0.01454
3145.01	-0.00082		3145.01	0.01108		3145.01	-0.01452		3145.01	-0.01452
3144.52	-0.00088		3144.52	0.01131		3144.52	-0.01445		3144.52	-0.01445
3144.04	-0.00106		3144.04	0.01168		3144.04	-0.01443		3144.04	-0.01443
3143.56	-0.00115		3143.56	0.01233		3143.56	-0.01444		3143.56	-0.01444
3143.08	-0.00102		3143.08	0.01307		3143.08	-0.01444		3143.08	-0.01444
3142.6	-0.0009		3142.6	0.01402		3142.6	-0.01435		3142.6	-0.01435
3142.11	-0.00091		3142.11	0.01508		3142.11	-0.01434		3142.11	-0.01434
3141.63	-0.00076		3141.63	0.01511		3141.63	-0.01446		3141.63	-0.01446
3141.15	-0.00066		3141.15	0.01428		3141.15	-0.01454		3141.15	-0.01454
3140.67	-0.00073		3140.67	0.0141		3140.67	-0.0144		3140.67	-0.0144
3140.19	-0.00081		3140.19	0.01446		3140.19	-0.01408		3140.19	-0.01408
3139.7	-0.00089		3139.7	0.01497		3139.7	-0.01399		3139.7	-0.01399
3139.22	-0.00095		3139.22	0.01557		3139.22	-0.01416		3139.22	-0.01416
3138.74	-0.00089		3138.74	0.01605		3138.74	-0.01428		3138.74	-0.01428
3138.26	-0.00075		3138.26	0.01658		3138.26	-0.01431		3138.26	-0.01431
3137.77	-0.00075		3137.77	0.01704		3137.77	-0.01433		3137.77	-0.01433
3137.29	-0.00065		3137.29	0.01735		3137.29	-0.01417		3137.29	-0.01417
3136.81	-0.0006		3136.81	0.01773		3136.81	-0.01401		3136.81	-0.01401
3136.33	-0.00083		3136.33	0.01823		3136.33	-0.01411		3136.33	-0.01411
3135.85	-0.00094		3135.85	0.01861		3135.85	-0.01419		3135.85	-0.01419
3135.36	-0.00089		3135.36	0.01906		3135.36	-0.0142		3135.36	-0.0142
3134.88	-0.00085		3134.88	0.01993		3134.88	-0.01406		3134.88	-0.01406
3134.4	-0.00095		3134.4	0.02068		3134.4	-0.01368		3134.4	-0.01368
3133.92	-0.001		3133.92	0.02086		3133.92	-0.01348		3133.92	-0.01348
3133.44	-0.00093		3133.44	0.02083		3133.44	-0.01364		3133.44	-0.01364
3132.95	-0.00101		3132.95	0.02153		3132.95	-0.0138		3132.95	-0.0138
3132.47	-0.00111		3132.47	0.02275		3132.47	-0.01373		3132.47	-0.01373
3131.99	-0.00111		3131.99	0.02349		3131.99	-0.01369		3131.99	-0.01369
3131.51	-0.00104		3131.51	0.0237		3131.51	-0.01375		3131.51	-0.01375
3131.02	-0.00105		3131.02	0.02398		3131.02	-0.0138		3131.02	-0.0138
3130.54	-0.00109		3130.54	0.02485		3130.54	-0.01388		3130.54	-0.01388
3130.06	-0.00095		3130.06	0.02588		3130.06	-0.01395		3130.06	-0.01395
3129.58	-0.0008		3129.58	0.02639		3129.58	-0.01394		3129.58	-0.01394
3129.1	-0.00075		3129.1	0.0263		3129.1	-0.01384		3129.1	-0.01384
3128.61	-0.00076		3128.61	0.02679		3128.61	-0.01379		3128.61	-0.01379
3128.13	-0.00074		3128.13	0.02839		3128.13	-0.01382		3128.13	-0.01382
3127.65	-0.00071		3127.65	0.02956		3127.65	-0.01385		3127.65	-0.01385
3127.17	-0.00073		3127.17	0.02998		3127.17	-0.01397		3127.17	-0.01397
3126.69	-0.00077		3126.69	0.03065		3126.69	-0.01397		3126.69	-0.01397
3126.2	-0.0009		3126.2	0.03213		3126.2	-0.01386		3126.2	-0.01386
3125.72	-0.00101		3125.72	0.03339		3125.72	-0.01399		3125.72	-0.01399
3125.24	-0.00093		3125.24	0.03332		3125.24	-0.01409		3125.24	-0.01409
3124.76	-0.00075		3124.76	0.03281		3124.76	-0.01393		3124.76	-0.01393
3124.27	-0.0008		3124.27	0.03349		3124.27	-0.01376		3124.27	-0.01376
3123.79	-0.00105		3123.79	0.03597		3123.79	-0.01378		3123.79	-0.01378
3123.31	-0.00116		3123.31	0.0376		3123.31	-0.01388		3123.31	-0.01388
3122.83	-0.0011		3122.83	0.0371		3122.83	-0.0139		3122.83	-0.0139
3122.35	-0.00109		3122.35	0.03687		3122.35	-0.01381		3122.35	-0.01381
3121.86	-0.00122		3121.86	0.03866		3121.86	-0.01373		3121.86	-0.01373
3121.38	-0.00129		3121.38	0.04147		3121.38	-0.01378		3121.38	-0.01378
3120.9	-0.00127		3120.9	0.04261		3120.9	-0.0138		3120.9	-0.0138
3120.42	-0.00123		3120.42	0.04262		3120.42	-0.01384		3120.42	-0.01384
3119.94	-0.00118		3119.94	0.04375		3119.94	-0.01384		3119.94	-0.01384
3119.45	-0.00104		3119.45	0.04653		3119.45	-0.01368		3119.45	-0.01368
3118.97	-0.00087		3118.97	0.04909		3118.97	-0.01363		3118.97	-0.01363
3118.49	-0.00112		3118.49	0.04947		3118.49	-0.01371		3118.49	-0.01371
3118.01	-0.00151		3118.01	0.04982		3118.01	-0.01372		3118.01	-0.01372
3117.52	-0.00154		3117.52	0.05236		3117.52	-0.01373		3117.52	-0.01373
3117.04	-0.00136		3117.04	0.05594		3117.04	-0.01371		3117.04	-0.01371
3116.56	-0.00123		3116.56	0.05727		3116.56	-0.01368		3116.56	-0.01368
3116.08	-0.00124		3116.08	0.05672		3116.08	-0.01357		3116.08	-0.01357
3115.6	-0.00128		3115.6	0.05811		3115.6	-0.01342		3115.6	-0.01342
3115.11	-0.00127		3115.11	0.06248		3115.11	-0.01353		3115.11	-0.01353
3114.63	-0.0012		3114.63	0.06736		3114.63	-0.01367		3114.63	-0.01367
3114.15	-0.0012		3114.15	0.06885		3114.15	-0.01364		3114.15	-0.01364
3113.67	-0.0015		3113.67	0.06941		3113.67	-0.01354		3113.67	-0.01354
3113.19	-0.00166		3113.19	0.07172		3113.19	-0.01342		3113.19	-0.01342
3112.7	-0.00143		3112.7	0.07414		3112.7	-0.0134		3112.7	-0.0134
3112.22	-0.00121		3112.22	0.07714		3112.22	-0.01357		3112.22	-0.01357
3111.74	-0.0012		3111.74	0.07942		3111.74	-0.0137		3111.74	-0.0137
3111.26	-0.00133		3111.26	0.0804		3111.26	-0.01357		3111.26	-0.01357
3110.77	-0.00141		3110.77	0.08164		3110.77	-0.01342		3110.77	-0.01342
3110.29	-0.00142		3110.29	0.08533		3110.29	-0.01347		3110.29	-0.01347
3109.81	-0.00142		3109.81	0.09011		3109.81	-0.01345		3109.81	-0.01345
3109.33	-0.00133		3109.33	0.09141		3109.33	-0.01336		3109.33	-0.01336
3108.85	-0.00123		3108.85	0.09059		3108.85	-0.01338		3108.85	-0.01338
3108.36	-0.00121		3108.36	0.09176		3108.36	-0.01348		3108.36	-0.01348
3107.88	-0.00126		3107.88	0.09696		3107.88	-0.01343		3107.88	-0.01343
3107.4	-0.00133		3107.4	0.10192		3107.4	-0.01346		3107.4	-0.01346
3106.92	-0.00133		3106.92	0.10205		3106.92	-0.01364		3106.92	-0.01364
3106.44	-0.00132		3106.44	0.10037		3106.44	-0.01362		3106.44	-0.01362
3105.95	-0.00127		3105.95	0.10155		3105.95	-0.01359		3105.95	-0.01359
3105.47	-0.00121		3105.47	0.10735		3105.47	-0.01347		3105.47	-0.01347
3104.99	-0.00135		3104.99	0.11118		3104.99	-0.01332		3104.99	-0.01332
3104.51	-0.00147		3104.51	0.10907		3104.51	-0.01351		3104.51	-0.01351
3104.02	-0.00145		3104.02	0.10632		3104.02	-0.01365		3104.02	-0.01365
3103.54	-0.00139		3103.54	0.10808		3103.54	-0.01361		3103.54	-0.01361
3103.06	-0.0013		3103.06	0.11331		3103.06	-0.01353		3103.06	-0.01353
3102.58	-0.00128		3102.58	0.11419		3102.58	-0.01337		3102.58	-0.01337
3102.1	-0.00139		3102.1	0.10983		3102.1	-0.0133		3102.1	-0.0133
3101.61	-0.00147		3101.61	0.10622		3101.61	-0.01338		3101.61	-0.01338
3101.13	-0.00153		3101.13	0.10713		3101.13	-0.0134		3101.13	-0.0134
3100.65	-0.00164		3100.65	0.11005		3100.65	-0.01325		3100.65	-0.01325
3100.17	-0.00162		3100.17	0.10877		3100.17	-0.01325		3100.17	-0.01325
3099.69	-0.0016		3099.69	0.10459		3099.69	-0.01332		3099.69	-0.01332
3099.2	-0.00163		3099.2	0.10119		3099.2	-0.01331		3099.2	-0.01331
3098.72	-0.00149		3098.72	0.09994		3098.72	-0.0134		3098.72	-0.0134
3098.24	-0.00146		3098.24	0.09925		3098.24	-0.01342		3098.24	-0.01342
3097.76	-0.00159		3097.76	0.0962		3097.76	-0.01334		3097.76	-0.01334
3097.27	-0.00151		3097.27	0.09237		3097.27	-0.01328		3097.27	-0.01328
3096.79	-0.00143		3096.79	0.08846		3096.79	-0.01314		3096.79	-0.01314
3096.31	-0.00147		3096.31	0.08388		3096.31	-0.01309		3096.31	-0.01309
3095.83	-0.00142		3095.83	0.08111		3095.83	-0.01311		3095.83	-0.01311
3095.35	-0.00139		3095.35	0.08014		3095.35	-0.01315		3095.35	-0.01315
3094.86	-0.00149		3094.86	0.07764		3094.86	-0.01333		3094.86	-0.01333
3094.38	-0.00156		3094.38	0.0781		3094.38	-0.01336		3094.38	-0.01336
3093.9	-0.00152		3093.9	0.08357		3093.9	-0.01317		3093.9	-0.01317
3093.42	-0.00139		3093.42	0.08552		3093.42	-0.01311		3093.42	-0.01311
3092.94	-0.0014		3092.94	0.0861		3092.94	-0.0133		3092.94	-0.0133
3092.45	-0.00151		3092.45	0.0937		3092.45	-0.01354		3092.45	-0.01354
3091.97	-0.00139		3091.97	0.10615		3091.97	-0.01351		3091.97	-0.01351
3091.49	-0.00129		3091.49	0.11588		3091.49	-0.01343		3091.49	-0.01343
3091.01	-0.00136		3091.01	0.11649		3091.01	-0.01337		3091.01	-0.01337
3090.52	-0.0014		3090.52	0.10865		3090.52	-0.01319		3090.52	-0.01319
3090.04	-0.00126		3090.04	0.09925		3090.04	-0.01322		3090.04	-0.01322
3089.56	-0.00105		3089.56	0.0939		3089.56	-0.01333		3089.56	-0.01333
3089.08	-0.00098		3089.08	0.0931		3089.08	-0.01325		3089.08	-0.01325
3088.6	-0.00108		3088.6	0.09294		3088.6	-0.01302		3088.6	-0.01302
3088.11	-0.00127		3088.11	0.09003		3088.11	-0.01289		3088.11	-0.01289
3087.63	-0.00136		3087.63	0.0869		3087.63	-0.01309		3087.63	-0.01309
3087.15	-0.00137		3087.15	0.08698		3087.15	-0.01331		3087.15	-0.01331
3086.67	-0.00139		3086.67	0.08944		3086.67	-0.01325		3086.67	-0.01325
3086.19	-0.00131		3086.19	0.09293		3086.19	-0.01297		3086.19	-0.01297
3085.7	-0.00117		3085.7	0.09512		3085.7	-0.01287		3085.7	-0.01287
3085.22	-0.00117		3085.22	0.09495		3085.22	-0.01305		3085.22	-0.01305
3084.74	-0.00125		3084.74	0.09476		3084.74	-0.01324		3084.74	-0.01324
3084.26	-0.0013		3084.26	0.09651		3084.26	-0.01336		3084.26	-0.01336
3083.77	-0.00138		3083.77	0.10109		3083.77	-0.01332		3083.77	-0.01332
3083.29	-0.00132		3083.29	0.10518		3083.29	-0.01319		3083.29	-0.01319
3082.81	-0.0012		3082.81	0.1048		3082.81	-0.01307		3082.81	-0.01307
3082.33	-0.0013		3082.33	0.10167		3082.33	-0.01293		3082.33	-0.01293
3081.85	-0.00132		3081.85	0.09948		3081.85	-0.0128		3081.85	-0.0128
3081.36	-0.00125		3081.36	0.10135		3081.36	-0.01276		3081.36	-0.01276
3080.88	-0.00127		3080.88	0.1057		3080.88	-0.01275		3080.88	-0.01275
3080.4	-0.00122		3080.4	0.10539		3080.4	-0.01272		3080.4	-0.01272
3079.92	-0.00119		3079.92	0.10022		3079.92	-0.01281		3079.92	-0.01281
3079.44	-0.00132		3079.44	0.09617		3079.44	-0.01284		3079.44	-0.01284
3078.95	-0.00149		3078.95	0.09555		3078.95	-0.01289		3078.95	-0.01289
3078.47	-0.00149		3078.47	0.09911		3078.47	-0.01306		3078.47	-0.01306
3077.99	-0.00143		3077.99	0.10208		3077.99	-0.01296		3077.99	-0.01296
3077.51	-0.00143		3077.51	0.0988		3077.51	-0.0127		3077.51	-0.0127
3077.02	-0.00136		3077.02	0.09387		3077.02	-0.01247		3077.02	-0.01247
3076.54	-0.00141		3076.54	0.0921		3076.54	-0.01243		3076.54	-0.01243
3076.06	-0.00148		3076.06	0.09432		3076.06	-0.01252		3076.06	-0.01252
3075.58	-0.00138		3075.58	0.09833		3075.58	-0.01249		3075.58	-0.01249
3075.1	-0.00132		3075.1	0.0983		3075.1	-0.01251		3075.1	-0.01251
3074.61	-0.00136		3074.61	0.09448		3074.61	-0.01257		3074.61	-0.01257
3074.13	-0.00139		3074.13	0.09144		3074.13	-0.01254		3074.13	-0.01254
3073.65	-0.00141		3073.65	0.09053		3073.65	-0.01258		3073.65	-0.01258
3073.17	-0.00137		3073.17	0.09302		3073.17	-0.01269		3073.17	-0.01269
3072.69	-0.00123		3072.69	0.09609		3072.69	-0.01263		3072.69	-0.01263
3072.2	-0.00121		3072.2	0.09413		3072.2	-0.01247		3072.2	-0.01247
3071.72	-0.00124		3071.72	0.09032		3071.72	-0.01253		3071.72	-0.01253
3071.24	-0.00122		3071.24	0.08925		3071.24	-0.01264		3071.24	-0.01264
3070.76	-0.00121		3070.76	0.08925		3070.76	-0.01272		3070.76	-0.01272
3070.27	-0.00114		3070.27	0.08978		3070.27	-0.01264		3070.27	-0.01264
3069.79	-0.00121		3069.79	0.09027		3069.79	-0.01233		3069.79	-0.01233
3069.31	-0.00137		3069.31	0.08882		3069.31	-0.01219		3069.31	-0.01219
3068.83	-0.00136		3068.83	0.08667		3068.83	-0.01219		3068.83	-0.01219
3068.35	-0.00123		3068.35	0.08503		3068.35	-0.01227		3068.35	-0.01227
3067.86	-0.00106		3067.86	0.08386		3067.86	-0.01237		3067.86	-0.01237
3067.38	-0.00101		3067.38	0.0836		3067.38	-0.01229		3067.38	-0.01229
3066.9	-0.00112		3066.9	0.08358		3066.9	-0.01227		3066.9	-0.01227
3066.42	-0.00124		3066.42	0.08239		3066.42	-0.01226		3066.42	-0.01226
3065.94	-0.00127		3065.94	0.07919		3065.94	-0.01218		3065.94	-0.01218
3065.45	-0.00127		3065.45	0.07671		3065.45	-0.01208		3065.45	-0.01208
3064.97	-0.00129		3064.97	0.07785		3064.97	-0.01202		3064.97	-0.01202
3064.49	-0.00128		3064.49	0.07854		3064.49	-0.01206		3064.49	-0.01206
3064.01	-0.00123		3064.01	0.07656		3064.01	-0.01195		3064.01	-0.01195
3063.52	-0.00122		3063.52	0.07438		3063.52	-0.01183		3063.52	-0.01183
3063.04	-0.00136		3063.04	0.07192		3063.04	-0.01184		3063.04	-0.01184
3062.56	-0.00152		3062.56	0.07092		3062.56	-0.01188		3062.56	-0.01188
3062.08	-0.00143		3062.08	0.07207		3062.08	-0.01186		3062.08	-0.01186
3061.6	-0.00116		3061.6	0.07198		3061.6	-0.01184		3061.6	-0.01184
3061.11	-0.00112		3061.11	0.07074		3061.11	-0.01179		3061.11	-0.01179
3060.63	-0.00134		3060.63	0.06948		3060.63	-0.01143		3060.63	-0.01143
3060.15	-0.00136		3060.15	0.06778		3060.15	-0.0112		3060.15	-0.0112
3059.67	-0.00108		3059.67	0.0672		3059.67	-0.01138		3059.67	-0.01138
3059.19	-0.00095		3059.19	0.06739		3059.19	-0.0114		3059.19	-0.0114
3058.7	-0.00128		3058.7	0.06633		3058.7	-0.01126		3058.7	-0.01126
3058.22	-0.00163		3058.22	0.06525		3058.22	-0.01118		3058.22	-0.01118
3057.74	-0.00166		3057.74	0.06406		3057.74	-0.01122		3057.74	-0.01122
3057.26	-0.00155		3057.26	0.06243		3057.26	-0.01116		3057.26	-0.01116
3056.77	-0.00137		3056.77	0.06239		3056.77	-0.01097		3056.77	-0.01097
3056.29	-0.00125		3056.29	0.06278		3056.29	-0.01088		3056.29	-0.01088
3055.81	-0.00115		3055.81	0.06235		3055.81	-0.01078		3055.81	-0.01078
3055.33	-0.00094		3055.33	0.06187		3055.33	-0.0106		3055.33	-0.0106
3054.85	-0.0009		3054.85	0.06085		3054.85	-0.0105		3054.85	-0.0105
3054.36	-0.00102		3054.36	0.05999		3054.36	-0.01042		3054.36	-0.01042
3053.88	-0.00115		3053.88	0.06063		3053.88	-0.01034		3053.88	-0.01034
3053.4	-0.00116		3053.4	0.06151		3053.4	-0.01028		3053.4	-0.01028
3052.92	-0.00114		3052.92	0.06122		3052.92	-0.01026		3052.92	-0.01026
3052.44	-0.0012		3052.44	0.06032		3052.44	-0.01031		3052.44	-0.01031
3051.95	-0.00117		3051.95	0.05958		3051.95	-0.01029		3051.95	-0.01029
3051.47	-0.00094		3051.47	0.05958		3051.47	-0.00999		3051.47	-0.00999
3050.99	-0.00075		3050.99	0.06063		3050.99	-0.00964		3050.99	-0.00964
3050.51	-0.00084		3050.51	0.06158		3050.51	-0.00957		3050.51	-0.00957
3050.02	-0.00097		3050.02	0.06129		3050.02	-0.00965		3050.02	-0.00965
3049.54	-0.00085		3049.54	0.0601		3049.54	-0.00969		3049.54	-0.00969
3049.06	-0.00058		3049.06	0.05919		3049.06	-0.00959		3049.06	-0.00959
3048.58	-0.00058		3048.58	0.05948		3048.58	-0.00937		3048.58	-0.00937
3048.1	-0.00081		3048.1	0.06084		3048.1	-0.00919		3048.1	-0.00919
3047.61	-0.00089		3047.61	0.062		3047.61	-0.00899		3047.61	-0.00899
3047.13	-0.00068		3047.13	0.06172		3047.13	-0.0089		3047.13	-0.0089
3046.65	-0.0004		3046.65	0.06035		3046.65	-0.0089		3046.65	-0.0089
3046.17	-0.00039		3046.17	0.05961		3046.17	-0.00882		3046.17	-0.00882
3045.69	-0.00051		3045.69	0.06062		3045.69	-0.00859		3045.69	-0.00859
3045.2	-0.00052		3045.2	0.06266		3045.2	-0.00831		3045.2	-0.00831
3044.72	-0.00045		3044.72	0.06392		3044.72	-0.00822		3044.72	-0.00822
3044.24	-0.00036		3044.24	0.0636		3044.24	-0.00814		3044.24	-0.00814
3043.76	-0.00032		3043.76	0.06294		3043.76	-0.00786		3043.76	-0.00786
3043.27	-0.00019		3043.27	0.0634		3043.27	-0.0075		3043.27	-0.0075
3042.79	-0.00015		3042.79	0.06503		3042.79	-0.00736		3042.79	-0.00736
3042.31	-9e-05		3042.31	0.06647		3042.31	-0.00737		3042.31	-0.00737
3041.83	6e-05		3041.83	0.06653		3041.83	-0.00719		3041.83	-0.00719
3041.35	7e-05		3041.35	0.06625		3041.35	-0.00682		3041.35	-0.00682
3040.86	0.00012		3040.86	0.06697		3040.86	-0.00638		3040.86	-0.00638
3040.38	0.0001		3040.38	0.06845		3040.38	-0.00616		3040.38	-0.00616
3039.9	5e-05		3039.9	0.06971		3039.9	-0.00609		3039.9	-0.00609
3039.42	0.00022		3039.42	0.06988		3039.42	-0.00588		3039.42	-0.00588
3038.94	0.0004		3038.94	0.06982		3038.94	-0.00568		3038.94	-0.00568
3038.45	0.00052		3038.45	0.07046		3038.45	-0.00536		3038.45	-0.00536
3037.97	0.00073		3037.97	0.07115		3037.97	-0.00477		3037.97	-0.00477
3037.49	0.00089		3037.49	0.07179		3037.49	-0.00425		3037.49	-0.00425
3037.01	0.00093		3037.01	0.07251		3037.01	-0.00411		3037.01	-0.00411
[truncated: 4,951 more rows]

## Sheet: SAR Jenkin - Figure 6
Figure 6
T(K)	1000/T (K-1)		CH3				CH2					k1/10^12 cm3 molecule-1 s-1
298	3.3557		0.130118	3.49723	1.8202		0.76872	3.49723	1.34805	7.24815		9.06836
299	3.34448		0.131476	3.4582	1.81867		0.773523	3.4582	1.3467	7.20484		9.02352
300	3.33333		0.132838	3.41986	1.81715		0.778324	3.41986	1.34537	7.16208		8.97923
301	3.32226		0.134206	3.38219	1.81564		0.783122	3.38219	1.34404	7.11985		8.9355
302	3.31126		0.135579	3.34519	1.81415		0.787918	3.34519	1.34273	7.07815		8.8923
303	3.30033		0.136956	3.30883	1.81266		0.792712	3.30883	1.34142	7.03696		8.84962
304	3.28947		0.138338	3.27311	1.81119		0.797502	3.27311	1.34013	6.99629		8.80747
305	3.27869		0.139725	3.23799	1.80972		0.80229	3.23799	1.33884	6.95611		8.76583
306	3.26797		0.141117	3.20349	1.80827		0.807076	3.20349	1.33756	6.91642		8.72469
307	3.25733		0.142513	3.16957	1.80682		0.811858	3.16957	1.3363	6.87722		8.68404
308	3.24675		0.143914	3.13622	1.80539		0.816637	3.13622	1.33504	6.83849		8.64388
309	3.23625		0.14532	3.10344	1.80397		0.821413	3.10344	1.33379	6.80023		8.6042
310	3.22581		0.14673	3.07121	1.80256		0.826186	3.07121	1.33255	6.76242		8.56498
311	3.21543		0.148145	3.03952	1.80116		0.830956	3.03952	1.33132	6.72507		8.52623
312	3.20513		0.149564	3.00836	1.79976		0.835723	3.00836	1.3301	6.68816		8.48793
313	3.19489		0.150987	2.97771	1.79838		0.840486	2.97771	1.32889	6.65169		8.45007
314	3.18471		0.152415	2.94756	1.79701		0.845245	2.94756	1.32769	6.61565		8.41266
315	3.1746		0.153847	2.91791	1.79565		0.850001	2.91791	1.32649	6.58003		8.37567
316	3.16456		0.155283	2.88875	1.7943		0.854754	2.88875	1.32531	6.54482		8.33912
317	3.15457		0.156724	2.86005	1.79295		0.859503	2.86005	1.32413	6.51002		8.30298
318	3.14465		0.158169	2.83182	1.79162		0.864248	2.83182	1.32296	6.47563		8.26725
319	3.1348		0.159617	2.80404	1.7903		0.868989	2.80404	1.3218	6.44163		8.23193
320	3.125		0.16107	2.77671	1.78898		0.873727	2.77671	1.32065	6.40802		8.197
321	3.11526		0.162527	2.74981	1.78767		0.87846	2.74981	1.31951	6.37479		8.16247
322	3.10559		0.163988	2.72333	1.78638		0.88319	2.72333	1.31837	6.34195		8.12832
323	3.09598		0.165453	2.69727	1.78509		0.887916	2.69727	1.31724	6.30947		8.09456
324	3.08642		0.166922	2.67162	1.78381		0.892637	2.67162	1.31612	6.27735		8.06117
325	3.07692		0.168395	2.64637	1.78254		0.897354	2.64637	1.31501	6.2456		8.02814
326	3.06748		0.169872	2.62151	1.78128		0.902067	2.62151	1.31391	6.2142		7.99548
327	3.0581		0.171352	2.59703	1.78003		0.906776	2.59703	1.31281	6.18315		7.96318
328	3.04878		0.172836	2.57293	1.77878		0.91148	2.57293	1.31172	6.15244		7.93123
329	3.03951		0.174324	2.5492	1.77755		0.91618	2.5492	1.31064	6.12207		7.89962
330	3.0303		0.175816	2.52583	1.77632		0.920875	2.52583	1.30957	6.09204		7.86836
331	3.02115		0.177311	2.50281	1.7751		0.925566	2.50281	1.3085	6.06233		7.83743
332	3.01205		0.17881	2.48014	1.77389		0.930253	2.48014	1.30744	6.03294		7.80683
333	3.003		0.180312	2.45781	1.77269		0.934934	2.45781	1.30639	6.00387		7.77656
334	2.99401		0.181818	2.43581	1.77149		0.939611	2.43581	1.30534	5.97511		7.7466
335	2.98507		0.183327	2.41413	1.7703		0.944283	2.41413	1.30431	5.94666		7.71697
336	2.97619		0.18484	2.39278	1.76913		0.948951	2.39278	1.30328	5.91852		7.68764
337	2.96736		0.186356	2.37174	1.76795		0.953614	2.37174	1.30225	5.89067		7.65863
338	2.95858		0.187876	2.35101	1.76679		0.958271	2.35101	1.30123	5.86312		7.62991
339	2.94985		0.189398	2.33058	1.76563		0.962924	2.33058	1.30022	5.83586		7.60149
340	2.94118		0.190924	2.31045	1.76449		0.967572	2.31045	1.29922	5.80889		7.57337
341	2.93255		0.192454	2.29061	1.76334		0.972215	2.29061	1.29822	5.78219		7.54554
342	2.92398		0.193986	2.27105	1.76221		0.976853	2.27105	1.29723	5.75578		7.51799
343	2.91545		0.195522	2.25177	1.76108		0.981485	2.25177	1.29625	5.72964		7.49072
344	2.90698		0.197061	2.23277	1.75997		0.986113	2.23277	1.29527	5.70376		7.46373
345	2.89855		0.198603	2.21403	1.75885		0.990735	2.21403	1.2943	5.67816		7.43701
346	2.89017		0.200148	2.19556	1.75775		0.995352	2.19556	1.29334	5.65281		7.41056
347	2.88184		0.201696	2.17735	1.75665		0.999964	2.17735	1.29238	5.62773		7.38438
348	2.87356		0.203247	2.1594	1.75556		1.00457	2.1594	1.29143	5.60289		7.35845
349	2.86533		0.2048	2.14169	1.75448		1.00917	2.14169	1.29048	5.57831		7.33279
350	2.85714		0.206357	2.12423	1.7534		1.01377	2.12423	1.28954	5.55398		7.30738
351	2.849		0.207917	2.10701	1.75233		1.01836	2.10701	1.28861	5.52989		7.28222
352	2.84091		0.209479	2.09002	1.75127		1.02294	2.09002	1.28768	5.50604		7.25731
353	2.83286		0.211045	2.07327	1.75021		1.02752	2.07327	1.28676	5.48243		7.23264
354	2.82486		0.212613	2.05674	1.74916		1.0321	2.05674	1.28584	5.45905		7.20821
355	2.8169		0.214183	2.04044	1.74812		1.03666	2.04044	1.28493	5.4359		7.18402
356	2.80899		0.215757	2.02436	1.74708		1.04123	2.02436	1.28403	5.41298		7.16006
357	2.80112		0.217333	2.0085	1.74605		1.04578	2.0085	1.28313	5.39029		7.13634
358	2.7933		0.218911	1.99284	1.74502		1.05033	1.99284	1.28223	5.36781		7.11284
359	2.78552		0.220493	1.9774	1.74401		1.05488	1.9774	1.28135	5.34556		7.08956
360	2.77778		0.222076	1.96216	1.74299		1.05942	1.96216	1.28046	5.32352		7.06651
361	2.77008		0.223663	1.94712	1.74199		1.06395	1.94712	1.27959	5.30169		7.04367
362	2.76243		0.225251	1.93227	1.74099		1.06848	1.93227	1.27872	5.28007		7.02105
363	2.75482		0.226843	1.91762	1.74		1.073	1.91762	1.27785	5.25865		6.99865
364	2.74725		0.228436	1.90317	1.73901		1.07752	1.90317	1.27699	5.23744		6.97645
365	2.73973		0.230032	1.88889	1.73803		1.08203	1.88889	1.27613	5.21644		6.95446
366	2.73224		0.231631	1.87481	1.73705		1.08654	1.87481	1.27528	5.19562		6.93268
367	2.7248		0.233231	1.8609	1.73608		1.09103	1.8609	1.27444	5.17501		6.91109
368	2.71739		0.234834	1.84717	1.73512		1.09553	1.84717	1.2736	5.15459		6.88971
369	2.71003		0.236439	1.83362	1.73416		1.10001	1.83362	1.27277	5.13436		6.86852
370	2.7027		0.238046	1.82024	1.73321		1.10449	1.82024	1.27194	5.11432		6.84752

## Sheet: Corrected SAR - Figure 6
Figure 6
T(K)	1000/T (K-1)	CH3	Corrected CH2	k1/10^12 cm3 molecule-1 s-1
298	3.3557	1.8202	1.92845	3.74865
299	3.34448	1.81867	1.93815	3.75682
300	3.33333	1.81715	1.94783	3.76498
301	3.32226	1.81564	1.95749	3.77314
302	3.31126	1.81415	1.96714	3.78129
303	3.30033	1.81266	1.97678	3.78944
304	3.28947	1.81119	1.98639	3.79758
305	3.27869	1.80972	1.99599	3.80571
306	3.26797	1.80827	2.00557	3.81384
307	3.25733	1.80682	2.01514	3.82196
308	3.24675	1.80539	2.02469	3.83008
309	3.23625	1.80397	2.03422	3.83819
310	3.22581	1.80256	2.04374	3.84629
311	3.21543	1.80116	2.05323	3.85439
312	3.20513	1.79976	2.06271	3.86248
313	3.19489	1.79838	2.07218	3.87056
314	3.18471	1.79701	2.08162	3.87863
315	3.1746	1.79565	2.09105	3.8867
316	3.16456	1.7943	2.10046	3.89476
317	3.15457	1.79295	2.10986	3.90281
318	3.14465	1.79162	2.11923	3.91085
319	3.1348	1.7903	2.12859	3.91889
320	3.125	1.78898	2.13793	3.92691
321	3.11526	1.78767	2.14726	3.93493
322	3.10559	1.78638	2.15656	3.94294
323	3.09598	1.78509	2.16585	3.95094
324	3.08642	1.78381	2.17512	3.95893
325	3.07692	1.78254	2.18438	3.96692
326	3.06748	1.78128	2.19361	3.97489
327	3.0581	1.78003	2.20283	3.98286
328	3.04878	1.77878	2.21203	3.99081
329	3.03951	1.77755	2.22121	3.99876
330	3.0303	1.77632	2.23037	4.00669
331	3.02115	1.7751	2.23952	4.01462
332	3.01205	1.77389	2.24865	4.02254
333	3.003	1.77269	2.25776	4.03045
334	2.99401	1.77149	2.26685	4.03834
335	2.98507	1.7703	2.27593	4.04623
336	2.97619	1.76913	2.28498	4.05411
337	2.96736	1.76795	2.29402	4.06197
338	2.95858	1.76679	2.30304	4.06983
339	2.94985	1.76563	2.31204	4.07768
340	2.94118	1.76449	2.32103	4.08551
341	2.93255	1.76334	2.32999	4.09334
342	2.92398	1.76221	2.33894	4.10115
343	2.91545	1.76108	2.34787	4.10895
344	2.90698	1.75997	2.35678	4.11675
345	2.89855	1.75885	2.36567	4.12453
346	2.89017	1.75775	2.37455	4.1323
347	2.88184	1.75665	2.38341	4.14006
348	2.87356	1.75556	2.39225	4.14781
349	2.86533	1.75448	2.40107	4.15554
350	2.85714	1.7534	2.40987	4.16327
351	2.849	1.75233	2.41865	4.17098
352	2.84091	1.75127	2.42742	4.17869
353	2.83286	1.75021	2.43617	4.18638
354	2.82486	1.74916	2.4449	4.19406
355	2.8169	1.74812	2.45361	4.20172
356	2.80899	1.74708	2.4623	4.20938
357	2.80112	1.74605	2.47098	4.21703
358	2.7933	1.74502	2.47964	4.22466
359	2.78552	1.74401	2.48827	4.23228
360	2.77778	1.74299	2.4969	4.23989
361	2.77008	1.74199	2.5055	4.24749
362	2.76243	1.74099	2.51408	4.25507
363	2.75482	1.74	2.52265	4.26265
364	2.74725	1.73901	2.5312	4.27021
365	2.73973	1.73803	2.53973	4.27776
366	2.73224	1.73705	2.54824	4.28529
367	2.7248	1.73608	2.55674	4.29282
368	2.71739	1.73512	2.56521	4.30033
369	2.71003	1.73416	2.57367	4.30783
370	2.7027	1.73321	2.58211	4.31532

## Sheet: Figure 7 - RR linear Plots
TMO + Cl
DME						Cyclohexane						Propene
EXP1			EXP2			EXP1			EXP2			EXP1			EXP2
ln[CH3OCH3]0/ln[CH3OCH3]t	ln[TMO]0/ln[TMO]t		ln[CH3OCH3]0/ln[CH3OCH3]t	ln[TMO]0/ln[TMO]t		ln[c-C6H12]0/ln[c-C6H12]t	ln[TMO]0/ln[TMO]t		ln[c-C6H12]0/ln[c-C6H12]t	ln[TMO]0/ln[TMO]t		ln[C3H6]0/ln[C3H6]t	ln[TMO]0/ln[TMO]t		ln[C3H6]0/ln[C3H6]t	ln[TMO]0/ln[TMO]t
0	0		0	0		0	0		0	0		0	0		0	0
0.0836	0.08635		0.02874	0.02595		0.10455	0.03889		0.05989	0.02595		0.06962	0.03889		0.07529	0.02595
0.19487	0.17423		0.05715	0.04429		0.22309	0.07936		0.12868	0.04429		0.14429	0.07936		0.12532	0.04429
0.30427	0.26438		0.08912	0.07465		0.3812	0.1191		0.22036	0.07465		0.2329	0.1191		0.17398	0.07465
0.43873	0.36062		0.13948	0.09483		0.45745	0.18371		0.30688	0.09483		0.30557	0.18371		0.23029	0.09483
0.54753	0.46066		0.17132	0.13996		0.53197	0.22108		0.40305	0.13996		0.41985	0.22108		0.27181	0.13996
0.72539	0.57376		0.21271	0.15435		0.7038	0.25335		0.44789	0.15435		0.50086	0.25335		0.33644	0.15435
0.83672	0.68663		0.25357	0.17175		0.79882	0.30633		0.50804	0.17175		0.57486	0.30633		0.43877	0.17175
1.03343	0.78046		0.29343	0.20827		0.87751	0.35726		0.60277	0.20827		0.64467	0.35726		0.4673	0.20827
1.11662	0.89076		0.32777	0.2292		1.07345	0.40483		0.65664	0.2292		0.76245	0.40483		0.57772	0.2292
1.26892	0.9574		0.36186	0.25962		1.1362	0.42608		0.74115	0.25962		0.82265	0.42608		0.59913	0.25962
1.38139	1.06175		0.40869	0.28811		1.16912	0.43732		0.81387	0.28811		0.86663	0.43732		0.67758	0.28811
			0.44515	0.30309		1.41651	0.56662		0.88142	0.30309		1.0043	0.56662		0.7102	0.30309
												1.07902	0.64658
												1.12489	0.59303
												1.19983	0.69131
												1.33838	0.70715
TMO + OH
DME						Cyclohexane						RATE CONSTANTS
EXP1			EXP2			EXP1			EXP2			Compound	M(g/mol)	Density (g/cm3)	Oxidant	k	Source
ln[CH3OCH3]0/ln[CH3OCH3]t	ln[TMO]0/ln[TMO]t		ln[CH3OCH3]0/ln[CH3OCH3]t	ln[TMO]0/ln[TMO]t		ln[c-C6H12]0/ln[c-C6H12]t	ln[TMO]0/ln[TMO]t		ln[c-C6H12]0/ln[c-C6H12]t	ln[TMO]0/ln[TMO]t
0	0		0	0		0	0		0	0		CyHexane	84.16	0.78	OH	6.97e-12	Atkinson, R. Atmos. Chem. Phys., 86 (1986), 2233 - 2307
0.03524	0.03621		0.05656	0.06224		0.0034	0.00146		0.00623	0.00293					Cl	3.3e-10	Anderson et al., 2007
0.05307	0.0438		0.15479	0.13263		0.0223	0.00625		0.00936	0.00293		Dimethylether	46.07	0.00192	OH	2.86e-12	DeMore, W.B.; Bayes, K.D. J. Phys. Chem. A, 103 (1999), 2649 - 2654
0.05847	0.0586		0.19787	0.18828		0.04136	0.01592		0.01211	0.00668					Cl	1.73e-10	Giri, B.R.; Roscoe, J.M. J. Phys. Chem. A, 114 (2010),8369 - 8375
0.07265	0.0892		0.25386	0.22829		0.05772	0.02642		0.02756	0.01097		Propene	42.08	0.00175	OH	2.63e-11	Atkinson, R. Chem. Rev., 86 (1986)
0.07926	0.1		0.27457	0.25843		0.07028	0.0276		0.02716	0.01718					Cl	2.23e-10	Ceacero-Vega, et al. Chem. Phys. Lett., 484 (2009) 10–13
0.09374	0.124		0.29868	0.28184		0.09324	0.03974		0.04732	0.0256
0.11311	0.143		0.2591	0.24558		0.10736	0.04418		0.07247	0.03797
0.12948	0.148		0.2532	0.21687		0.10492	0.0469		0.10622	0.04546
0.12728	0.144		0.29948	0.27441		0.1304	0.0606		0.14385	0.06259
0.14743	0.166					0.13988	0.0617		0.17389	0.07858
0.15563	0.161					0.16664	0.07069		0.19514	0.08929
0.05813	0.05914					0.16334	0.07505
0.18532	0.16108					0.1905	0.07875
0.20894	0.20121					0.20252	0.08688
0.22691	0.26021					0.20706	0.08779
0.23055	0.24903
0.22606	0.21696
0.23894	0.2746
0.28457	0.29077

## Sheet: POCPE
	TMO
	EU	USA
A	100	154
nB	23
M	128.21
gs	0.838663
B	4	1
gr	0.103679
R	0.293144	0.0939394
kOH	3.1e-12
kOH(ethene)	7.8e-12
a	0.56	0.37
C	0.0038	0.0041
nC	8
b	2.7
S	0.715113	0.574545
F	1
P	0
R(O3)	0
Q	0
POCPE	17.581	6.97076
